# Supplementary material
Source: Royal Society of Chemistry journal article supplement (doi:10.1039/d6su00023a)
Supplement: d6su00023a1.xlsx [file d6su00023a1.xlsx]

## Sheet: count per target
Representation	Target	Original_N	Outliers_Removed	Final_N	Loss_%
GROVER	cf_eco_agricultural_soil	4517	217	4300	4.8
GROVER	cf_eco_air_indoor	4688	235	4453	5.01
GROVER	cf_eco_air_unspecified	4529	215	4314	4.75
GROVER	cf_eco_fresh_water	4529	215	4314	4.75
GROVER	cf_eco_lower_stratosphere_and_upper_troposphere	4647	217	4430	4.67
GROVER	cf_eco_non-agricultural_soil	4531	217	4314	4.79
GROVER	cf_eco_non-urban_air_or_from_high_stacks	4524	212	4312	4.69
GROVER	cf_eco_sea_water	4529	216	4313	4.77
GROVER	cf_eco_soil_unspecified	4531	217	4314	4.79
GROVER	cf_eco_urban_air_close_to_ground	4524	212	4312	4.69
GROVER	cf_eco_water_unspecified	4528	215	4313	4.75
GROVER	cf_hh_total_agricultural_soil	3029	197	2832	6.5
GROVER	cf_hh_total_air_indoor	3029	197	2832	6.5
GROVER	cf_hh_total_air_unspecified	3029	197	2832	6.5
GROVER	cf_hh_total_fresh_water	3029	197	2832	6.5
GROVER	cf_hh_total_lower_stratosphere_and_upper_troposphere	3029	197	2832	6.5
GROVER	cf_hh_total_non-agricultural_soil	3029	197	2832	6.5
GROVER	cf_hh_total_non-urban_air_or_from_high_stacks	3029	197	2832	6.5
GROVER	cf_hh_total_sea_water	3029	197	2832	6.5
GROVER	cf_hh_total_soil_unspecified	3029	197	2832	6.5
GROVER	cf_hh_total_urban_air_close_to_ground	3029	197	2832	6.5
GROVER	cf_hh_total_water_unspecified	3029	197	2832	6.5
MORDRED	cf_eco_agricultural_soil	4517	219	4298	4.85
MORDRED	cf_eco_air_indoor	4688	225	4463	4.8
MORDRED	cf_eco_air_unspecified	4529	219	4310	4.84
MORDRED	cf_eco_fresh_water	4529	219	4310	4.84
MORDRED	cf_eco_lower_stratosphere_and_upper_troposphere	4647	222	4425	4.78
MORDRED	cf_eco_non-agricultural_soil	4531	219	4312	4.83
MORDRED	cf_eco_non-urban_air_or_from_high_stacks	4524	219	4305	4.84
MORDRED	cf_eco_sea_water	4529	219	4310	4.84
MORDRED	cf_eco_soil_unspecified	4531	219	4312	4.83
MORDRED	cf_eco_urban_air_close_to_ground	4524	219	4305	4.84
MORDRED	cf_eco_water_unspecified	4528	219	4309	4.84
MORDRED	cf_hh_total_agricultural_soil	3029	191	2838	6.31
MORDRED	cf_hh_total_air_indoor	3029	191	2838	6.31
MORDRED	cf_hh_total_air_unspecified	3029	191	2838	6.31
MORDRED	cf_hh_total_fresh_water	3029	191	2838	6.31
MORDRED	cf_hh_total_lower_stratosphere_and_upper_troposphere	3029	191	2838	6.31
MORDRED	cf_hh_total_non-agricultural_soil	3029	191	2838	6.31
MORDRED	cf_hh_total_non-urban_air_or_from_high_stacks	3029	191	2838	6.31
MORDRED	cf_hh_total_sea_water	3029	191	2838	6.31
MORDRED	cf_hh_total_soil_unspecified	3029	191	2838	6.31
MORDRED	cf_hh_total_urban_air_close_to_ground	3029	191	2838	6.31
MORDRED	cf_hh_total_water_unspecified	3029	191	2838	6.31

## Sheet: sensitivity
Target	Algo	R2_mean_With_Outliers	R2_mean_Without_Outliers	R2_sd_With_Outliers	R2_sd_Without_Outliers	RMSE_mean_With_Outliers	RMSE_mean_Without_Outliers	RMSE_sd_With_Outliers	RMSE_sd_Without_Outliers	Delta_R2_With_minus_Without	Delta_RMSE_With_minus_Without
cf_eco_water_unspecified	MPNN_GE_S	0.379733	0.46681	0.0428548	0.0650882	1.27683	1.26503	0.103322	0.166214	-0.0870764	0.0117999
cf_hh_total_non-agricultural_soil	MPNN_GE_S	0.361264	0.437997	0.0204906	0.0159008	1.51111	1.31515	0.122064	0.0280493	-0.0767331	0.195958
cf_eco_air_unspecified	MPNN_GE_S	0.452804	0.524859	0.0243311	0.0592626	1.42812	1.2931	0.222292	0.0905747	-0.0720553	0.13502
cf_hh_total_soil_unspecified	MPNN_GE_S	0.361316	0.429101	0.0718269	0.0339076	1.31813	1.17483	0.0904167	0.0435305	-0.0677852	0.143294
cf_hh_total_water_unspecified	MPNN_GE_S	0.438443	0.499341	0.0349751	0.0595335	1.15451	1.00472	0.0724454	0.043002	-0.0608976	0.149796
cf_hh_total_fresh_water	MPNN_GE_S	0.453703	0.506526	0.0877882	0.0735597	1.13555	0.994508	0.0981263	0.023601	-0.0528226	0.141039
cf_hh_total_air_indoor	MPNN_GE_S	0.380753	0.43094	0.0556954	0.0404443	0.984541	0.892401	0.0743871	0.0345664	-0.0501871	0.09214
cf_eco_fresh_water	MPNN_GE_S	0.449892	0.493961	0.117384	0.0922492	1.28409	1.08163	0.315181	0.0591121	-0.0440697	0.202463
cf_hh_total_water_unspecified	MPNN_GE_M	0.442986	0.483666	0.075781	0.0786784	1.14728	1.0182	0.074211	0.0238132	-0.0406792	0.129076
cf_hh_total_fresh_water	MPNN_GE_M	0.445462	0.485618	0.0681714	0.0743439	1.1445	1.01563	0.0700757	0.0252419	-0.0401554	0.128873
cf_hh_total_non-agricultural_soil	MPNN_GE_M	0.377669	0.41364	0.0748064	0.0404529	1.48777	1.34228	0.108045	0.0129186	-0.0359713	0.145497
cf_eco_water_unspecified	XGB	0.44838	0.483209	0.0374992	0.0259716	1.1935	1.17653	0.0608983	0.114709	-0.0348292	0.0169662
cf_eco_air_indoor	XGB	0.492733	0.52401	0.0295423	0.0330433	1.46843	1.2837	0.106691	0.11854	-0.0312776	0.184728
cf_hh_total_sea_water	XGB	0.530502	0.56138	0.118224	0.0146412	1.4092	1.33548	0.219161	0.118578	-0.0308779	0.0737166
cf_hh_total_soil_unspecified	MPNN_GE_M	0.372179	0.401173	0.0654762	0.055086	1.30684	1.20221	0.080495	0.0417193	-0.0289941	0.104635
cf_hh_total_lower_stratosphere_and_upper_troposphere	MPNN_GE_S	0.464387	0.491945	0.0781754	0.0213812	1.09404	0.979037	0.0663265	0.0797449	-0.0275576	0.115
cf_hh_total_agricultural_soil	MPNN_GE_S	0.385665	0.411525	0.0518943	0.0362893	1.29146	1.193	0.0671188	0.0621491	-0.02586	0.0984611
cf_hh_total_agricultural_soil	MPNN_GE_M	0.376252	0.399252	0.0670737	0.0523798	1.30132	1.20393	0.0897907	0.0386314	-0.0229997	0.0973858
cf_eco_agricultural_soil	MPNN_GE_S	0.443474	0.462834	0.0687837	0.063578	1.56401	1.5175	0.225079	0.034995	-0.0193608	0.0465111
cf_eco_agricultural_soil	XGB	0.451859	0.469698	0.0156278	0.066596	1.46934	1.3443	0.102339	0.0722165	-0.0178399	0.125041
cf_eco_water_unspecified	MPNN_GO_M	0.416786	0.425592	0.0410057	0.119459	1.29423	1.2143	0.0695329	0.246747	-0.00880621	0.0799365
cf_eco_fresh_water	MPNN_GO_M	0.414876	0.423649	0.0426058	0.117732	1.29629	1.21661	0.0700945	0.244861	-0.00877321	0.0796758
cf_eco_sea_water	MPNN_GO_M	0.544263	0.551843	0.0222199	0.055936	2.84202	2.58944	0.175298	0.177776	-0.00757969	0.252584
cf_hh_total_sea_water	MPNN_GE_M	0.521128	0.526498	0.0634169	0.0298242	1.49421	1.34998	0.270558	0.199467	-0.0053693	0.144237
cf_eco_lower_stratosphere_and_upper_troposphere	MPNN_GE_S	0.521043	0.52613	0.0542853	0.00824403	1.40173	1.43729	0.0803443	0.0489132	-0.00508636	-0.0355528
cf_eco_air_unspecified	XGB	0.518944	0.523468	0.0606227	0.0282759	1.32601	1.3584	0.0510821	0.0401165	-0.00452431	-0.0323892
cf_eco_urban_air_close_to_ground	XGB	0.540051	0.544021	0.020049	0.0112318	1.33196	1.33326	0.0988781	0.0195677	-0.00396938	-0.00130362
cf_eco_non-urban_air_or_from_high_stacks	MPNN_GE_S	0.463606	0.46742	0.0555526	0.0389592	1.56459	1.46681	0.137669	0.0461204	-0.00381433	0.0977719
cf_eco_sea_water	XGB	0.636953	0.639554	0.0130169	0.00590478	2.4706	2.3919	0.0590456	0.0241053	-0.00260073	0.0786966
cf_hh_total_non-agricultural_soil	MPNN_GO_M	0.396703	0.396438	0.0400797	0.0798049	1.46868	1.36267	0.13562	0.123547	0.000264605	0.106009
cf_eco_sea_water	MPNN_GE_M	0.573849	0.572584	0.0205323	0.0400237	2.74869	2.52946	0.18053	0.10725	0.00126499	0.219232
cf_hh_total_fresh_water	MPNN_GO_M	0.47014	0.467488	0.0124859	0.0607548	1.12183	1.03758	0.0805438	0.0916285	0.00265267	0.0842482
cf_eco_non-urban_air_or_from_high_stacks	XGB	0.53549	0.53255	0.00400868	0.0142096	1.38082	1.42715	0.0757272	0.0307174	0.00294066	-0.0463302
cf_eco_soil_unspecified	XGB	0.490676	0.48751	0.0728287	0.0412912	1.44895	1.33482	0.0467968	0.00788415	0.00316633	0.114135
cf_hh_total_non-urban_air_or_from_high_stacks	MPNN_GE_S	0.457398	0.454178	0.0772238	0.0653145	1.10126	1.01237	0.0647603	0.0415389	0.00321958	0.0888898
cf_eco_air_indoor	MPNN_GO_M	0.503289	0.499618	0.0423682	0.095522	1.39394	1.34599	0.0839421	0.22856	0.00367121	0.0479543
cf_eco_urban_air_close_to_ground	MPNN_GO_M	0.496596	0.491439	0.050278	0.0974317	1.40394	1.35452	0.080185	0.236886	0.00515747	0.0494199
cf_hh_total_urban_air_close_to_ground	MPNN_GE_S	0.417374	0.411654	0.0597984	0.042079	0.987243	0.906781	0.0573134	0.0715503	0.00571989	0.0804617
cf_hh_total_air_unspecified	MPNN_GE_M	0.437256	0.431367	0.0335849	0.0501873	0.989439	0.904851	0.0339313	0.0538366	0.00588854	0.0845882
cf_hh_total_water_unspecified	MPNN_GO_M	0.47216	0.46611	0.0152533	0.0634687	1.12015	1.04	0.0774627	0.0938868	0.00605027	0.0801555
cf_hh_total_sea_water	MPNN_GE_S	0.534899	0.527842	0.0842245	0.00842515	1.46769	1.34973	0.255223	0.208724	0.00705783	0.117962
cf_eco_air_unspecified	MPNN_GO_M	0.50028	0.493217	0.0501718	0.0967132	1.40389	1.35511	0.0848471	0.238468	0.00706307	0.0487868
cf_eco_urban_air_close_to_ground	MPNN_GE_S	0.466948	0.459486	0.0568828	0.0617399	1.47303	1.39362	0.132578	0.0361287	0.0074624	0.0794139
cf_hh_total_air_unspecified	MPNN_GE_S	0.440738	0.432761	0.074727	0.0519218	0.985371	0.903356	0.0724186	0.0465577	0.00797718	0.0820152
cf_eco_non-urban_air_or_from_high_stacks	MPNN_GO_M	0.497288	0.489086	0.0557032	0.102163	1.47181	1.41244	0.0840474	0.254284	0.0082021	0.0593662
cf_hh_total_urban_air_close_to_ground	MPNN_GE_M	0.426424	0.417544	0.0376575	0.0483669	0.980065	0.900969	0.0408411	0.0497781	0.00887979	0.0790962
cf_hh_total_sea_water	MPNN_GO_M	0.479616	0.470226	0.0637789	0.0735324	1.56319	1.43493	0.318432	0.307111	0.00938943	0.128256
cf_hh_total_lower_stratosphere_and_upper_troposphere	MPNN_GE_M	0.480189	0.470314	0.0418671	0.0421041	1.07941	0.997475	0.0298803	0.0482267	0.00987465	0.0819338
cf_eco_lower_stratosphere_and_upper_troposphere	MPNN_GO_M	0.505631	0.494904	0.0534301	0.100046	1.45696	1.40876	0.0918766	0.251509	0.0107269	0.0481981
cf_hh_total_agricultural_soil	XGB	0.461984	0.449827	0.00323609	0.0219831	1.18474	1.16944	0.0215819	0.05697	0.0121568	0.0152995
cf_eco_non-agricultural_soil	MPNN_GO_M	0.442498	0.430054	0.0534183	0.0714781	1.49479	1.42679	0.050375	0.242762	0.012444	0.0679979
cf_eco_non-agricultural_soil	MPNN_GE_S	0.489951	0.477258	0.0645117	0.17031	1.4801	1.36541	0.082545	0.114198	0.0126935	0.114696
cf_eco_non-agricultural_soil	XGB	0.498537	0.4858	0.0750332	0.0463865	1.43926	1.33725	0.0506569	0.0143773	0.012737	0.102011
cf_hh_total_soil_unspecified	MPNN_GO_M	0.388455	0.374433	0.0275109	0.0597385	1.29142	1.23162	0.0751966	0.114104	0.0140215	0.0598005
cf_hh_total_air_indoor	MPNN_GE_M	0.407642	0.393001	0.0214864	0.0285722	0.963324	0.922456	0.0574796	0.0472894	0.0146405	0.0408677
cf_eco_fresh_water	XGB	0.477157	0.462268	0.0717942	0.0647997	1.19822	1.26901	0.087912	0.0496715	0.0148899	-0.0707837
cf_eco_agricultural_soil	MPNN_GO_M	0.441873	0.426719	0.0473105	0.0736033	1.49721	1.4299	0.0523853	0.241584	0.0151542	0.0673025
cf_hh_total_agricultural_soil	MPNN_GO_M	0.394894	0.379622	0.0250914	0.057875	1.28304	1.22696	0.0720394	0.124771	0.0152712	0.0560775
cf_hh_total_non-urban_air_or_from_high_stacks	MPNN_GE_M	0.479325	0.463878	0.038505	0.0471637	1.08044	1.00443	0.0267779	0.0425387	0.0154466	0.0760112
cf_eco_soil_unspecified	MPNN_GE_S	0.487535	0.471824	0.071894	0.163986	1.48293	1.37524	0.104594	0.106876	0.0157119	0.107683
cf_eco_sea_water	MPNN_GE_S	0.598014	0.580803	0.0149529	0.0330575	2.68619	2.48041	0.0841031	0.145185	0.0172113	0.205781
cf_hh_total_soil_unspecified	XGB	0.457516	0.439903	0.00721035	0.0205624	1.18958	1.18016	0.0262179	0.0588772	0.0176133	0.00941673
cf_eco_soil_unspecified	MPNN_GO_M	0.444597	0.426833	0.0469007	0.0723954	1.49148	1.43039	0.0521496	0.24259	0.0177641	0.0610914
cf_eco_lower_stratosphere_and_upper_troposphere	XGB	0.530566	0.512802	0.0199939	0.0412535	1.45238	1.40472	0.121004	0.0925101	0.0177646	0.047659
cf_hh_total_air_indoor	MPNN_GO_M	0.408794	0.386582	0.0407207	0.0383598	0.962587	0.927665	0.0743069	0.0623681	0.0222123	0.0349218
cf_hh_total_air_unspecified	MPNN_GO_M	0.447567	0.423607	0.064225	0.0483176	0.979795	0.912892	0.0643547	0.0878409	0.0239601	0.0669035
cf_hh_total_urban_air_close_to_ground	MPNN_GO_M	0.43741	0.410418	0.0577277	0.0474731	0.970421	0.908348	0.0617862	0.0858373	0.026992	0.0620726
cf_eco_water_unspecified	MPNN_GE_M	0.455586	0.426446	0.0429612	0.105354	1.25444	1.21559	0.143398	0.249277	0.0291401	0.0388436
cf_hh_total_air_indoor	XGB	0.424115	0.393001	0.00340628	0.0373704	0.917646	0.937405	0.0532015	0.0308422	0.0311137	-0.0197593
cf_hh_total_water_unspecified	XGB	0.551217	0.519518	0.0357362	0.0309841	1.03209	1.02297	0.0276436	0.0577013	0.0316993	0.00911762
cf_hh_total_lower_stratosphere_and_upper_troposphere	MPNN_GO_M	0.491143	0.459206	0.0932128	0.0241886	1.06545	1.01132	0.0854343	0.103853	0.0319366	0.0541236
cf_eco_fresh_water	MPNN_GE_M	0.460404	0.427003	0.0443821	0.104471	1.24878	1.21527	0.143242	0.248687	0.0334003	0.0335101
cf_hh_total_air_unspecified	XGB	0.472363	0.4388	0.0105472	0.015102	0.924611	0.941785	0.0497332	0.0235002	0.0335635	-0.0171737
cf_hh_total_fresh_water	XGB	0.554876	0.520831	0.040886	0.0279914	1.02535	1.02045	0.0333499	0.044122	0.034045	0.00490349
cf_hh_total_non-urban_air_or_from_high_stacks	MPNN_GO_M	0.492119	0.457023	0.0862278	0.0218706	1.06487	1.01479	0.0786173	0.104519	0.0350962	0.0500777
cf_eco_air_indoor	MPNN_GE_M	0.523302	0.485912	0.0449017	0.101554	1.36749	1.36549	0.12795	0.24732	0.0373904	0.00199907
cf_eco_air_indoor	MPNN_GE_S	0.517089	0.478563	0.0496499	0.075233	1.37591	1.37568	0.128492	0.213815	0.0385255	0.000233336
cf_hh_total_urban_air_close_to_ground	XGB	0.45103	0.411153	0.006138	0.034387	0.924576	0.945122	0.0460998	0.0362999	0.0398764	-0.020546
cf_hh_total_non-agricultural_soil	XGB	0.499991	0.456757	0.0287644	0.065753	1.31457	1.30421	0.0453348	0.089817	0.0432339	0.0103611
cf_eco_urban_air_close_to_ground	MPNN_GE_M	0.522274	0.479006	0.0478283	0.0976791	1.37026	1.37241	0.131123	0.249312	0.0432678	-0.00214563
cf_eco_air_unspecified	MPNN_GE_M	0.522579	0.477471	0.0442398	0.0981406	1.37465	1.37721	0.125294	0.250522	0.0451077	-0.00255849
cf_hh_total_non-urban_air_or_from_high_stacks	XGB	0.527948	0.478706	0.0102028	0.0189862	1.00537	1.04282	0.0355023	0.0279949	0.0492414	-0.0374436
cf_hh_total_lower_stratosphere_and_upper_troposphere	XGB	0.529419	0.479315	0.0102447	0.0184693	1.00314	1.04069	0.0362518	0.0262402	0.0501039	-0.0375482
cf_eco_non-urban_air_or_from_high_stacks	MPNN_GE_M	0.527354	0.474456	0.0490939	0.100071	1.43041	1.43386	0.140246	0.262034	0.0528972	-0.00344333
cf_eco_lower_stratosphere_and_upper_troposphere	MPNN_GE_M	0.53201	0.477197	0.0482192	0.100682	1.42066	1.43405	0.142244	0.258428	0.0548134	-0.0133909
cf_eco_agricultural_soil	MPNN_GE_M	0.462978	0.400736	0.0540505	0.0638377	1.47075	1.46188	0.12168	0.235181	0.0622425	0.00886994
cf_eco_soil_unspecified	MPNN_GE_M	0.463689	0.401334	0.0507909	0.0623909	1.4676	1.46192	0.114	0.237779	0.0623551	0.00567732
cf_eco_non-agricultural_soil	MPNN_GE_M	0.462805	0.399218	0.051897	0.0623682	1.46957	1.46472	0.111007	0.237019	0.063587	0.00484756

## Sheet: in-domain out-domain error
Representation	Target	Algo	AD_status	MAE	RMSE
Mordred	cf_eco_agricultural_soil	DeepMPT_M	in-domain	0.601236	0.808777
Mordred	cf_eco_agricultural_soil	DeepMPT_M	out-of-domain	0.574472	0.687052
Mordred	cf_eco_agricultural_soil	DeepMPT_S	in-domain	0.588093	0.782193
Mordred	cf_eco_agricultural_soil	DeepMPT_S	out-of-domain	0.67379	0.709751
Mordred	cf_eco_agricultural_soil	GP	out-of-domain	1.42069	2.0634
Mordred	cf_eco_agricultural_soil	GP	in-domain	0.952266	1.28219
Mordred	cf_eco_agricultural_soil	MPNN_GE_M	out-of-domain	1.3095	1.94681
Mordred	cf_eco_agricultural_soil	MPNN_GE_M	in-domain	0.942403	1.31403
Mordred	cf_eco_agricultural_soil	MPNN_GE_S	out-of-domain	1.39406	1.98812
Mordred	cf_eco_agricultural_soil	MPNN_GE_S	in-domain	1.04132	1.49312
Mordred	cf_eco_agricultural_soil	MPNN_GO_M	out-of-domain	1.36903	1.81259
Mordred	cf_eco_agricultural_soil	MPNN_GO_M	in-domain	0.929451	1.30818
Mordred	cf_eco_agricultural_soil	MPNN_GO_S	out-of-domain	1.63718	2.53202
Mordred	cf_eco_agricultural_soil	MPNN_GO_S	in-domain	1.01873	1.50903
Mordred	cf_eco_agricultural_soil	RF	out-of-domain	1.46994	2.08325
Mordred	cf_eco_agricultural_soil	RF	in-domain	0.962904	1.30101
Mordred	cf_eco_agricultural_soil	XGB	out-of-domain	1.43606	2.02835
Mordred	cf_eco_agricultural_soil	XGB	in-domain	0.937648	1.27388
Mordred	cf_eco_air_indoor	DeepMPT_M	in-domain	0.51963	0.717708
Mordred	cf_eco_air_indoor	DeepMPT_M	out-of-domain	0.242717	0.2961
Mordred	cf_eco_air_indoor	DeepMPT_S	in-domain	0.502046	0.670521
Mordred	cf_eco_air_indoor	DeepMPT_S	out-of-domain	0.206546	0.261969
Mordred	cf_eco_air_indoor	GP	out-of-domain	1.34005	1.9152
Mordred	cf_eco_air_indoor	GP	in-domain	0.907369	1.34544
Mordred	cf_eco_air_indoor	MPNN_GE_M	out-of-domain	1.42763	1.85023
Mordred	cf_eco_air_indoor	MPNN_GE_M	in-domain	0.892373	1.22
Mordred	cf_eco_air_indoor	MPNN_GE_S	out-of-domain	1.37743	1.73664
Mordred	cf_eco_air_indoor	MPNN_GE_S	in-domain	0.878645	1.212
Mordred	cf_eco_air_indoor	MPNN_GO_M	out-of-domain	1.46419	1.82402
Mordred	cf_eco_air_indoor	MPNN_GO_M	in-domain	0.891215	1.22605
Mordred	cf_eco_air_indoor	MPNN_GO_S	out-of-domain	1.46698	1.8376
Mordred	cf_eco_air_indoor	MPNN_GO_S	in-domain	0.904681	1.25087
Mordred	cf_eco_air_indoor	RF	out-of-domain	1.29792	1.86092
Mordred	cf_eco_air_indoor	RF	in-domain	0.902641	1.34173
Mordred	cf_eco_air_indoor	XGB	out-of-domain	1.20779	1.72505
Mordred	cf_eco_air_indoor	XGB	in-domain	0.871569	1.35842
Mordred	cf_eco_air_unspecified	DeepMPT_M	in-domain	0.525965	0.72653
Mordred	cf_eco_air_unspecified	DeepMPT_M	out-of-domain	0.260754	0.301402
Mordred	cf_eco_air_unspecified	DeepMPT_S	in-domain	0.501154	0.670785
Mordred	cf_eco_air_unspecified	DeepMPT_S	out-of-domain	0.539374	0.707272
Mordred	cf_eco_air_unspecified	GP	out-of-domain	1.35151	1.7006
Mordred	cf_eco_air_unspecified	GP	in-domain	0.906416	1.3851
Mordred	cf_eco_air_unspecified	MPNN_GE_M	out-of-domain	1.44634	1.89521
Mordred	cf_eco_air_unspecified	MPNN_GE_M	in-domain	0.892974	1.22745
Mordred	cf_eco_air_unspecified	MPNN_GE_S	out-of-domain	1.51183	2.00793
Mordred	cf_eco_air_unspecified	MPNN_GE_S	in-domain	0.911562	1.25778
Mordred	cf_eco_air_unspecified	MPNN_GO_M	out-of-domain	1.51174	1.8837
Mordred	cf_eco_air_unspecified	MPNN_GO_M	in-domain	0.893484	1.23062
Mordred	cf_eco_air_unspecified	MPNN_GO_S	out-of-domain	1.71056	2.34187
Mordred	cf_eco_air_unspecified	MPNN_GO_S	in-domain	0.952894	1.34268
Mordred	cf_eco_air_unspecified	RF	out-of-domain	1.35499	1.79704
Mordred	cf_eco_air_unspecified	RF	in-domain	0.910087	1.35226
Mordred	cf_eco_air_unspecified	XGB	out-of-domain	1.22251	1.66378
Mordred	cf_eco_air_unspecified	XGB	in-domain	0.854502	1.33679
Mordred	cf_eco_fresh_water	DeepMPT_M	in-domain	0.548559	0.772785
Mordred	cf_eco_fresh_water	DeepMPT_M	out-of-domain	0.389085	0.463419
Mordred	cf_eco_fresh_water	DeepMPT_S	in-domain	0.547063	0.733933
Mordred	cf_eco_fresh_water	DeepMPT_S	out-of-domain	0.937319	1.22272
Mordred	cf_eco_fresh_water	GP	out-of-domain	1.31001	1.61647
Mordred	cf_eco_fresh_water	GP	in-domain	1.12023	1.70514
Mordred	cf_eco_fresh_water	MPNN_GE_M	out-of-domain	1.32057	1.73608
Mordred	cf_eco_fresh_water	MPNN_GE_M	in-domain	0.770882	1.05009
Mordred	cf_eco_fresh_water	MPNN_GE_S	out-of-domain	1.06605	1.51284
Mordred	cf_eco_fresh_water	MPNN_GE_S	in-domain	0.819651	1.11735
Mordred	cf_eco_fresh_water	MPNN_GO_M	out-of-domain	1.32432	1.71461
Mordred	cf_eco_fresh_water	MPNN_GO_M	in-domain	0.771741	1.06622
Mordred	cf_eco_fresh_water	MPNN_GO_S	out-of-domain	1.15967	1.67562
Mordred	cf_eco_fresh_water	MPNN_GO_S	in-domain	0.784802	1.07375
Mordred	cf_eco_fresh_water	RF	out-of-domain	0.981813	1.30994
Mordred	cf_eco_fresh_water	RF	in-domain	0.816485	1.30009
Mordred	cf_eco_fresh_water	XGB	out-of-domain	0.903598	1.23663
Mordred	cf_eco_fresh_water	XGB	in-domain	0.776452	1.32211
Mordred	cf_eco_lower_stratosphere_and_upper_troposphere	DeepMPT_M	in-domain	0.530648	0.735209
Mordred	cf_eco_lower_stratosphere_and_upper_troposphere	DeepMPT_M	out-of-domain	0.29864	0.317975
Mordred	cf_eco_lower_stratosphere_and_upper_troposphere	DeepMPT_S	in-domain	0.57562	0.797874
Mordred	cf_eco_lower_stratosphere_and_upper_troposphere	DeepMPT_S	out-of-domain	0.730157	0.882402
Mordred	cf_eco_lower_stratosphere_and_upper_troposphere	GP	out-of-domain	1.49019	2.23899
Mordred	cf_eco_lower_stratosphere_and_upper_troposphere	GP	in-domain	0.94681	1.42647
Mordred	cf_eco_lower_stratosphere_and_upper_troposphere	MPNN_GE_M	out-of-domain	1.54243	2.03238
Mordred	cf_eco_lower_stratosphere_and_upper_troposphere	MPNN_GE_M	in-domain	0.910517	1.28459
Mordred	cf_eco_lower_stratosphere_and_upper_troposphere	MPNN_GE_S	out-of-domain	1.41344	1.89768
Mordred	cf_eco_lower_stratosphere_and_upper_troposphere	MPNN_GE_S	in-domain	0.856094	1.32439
Mordred	cf_eco_lower_stratosphere_and_upper_troposphere	MPNN_GO_M	out-of-domain	1.61724	2.05339
Mordred	cf_eco_lower_stratosphere_and_upper_troposphere	MPNN_GO_M	in-domain	0.912992	1.28874
Mordred	cf_eco_lower_stratosphere_and_upper_troposphere	MPNN_GO_S	out-of-domain	1.48517	1.99721
Mordred	cf_eco_lower_stratosphere_and_upper_troposphere	MPNN_GO_S	in-domain	0.873082	1.40844
Mordred	cf_eco_lower_stratosphere_and_upper_troposphere	RF	out-of-domain	1.50406	2.1241
Mordred	cf_eco_lower_stratosphere_and_upper_troposphere	RF	in-domain	0.948473	1.3912
Mordred	cf_eco_lower_stratosphere_and_upper_troposphere	XGB	out-of-domain	1.35897	1.92913
Mordred	cf_eco_lower_stratosphere_and_upper_troposphere	XGB	in-domain	0.919527	1.42573
Mordred	cf_eco_non-agricultural_soil	DeepMPT_M	in-domain	0.596413	0.800963
Mordred	cf_eco_non-agricultural_soil	DeepMPT_M	out-of-domain	0.475333	0.546023
Mordred	cf_eco_non-agricultural_soil	DeepMPT_S	in-domain	0.569299	0.757662
Mordred	cf_eco_non-agricultural_soil	DeepMPT_S	out-of-domain	0.297878	0.410422
Mordred	cf_eco_non-agricultural_soil	GP	out-of-domain	1.28984	1.71849
Mordred	cf_eco_non-agricultural_soil	GP	in-domain	0.937865	1.30489
Mordred	cf_eco_non-agricultural_soil	MPNN_GE_M	out-of-domain	1.3153	1.94972
Mordred	cf_eco_non-agricultural_soil	MPNN_GE_M	in-domain	0.949878	1.32089
Mordred	cf_eco_non-agricultural_soil	MPNN_GE_S	out-of-domain	1.28892	1.78388
Mordred	cf_eco_non-agricultural_soil	MPNN_GE_S	in-domain	1.02074	1.48903
Mordred	cf_eco_non-agricultural_soil	MPNN_GO_M	out-of-domain	1.39018	1.82849
Mordred	cf_eco_non-agricultural_soil	MPNN_GO_M	in-domain	0.937134	1.31438
Mordred	cf_eco_non-agricultural_soil	MPNN_GO_S	out-of-domain	1.38771	2.0853
Mordred	cf_eco_non-agricultural_soil	MPNN_GO_S	in-domain	0.992445	1.44109
Mordred	cf_eco_non-agricultural_soil	RF	out-of-domain	1.26257	1.68066
Mordred	cf_eco_non-agricultural_soil	RF	in-domain	0.971791	1.31881
Mordred	cf_eco_non-agricultural_soil	XGB	out-of-domain	1.16855	1.60929
Mordred	cf_eco_non-agricultural_soil	XGB	in-domain	0.925715	1.28403
Mordred	cf_eco_non-urban_air_or_from_high_stacks	DeepMPT_M	in-domain	0.53049	0.733433
Mordred	cf_eco_non-urban_air_or_from_high_stacks	DeepMPT_M	out-of-domain	0.314533	0.338049
Mordred	cf_eco_non-urban_air_or_from_high_stacks	DeepMPT_S	in-domain	0.505944	0.698207
Mordred	cf_eco_non-urban_air_or_from_high_stacks	DeepMPT_S	out-of-domain	0.9298	0.9298
Mordred	cf_eco_non-urban_air_or_from_high_stacks	GP	out-of-domain	1.60356	2.21524
Mordred	cf_eco_non-urban_air_or_from_high_stacks	GP	in-domain	0.955832	1.35061
Mordred	cf_eco_non-urban_air_or_from_high_stacks	MPNN_GE_M	out-of-domain	1.56606	2.06177
Mordred	cf_eco_non-urban_air_or_from_high_stacks	MPNN_GE_M	in-domain	0.912423	1.28414
Mordred	cf_eco_non-urban_air_or_from_high_stacks	MPNN_GE_S	out-of-domain	1.61699	2.38083
Mordred	cf_eco_non-urban_air_or_from_high_stacks	MPNN_GE_S	in-domain	0.937958	1.31825
Mordred	cf_eco_non-urban_air_or_from_high_stacks	MPNN_GO_M	out-of-domain	1.62468	2.07153
Mordred	cf_eco_non-urban_air_or_from_high_stacks	MPNN_GO_M	in-domain	0.913991	1.29069
Mordred	cf_eco_non-urban_air_or_from_high_stacks	MPNN_GO_S	out-of-domain	1.52011	2.00971
Mordred	cf_eco_non-urban_air_or_from_high_stacks	MPNN_GO_S	in-domain	0.949807	1.34678
Mordred	cf_eco_non-urban_air_or_from_high_stacks	RF	out-of-domain	1.55861	2.17337
Mordred	cf_eco_non-urban_air_or_from_high_stacks	RF	in-domain	0.946669	1.32658
Mordred	cf_eco_non-urban_air_or_from_high_stacks	XGB	out-of-domain	1.45744	2.0317
Mordred	cf_eco_non-urban_air_or_from_high_stacks	XGB	in-domain	0.931778	1.33051
Mordred	cf_eco_sea_water	DeepMPT_M	in-domain	0.4964	0.687894
Mordred	cf_eco_sea_water	DeepMPT_M	out-of-domain	0.574312	0.82554
Mordred	cf_eco_sea_water	DeepMPT_S	in-domain	0.492822	0.656487
Mordred	cf_eco_sea_water	DeepMPT_S	out-of-domain	0.732386	0.935847
Mordred	cf_eco_sea_water	GP	out-of-domain	2.22899	2.76605
Mordred	cf_eco_sea_water	GP	in-domain	1.69863	2.4518
Mordred	cf_eco_sea_water	MPNN_GE_M	out-of-domain	2.75945	3.76095
Mordred	cf_eco_sea_water	MPNN_GE_M	in-domain	1.54265	2.24122
Mordred	cf_eco_sea_water	MPNN_GE_S	out-of-domain	2.56078	3.31417
Mordred	cf_eco_sea_water	MPNN_GE_S	in-domain	1.72117	2.54902
Mordred	cf_eco_sea_water	MPNN_GO_M	out-of-domain	3.10316	4.10848
Mordred	cf_eco_sea_water	MPNN_GO_M	in-domain	1.60286	2.38641
Mordred	cf_eco_sea_water	MPNN_GO_S	out-of-domain	2.52072	3.59167
Mordred	cf_eco_sea_water	MPNN_GO_S	in-domain	1.65747	2.54461
Mordred	cf_eco_sea_water	RF	out-of-domain	2.36443	2.94112
Mordred	cf_eco_sea_water	RF	in-domain	1.77961	2.4991
Mordred	cf_eco_sea_water	XGB	out-of-domain	2.09449	2.6676
Mordred	cf_eco_sea_water	XGB	in-domain	1.63302	2.34615
Mordred	cf_eco_soil_unspecified	DeepMPT_M	in-domain	0.592625	0.796743
Mordred	cf_eco_soil_unspecified	DeepMPT_M	out-of-domain	0.567295	0.661372
Mordred	cf_eco_soil_unspecified	DeepMPT_S	in-domain	0.568699	0.760739
Mordred	cf_eco_soil_unspecified	DeepMPT_S	out-of-domain	0.264729	0.28086
Mordred	cf_eco_soil_unspecified	GP	out-of-domain	1.28795	1.71628
Mordred	cf_eco_soil_unspecified	GP	in-domain	0.938162	1.3025
Mordred	cf_eco_soil_unspecified	MPNN_GE_M	out-of-domain	1.31452	1.93504
Mordred	cf_eco_soil_unspecified	MPNN_GE_M	in-domain	0.944873	1.31687
Mordred	cf_eco_soil_unspecified	MPNN_GE_S	out-of-domain	1.57851	2.50868
Mordred	cf_eco_soil_unspecified	MPNN_GE_S	in-domain	1.01836	1.48289
Mordred	cf_eco_soil_unspecified	MPNN_GO_M	out-of-domain	1.37322	1.80849
Mordred	cf_eco_soil_unspecified	MPNN_GO_M	in-domain	0.930794	1.30833
Mordred	cf_eco_soil_unspecified	MPNN_GO_S	out-of-domain	1.37854	2.01464
Mordred	cf_eco_soil_unspecified	MPNN_GO_S	in-domain	0.98284	1.4396
Mordred	cf_eco_soil_unspecified	RF	out-of-domain	1.25764	1.69005
Mordred	cf_eco_soil_unspecified	RF	in-domain	0.967435	1.31385
Mordred	cf_eco_soil_unspecified	XGB	out-of-domain	1.18436	1.61827
Mordred	cf_eco_soil_unspecified	XGB	in-domain	0.929829	1.28599
Mordred	cf_eco_urban_air_close_to_ground	DeepMPT_M	in-domain	0.52474	0.725226
Mordred	cf_eco_urban_air_close_to_ground	DeepMPT_M	out-of-domain	0.228161	0.274991
Mordred	cf_eco_urban_air_close_to_ground	DeepMPT_S	in-domain	0.494338	0.686436
Mordred	cf_eco_urban_air_close_to_ground	DeepMPT_S	out-of-domain	0.466034	0.466034
Mordred	cf_eco_urban_air_close_to_ground	GP	out-of-domain	1.47254	1.98274
Mordred	cf_eco_urban_air_close_to_ground	GP	in-domain	0.916462	1.27724
Mordred	cf_eco_urban_air_close_to_ground	MPNN_GE_M	out-of-domain	1.44481	1.8798
Mordred	cf_eco_urban_air_close_to_ground	MPNN_GE_M	in-domain	0.889289	1.21776
Mordred	cf_eco_urban_air_close_to_ground	MPNN_GE_S	out-of-domain	1.64992	2.46646
Mordred	cf_eco_urban_air_close_to_ground	MPNN_GE_S	in-domain	0.911387	1.25294
Mordred	cf_eco_urban_air_close_to_ground	MPNN_GO_M	out-of-domain	1.51248	1.88838
Mordred	cf_eco_urban_air_close_to_ground	MPNN_GO_M	in-domain	0.89416	1.22683
Mordred	cf_eco_urban_air_close_to_ground	MPNN_GO_S	out-of-domain	1.33768	1.77779
Mordred	cf_eco_urban_air_close_to_ground	MPNN_GO_S	in-domain	0.934906	1.32534
Mordred	cf_eco_urban_air_close_to_ground	RF	out-of-domain	1.43762	1.94693
Mordred	cf_eco_urban_air_close_to_ground	RF	in-domain	0.912857	1.26573
Mordred	cf_eco_urban_air_close_to_ground	XGB	out-of-domain	1.30788	1.8049
Mordred	cf_eco_urban_air_close_to_ground	XGB	in-domain	0.889455	1.26517
Mordred	cf_eco_water_unspecified	DeepMPT_M	in-domain	0.556578	0.780184
Mordred	cf_eco_water_unspecified	DeepMPT_M	out-of-domain	0.389772	0.462636
Mordred	cf_eco_water_unspecified	DeepMPT_S	in-domain	0.580794	0.828912
Mordred	cf_eco_water_unspecified	DeepMPT_S	out-of-domain	0.542648	0.714864
Mordred	cf_eco_water_unspecified	GP	out-of-domain	1.01772	1.31115
Mordred	cf_eco_water_unspecified	GP	in-domain	0.829759	1.26839
Mordred	cf_eco_water_unspecified	MPNN_GE_M	out-of-domain	1.29966	1.71259
Mordred	cf_eco_water_unspecified	MPNN_GE_M	in-domain	0.770631	1.0465
Mordred	cf_eco_water_unspecified	MPNN_GE_S	out-of-domain	1.27259	1.72971
Mordred	cf_eco_water_unspecified	MPNN_GE_S	in-domain	0.823336	1.41013
Mordred	cf_eco_water_unspecified	MPNN_GO_M	out-of-domain	1.32357	1.72007
Mordred	cf_eco_water_unspecified	MPNN_GO_M	in-domain	0.772074	1.06568
Mordred	cf_eco_water_unspecified	MPNN_GO_S	out-of-domain	1.3093	2.02826
Mordred	cf_eco_water_unspecified	MPNN_GO_S	in-domain	0.819357	1.4672
Mordred	cf_eco_water_unspecified	RF	out-of-domain	1.02328	1.34195
Mordred	cf_eco_water_unspecified	RF	in-domain	0.845204	1.29479
Mordred	cf_eco_water_unspecified	XGB	out-of-domain	0.938458	1.25437
Mordred	cf_eco_water_unspecified	XGB	in-domain	0.795547	1.31549
Mordred	cf_hh_total_agricultural_soil	DeepMPT_M	in-domain	0.644747	0.851357
Mordred	cf_hh_total_agricultural_soil	DeepMPT_M	out-of-domain	0.925261	0.925489
Mordred	cf_hh_total_agricultural_soil	DeepMPT_S	in-domain	0.645371	0.885201
Mordred	cf_hh_total_agricultural_soil	DeepMPT_S	out-of-domain	0.96898	0.983051
Mordred	cf_hh_total_agricultural_soil	GP	out-of-domain	1.17595	1.50372
Mordred	cf_hh_total_agricultural_soil	GP	in-domain	0.862631	1.16234
Mordred	cf_hh_total_agricultural_soil	MPNN_GE_M	out-of-domain	1.08319	1.42591
Mordred	cf_hh_total_agricultural_soil	MPNN_GE_M	in-domain	0.802788	1.09742
Mordred	cf_hh_total_agricultural_soil	MPNN_GE_S	out-of-domain	1.03411	1.32866
Mordred	cf_hh_total_agricultural_soil	MPNN_GE_S	in-domain	0.84934	1.12919
Mordred	cf_hh_total_agricultural_soil	MPNN_GO_M	out-of-domain	1.14021	1.4576
Mordred	cf_hh_total_agricultural_soil	MPNN_GO_M	in-domain	0.829128	1.09447
Mordred	cf_hh_total_agricultural_soil	MPNN_GO_S	out-of-domain	1.06088	1.36101
Mordred	cf_hh_total_agricultural_soil	MPNN_GO_S	in-domain	0.823494	1.08406
Mordred	cf_hh_total_agricultural_soil	RF	out-of-domain	1.0946	1.42746
Mordred	cf_hh_total_agricultural_soil	RF	in-domain	0.868158	1.16703
Mordred	cf_hh_total_agricultural_soil	XGB	out-of-domain	1.02915	1.31199
Mordred	cf_hh_total_agricultural_soil	XGB	in-domain	0.833023	1.11925
Mordred	cf_hh_total_air_indoor	DeepMPT_M	in-domain	0.654531	0.877728
Mordred	cf_hh_total_air_indoor	DeepMPT_M	out-of-domain	0.718041	0.788503
Mordred	cf_hh_total_air_indoor	DeepMPT_S	in-domain	0.600685	0.793287
Mordred	cf_hh_total_air_indoor	DeepMPT_S	out-of-domain	0.286499	0.295637
Mordred	cf_hh_total_air_indoor	GP	out-of-domain	0.94454	1.19726
Mordred	cf_hh_total_air_indoor	GP	in-domain	0.671502	0.898517
Mordred	cf_hh_total_air_indoor	MPNN_GE_M	out-of-domain	0.752365	0.956596
Mordred	cf_hh_total_air_indoor	MPNN_GE_M	in-domain	0.639518	0.835413
Mordred	cf_hh_total_air_indoor	MPNN_GE_S	out-of-domain	0.756803	0.990171
Mordred	cf_hh_total_air_indoor	MPNN_GE_S	in-domain	0.635591	0.829906
Mordred	cf_hh_total_air_indoor	MPNN_GO_M	out-of-domain	0.668947	0.935621
Mordred	cf_hh_total_air_indoor	MPNN_GO_M	in-domain	0.643999	0.84517
Mordred	cf_hh_total_air_indoor	MPNN_GO_S	out-of-domain	0.675569	0.962305
Mordred	cf_hh_total_air_indoor	MPNN_GO_S	in-domain	0.664542	0.872848
Mordred	cf_hh_total_air_indoor	RF	out-of-domain	0.893938	1.15217
Mordred	cf_hh_total_air_indoor	RF	in-domain	0.685137	0.905387
Mordred	cf_hh_total_air_indoor	XGB	out-of-domain	0.908785	1.14713
Mordred	cf_hh_total_air_indoor	XGB	in-domain	0.65184	0.86655
Mordred	cf_hh_total_air_unspecified	DeepMPT_M	in-domain	0.669558	0.918429
Mordred	cf_hh_total_air_unspecified	DeepMPT_M	out-of-domain	0.974669	1.02651
Mordred	cf_hh_total_air_unspecified	DeepMPT_S	in-domain	0.620002	0.819183
Mordred	cf_hh_total_air_unspecified	DeepMPT_S	out-of-domain	0.610624	0.652409
Mordred	cf_hh_total_air_unspecified	GP	out-of-domain	0.984331	1.24352
Mordred	cf_hh_total_air_unspecified	GP	in-domain	0.674456	0.913058
Mordred	cf_hh_total_air_unspecified	MPNN_GE_M	out-of-domain	0.820955	0.998824
Mordred	cf_hh_total_air_unspecified	MPNN_GE_M	in-domain	0.632275	0.806339
Mordred	cf_hh_total_air_unspecified	MPNN_GE_S	out-of-domain	0.739687	0.95597
Mordred	cf_hh_total_air_unspecified	MPNN_GE_S	in-domain	0.647998	0.824089
Mordred	cf_hh_total_air_unspecified	MPNN_GO_M	out-of-domain	0.723751	0.95382
Mordred	cf_hh_total_air_unspecified	MPNN_GO_M	in-domain	0.638375	0.820815
Mordred	cf_hh_total_air_unspecified	MPNN_GO_S	out-of-domain	0.761662	1.04403
Mordred	cf_hh_total_air_unspecified	MPNN_GO_S	in-domain	0.667764	0.853512
Mordred	cf_hh_total_air_unspecified	RF	out-of-domain	0.946901	1.20094
Mordred	cf_hh_total_air_unspecified	RF	in-domain	0.697792	0.929636
Mordred	cf_hh_total_air_unspecified	XGB	out-of-domain	0.926916	1.15443
Mordred	cf_hh_total_air_unspecified	XGB	in-domain	0.660125	0.885736
Mordred	cf_hh_total_fresh_water	DeepMPT_M	in-domain	0.634863	0.844295
Mordred	cf_hh_total_fresh_water	DeepMPT_M	out-of-domain	0.786607	0.802009
Mordred	cf_hh_total_fresh_water	DeepMPT_S	in-domain	0.546521	0.788229
Mordred	cf_hh_total_fresh_water	DeepMPT_S	out-of-domain	0.870421	0.878137
Mordred	cf_hh_total_fresh_water	GP	out-of-domain	1.1051	1.41094
Mordred	cf_hh_total_fresh_water	GP	in-domain	0.73074	1.00886
Mordred	cf_hh_total_fresh_water	MPNN_GE_M	out-of-domain	0.950954	1.23347
Mordred	cf_hh_total_fresh_water	MPNN_GE_M	in-domain	0.700309	0.931585
Mordred	cf_hh_total_fresh_water	MPNN_GE_S	out-of-domain	0.937204	1.14314
Mordred	cf_hh_total_fresh_water	MPNN_GE_S	in-domain	0.691785	0.918909
Mordred	cf_hh_total_fresh_water	MPNN_GO_M	out-of-domain	0.924627	1.18051
Mordred	cf_hh_total_fresh_water	MPNN_GO_M	in-domain	0.742105	0.978579
Mordred	cf_hh_total_fresh_water	MPNN_GO_S	out-of-domain	0.924673	1.20193
Mordred	cf_hh_total_fresh_water	MPNN_GO_S	in-domain	0.718929	0.93238
Mordred	cf_hh_total_fresh_water	RF	out-of-domain	1.07463	1.37299
Mordred	cf_hh_total_fresh_water	RF	in-domain	0.752038	1.01491
Mordred	cf_hh_total_fresh_water	XGB	out-of-domain	1.0479	1.31978
Mordred	cf_hh_total_fresh_water	XGB	in-domain	0.686043	0.937059
Mordred	cf_hh_total_lower_stratosphere_and_upper_troposphere	DeepMPT_M	in-domain	0.622755	0.847118
Mordred	cf_hh_total_lower_stratosphere_and_upper_troposphere	DeepMPT_M	out-of-domain	1.04154	1.04157
Mordred	cf_hh_total_lower_stratosphere_and_upper_troposphere	DeepMPT_S	in-domain	0.585094	0.79594
Mordred	cf_hh_total_lower_stratosphere_and_upper_troposphere	DeepMPT_S	out-of-domain	0.963685	0.997979
Mordred	cf_hh_total_lower_stratosphere_and_upper_troposphere	GP	out-of-domain	1.09686	1.39981
Mordred	cf_hh_total_lower_stratosphere_and_upper_troposphere	GP	in-domain	0.718676	0.984245
Mordred	cf_hh_total_lower_stratosphere_and_upper_troposphere	MPNN_GE_M	out-of-domain	0.964102	1.21322
Mordred	cf_hh_total_lower_stratosphere_and_upper_troposphere	MPNN_GE_M	in-domain	0.707157	0.904031
Mordred	cf_hh_total_lower_stratosphere_and_upper_troposphere	MPNN_GE_S	out-of-domain	1.08158	1.32577
Mordred	cf_hh_total_lower_stratosphere_and_upper_troposphere	MPNN_GE_S	in-domain	0.71092	0.910591
Mordred	cf_hh_total_lower_stratosphere_and_upper_troposphere	MPNN_GO_M	out-of-domain	0.897838	1.16492
Mordred	cf_hh_total_lower_stratosphere_and_upper_troposphere	MPNN_GO_M	in-domain	0.710928	0.909404
Mordred	cf_hh_total_lower_stratosphere_and_upper_troposphere	MPNN_GO_S	out-of-domain	0.928967	1.17926
Mordred	cf_hh_total_lower_stratosphere_and_upper_troposphere	MPNN_GO_S	in-domain	0.712602	0.901821
Mordred	cf_hh_total_lower_stratosphere_and_upper_troposphere	RF	out-of-domain	1.08023	1.36516
Mordred	cf_hh_total_lower_stratosphere_and_upper_troposphere	RF	in-domain	0.774974	1.02706
Mordred	cf_hh_total_lower_stratosphere_and_upper_troposphere	XGB	out-of-domain	1.04775	1.32078
Mordred	cf_hh_total_lower_stratosphere_and_upper_troposphere	XGB	in-domain	0.719835	0.968831
Mordred	cf_hh_total_non-agricultural_soil	DeepMPT_M	in-domain	0.651263	0.855502
Mordred	cf_hh_total_non-agricultural_soil	DeepMPT_M	out-of-domain	0.566829	0.569301
Mordred	cf_hh_total_non-agricultural_soil	DeepMPT_S	in-domain	0.609979	0.832829
Mordred	cf_hh_total_non-agricultural_soil	DeepMPT_S	out-of-domain	1.00639	1.01097
Mordred	cf_hh_total_non-agricultural_soil	GP	out-of-domain	1.34798	1.66133
Mordred	cf_hh_total_non-agricultural_soil	GP	in-domain	0.951211	1.28343
Mordred	cf_hh_total_non-agricultural_soil	MPNN_GE_M	out-of-domain	1.18085	1.57584
Mordred	cf_hh_total_non-agricultural_soil	MPNN_GE_M	in-domain	0.915966	1.24361
Mordred	cf_hh_total_non-agricultural_soil	MPNN_GE_S	out-of-domain	1.17922	1.58986
Mordred	cf_hh_total_non-agricultural_soil	MPNN_GE_S	in-domain	0.883126	1.18978
Mordred	cf_hh_total_non-agricultural_soil	MPNN_GO_M	out-of-domain	1.25538	1.57096
Mordred	cf_hh_total_non-agricultural_soil	MPNN_GO_M	in-domain	0.940613	1.29648
Mordred	cf_hh_total_non-agricultural_soil	MPNN_GO_S	out-of-domain	1.14048	1.52604
Mordred	cf_hh_total_non-agricultural_soil	MPNN_GO_S	in-domain	0.902618	1.23483
Mordred	cf_hh_total_non-agricultural_soil	RF	out-of-domain	1.27766	1.6029
Mordred	cf_hh_total_non-agricultural_soil	RF	in-domain	0.963483	1.28194
Mordred	cf_hh_total_non-agricultural_soil	XGB	out-of-domain	1.22752	1.49907
Mordred	cf_hh_total_non-agricultural_soil	XGB	in-domain	0.922212	1.26143
Mordred	cf_hh_total_non-urban_air_or_from_high_stacks	DeepMPT_M	in-domain	0.628275	0.855417
Mordred	cf_hh_total_non-urban_air_or_from_high_stacks	DeepMPT_M	out-of-domain	1.06194	1.0637
Mordred	cf_hh_total_non-urban_air_or_from_high_stacks	DeepMPT_S	in-domain	0.592524	0.820769
Mordred	cf_hh_total_non-urban_air_or_from_high_stacks	DeepMPT_S	out-of-domain	0.685131	0.689908
Mordred	cf_hh_total_non-urban_air_or_from_high_stacks	GP	out-of-domain	1.09686	1.39981
Mordred	cf_hh_total_non-urban_air_or_from_high_stacks	GP	in-domain	0.722268	0.988386
Mordred	cf_hh_total_non-urban_air_or_from_high_stacks	MPNN_GE_M	out-of-domain	0.969855	1.21639
Mordred	cf_hh_total_non-urban_air_or_from_high_stacks	MPNN_GE_M	in-domain	0.712767	0.912002
Mordred	cf_hh_total_non-urban_air_or_from_high_stacks	MPNN_GE_S	out-of-domain	0.906492	1.10722
Mordred	cf_hh_total_non-urban_air_or_from_high_stacks	MPNN_GE_S	in-domain	0.736141	0.925753
Mordred	cf_hh_total_non-urban_air_or_from_high_stacks	MPNN_GO_M	out-of-domain	0.879331	1.15222
Mordred	cf_hh_total_non-urban_air_or_from_high_stacks	MPNN_GO_M	in-domain	0.714633	0.914304
Mordred	cf_hh_total_non-urban_air_or_from_high_stacks	MPNN_GO_S	out-of-domain	0.983192	1.21822
Mordred	cf_hh_total_non-urban_air_or_from_high_stacks	MPNN_GO_S	in-domain	0.788479	0.986359
Mordred	cf_hh_total_non-urban_air_or_from_high_stacks	RF	out-of-domain	1.08023	1.36516
Mordred	cf_hh_total_non-urban_air_or_from_high_stacks	RF	in-domain	0.779073	1.03159
Mordred	cf_hh_total_non-urban_air_or_from_high_stacks	XGB	out-of-domain	1.04775	1.32078
Mordred	cf_hh_total_non-urban_air_or_from_high_stacks	XGB	in-domain	0.724163	0.973898
Mordred	cf_hh_total_sea_water	DeepMPT_M	in-domain	0.672902	0.933307
Mordred	cf_hh_total_sea_water	DeepMPT_M	out-of-domain	1.06086	1.09464
Mordred	cf_hh_total_sea_water	DeepMPT_S	in-domain	0.508911	0.809003
Mordred	cf_hh_total_sea_water	DeepMPT_S	out-of-domain	0.356618	0.358886
Mordred	cf_hh_total_sea_water	GP	out-of-domain	1.31966	1.69999
Mordred	cf_hh_total_sea_water	GP	in-domain	0.920253	1.37729
Mordred	cf_hh_total_sea_water	MPNN_GE_M	out-of-domain	1.14292	1.57154
Mordred	cf_hh_total_sea_water	MPNN_GE_M	in-domain	0.855001	1.16138
Mordred	cf_hh_total_sea_water	MPNN_GE_S	out-of-domain	1.06804	1.60175
Mordred	cf_hh_total_sea_water	MPNN_GE_S	in-domain	0.82477	1.11575
Mordred	cf_hh_total_sea_water	MPNN_GO_M	out-of-domain	1.23202	1.53434
Mordred	cf_hh_total_sea_water	MPNN_GO_M	in-domain	0.934486	1.32356
Mordred	cf_hh_total_sea_water	MPNN_GO_S	out-of-domain	1.26501	1.70701
Mordred	cf_hh_total_sea_water	MPNN_GO_S	in-domain	0.935391	1.3079
Mordred	cf_hh_total_sea_water	RF	out-of-domain	1.3612	1.71856
Mordred	cf_hh_total_sea_water	RF	in-domain	0.951043	1.42341
Mordred	cf_hh_total_sea_water	XGB	out-of-domain	1.27142	1.58396
Mordred	cf_hh_total_sea_water	XGB	in-domain	0.913407	1.3875
Mordred	cf_hh_total_soil_unspecified	DeepMPT_M	in-domain	0.639449	0.839736
Mordred	cf_hh_total_soil_unspecified	DeepMPT_M	out-of-domain	0.890865	0.891415
Mordred	cf_hh_total_soil_unspecified	DeepMPT_S	in-domain	0.63938	0.870145
Mordred	cf_hh_total_soil_unspecified	DeepMPT_S	out-of-domain	0.947814	0.951214
Mordred	cf_hh_total_soil_unspecified	GP	out-of-domain	1.19132	1.50914
Mordred	cf_hh_total_soil_unspecified	GP	in-domain	0.86665	1.16841
Mordred	cf_hh_total_soil_unspecified	MPNN_GE_M	out-of-domain	1.09488	1.43865
Mordred	cf_hh_total_soil_unspecified	MPNN_GE_M	in-domain	0.805097	1.10178
Mordred	cf_hh_total_soil_unspecified	MPNN_GE_S	out-of-domain	1.02486	1.33538
Mordred	cf_hh_total_soil_unspecified	MPNN_GE_S	in-domain	0.852436	1.12514
Mordred	cf_hh_total_soil_unspecified	MPNN_GO_M	out-of-domain	1.13827	1.46453
Mordred	cf_hh_total_soil_unspecified	MPNN_GO_M	in-domain	0.838723	1.10323
Mordred	cf_hh_total_soil_unspecified	MPNN_GO_S	out-of-domain	1.12046	1.5725
Mordred	cf_hh_total_soil_unspecified	MPNN_GO_S	in-domain	0.873123	1.16868
Mordred	cf_hh_total_soil_unspecified	RF	out-of-domain	1.10818	1.43847
Mordred	cf_hh_total_soil_unspecified	RF	in-domain	0.870622	1.16846
Mordred	cf_hh_total_soil_unspecified	XGB	out-of-domain	1.07513	1.36761
Mordred	cf_hh_total_soil_unspecified	XGB	in-domain	0.831463	1.12657
Mordred	cf_hh_total_urban_air_close_to_ground	DeepMPT_M	in-domain	0.674012	0.92389
Mordred	cf_hh_total_urban_air_close_to_ground	DeepMPT_M	out-of-domain	0.787167	0.851297
Mordred	cf_hh_total_urban_air_close_to_ground	DeepMPT_S	in-domain	0.599431	0.79033
Mordred	cf_hh_total_urban_air_close_to_ground	DeepMPT_S	out-of-domain	0.576517	0.599871
Mordred	cf_hh_total_urban_air_close_to_ground	GP	out-of-domain	0.967031	1.22407
Mordred	cf_hh_total_urban_air_close_to_ground	GP	in-domain	0.672785	0.908181
Mordred	cf_hh_total_urban_air_close_to_ground	MPNN_GE_M	out-of-domain	0.793091	0.967424
Mordred	cf_hh_total_urban_air_close_to_ground	MPNN_GE_M	in-domain	0.624823	0.799846
Mordred	cf_hh_total_urban_air_close_to_ground	MPNN_GE_S	out-of-domain	0.731627	0.946982
Mordred	cf_hh_total_urban_air_close_to_ground	MPNN_GE_S	in-domain	0.672242	0.875756
Mordred	cf_hh_total_urban_air_close_to_ground	MPNN_GO_M	out-of-domain	0.701333	0.948505
Mordred	cf_hh_total_urban_air_close_to_ground	MPNN_GO_M	in-domain	0.633308	0.816312
Mordred	cf_hh_total_urban_air_close_to_ground	MPNN_GO_S	out-of-domain	0.691367	0.880656
Mordred	cf_hh_total_urban_air_close_to_ground	MPNN_GO_S	in-domain	0.657288	0.840247
Mordred	cf_hh_total_urban_air_close_to_ground	RF	out-of-domain	0.947458	1.2026
Mordred	cf_hh_total_urban_air_close_to_ground	RF	in-domain	0.697413	0.924684
Mordred	cf_hh_total_urban_air_close_to_ground	XGB	out-of-domain	0.941934	1.16628
Mordred	cf_hh_total_urban_air_close_to_ground	XGB	in-domain	0.65891	0.881231
Mordred	cf_hh_total_water_unspecified	DeepMPT_M	in-domain	0.638541	0.84331
Mordred	cf_hh_total_water_unspecified	DeepMPT_M	out-of-domain	0.751403	0.764287
Mordred	cf_hh_total_water_unspecified	DeepMPT_S	in-domain	0.564551	0.787789
Mordred	cf_hh_total_water_unspecified	DeepMPT_S	out-of-domain	1.05707	1.05848
Mordred	cf_hh_total_water_unspecified	GP	out-of-domain	1.10826	1.41396
Mordred	cf_hh_total_water_unspecified	GP	in-domain	0.733276	1.01058
Mordred	cf_hh_total_water_unspecified	MPNN_GE_M	out-of-domain	0.958744	1.24966
Mordred	cf_hh_total_water_unspecified	MPNN_GE_M	in-domain	0.704296	0.935056
Mordred	cf_hh_total_water_unspecified	MPNN_GE_S	out-of-domain	0.927967	1.15498
Mordred	cf_hh_total_water_unspecified	MPNN_GE_S	in-domain	0.67866	0.911681
Mordred	cf_hh_total_water_unspecified	MPNN_GO_M	out-of-domain	0.924503	1.17757
Mordred	cf_hh_total_water_unspecified	MPNN_GO_M	in-domain	0.745043	0.98187
Mordred	cf_hh_total_water_unspecified	MPNN_GO_S	out-of-domain	0.925858	1.13943
Mordred	cf_hh_total_water_unspecified	MPNN_GO_S	in-domain	0.72852	0.962539
Mordred	cf_hh_total_water_unspecified	RF	out-of-domain	1.06697	1.34445
Mordred	cf_hh_total_water_unspecified	RF	in-domain	0.752979	1.01189
Mordred	cf_hh_total_water_unspecified	XGB	out-of-domain	1.02324	1.29247
Mordred	cf_hh_total_water_unspecified	XGB	in-domain	0.72107	0.975435
GROVER	cf_eco_agricultural_soil	DeepMPT_M	in-domain	0.634227	0.888155
GROVER	cf_eco_agricultural_soil	DeepMPT_M	out-of-domain	0.526792	0.807431
GROVER	cf_eco_agricultural_soil	DeepMPT_S	in-domain	0.629153	0.873823
GROVER	cf_eco_agricultural_soil	DeepMPT_S	out-of-domain	0.361482	0.447458
GROVER	cf_eco_agricultural_soil	GP	out-of-domain	1.43229	1.66791
GROVER	cf_eco_agricultural_soil	GP	in-domain	1.14904	1.75409
GROVER	cf_eco_agricultural_soil	RF	out-of-domain	1.03947	1.35098
GROVER	cf_eco_agricultural_soil	RF	in-domain	1.18989	1.82469
GROVER	cf_eco_agricultural_soil	XGB	out-of-domain	1.01543	1.33778
GROVER	cf_eco_agricultural_soil	XGB	in-domain	1.15965	1.79949
GROVER	cf_eco_air_indoor	DeepMPT_M	in-domain	0.561873	0.796727
GROVER	cf_eco_air_indoor	DeepMPT_M	out-of-domain	0.573251	0.885487
GROVER	cf_eco_air_indoor	DeepMPT_S	in-domain	0.588337	0.821133
GROVER	cf_eco_air_indoor	DeepMPT_S	out-of-domain	0.614462	0.701744
GROVER	cf_eco_air_indoor	GP	out-of-domain	1.16979	1.55233
GROVER	cf_eco_air_indoor	GP	in-domain	1.05876	1.47359
GROVER	cf_eco_air_indoor	RF	out-of-domain	1.24538	1.58499
GROVER	cf_eco_air_indoor	RF	in-domain	1.08383	1.50306
GROVER	cf_eco_air_indoor	XGB	out-of-domain	1.18788	1.54021
GROVER	cf_eco_air_indoor	XGB	in-domain	1.04995	1.47449
GROVER	cf_eco_air_unspecified	DeepMPT_M	in-domain	0.550653	0.774534
GROVER	cf_eco_air_unspecified	DeepMPT_M	out-of-domain	0.577028	0.890661
GROVER	cf_eco_air_unspecified	DeepMPT_S	in-domain	0.551522	0.769539
GROVER	cf_eco_air_unspecified	DeepMPT_S	out-of-domain	0.386565	0.59906
GROVER	cf_eco_air_unspecified	GP	out-of-domain	0.815226	1.12146
GROVER	cf_eco_air_unspecified	GP	in-domain	1.00927	1.51039
GROVER	cf_eco_air_unspecified	RF	out-of-domain	1.14706	1.5145
GROVER	cf_eco_air_unspecified	RF	in-domain	1.05196	1.58597
GROVER	cf_eco_air_unspecified	XGB	out-of-domain	1.15363	1.50083
GROVER	cf_eco_air_unspecified	XGB	in-domain	1.01007	1.53436
GROVER	cf_eco_fresh_water	DeepMPT_M	in-domain	0.548062	0.770539
GROVER	cf_eco_fresh_water	DeepMPT_M	out-of-domain	0.611199	0.931746
GROVER	cf_eco_fresh_water	DeepMPT_S	in-domain	0.556809	0.789446
GROVER	cf_eco_fresh_water	DeepMPT_S	out-of-domain	0.865249	1.10764
GROVER	cf_eco_fresh_water	GP	out-of-domain	0.437029	0.595503
GROVER	cf_eco_fresh_water	GP	in-domain	0.888655	1.42476
GROVER	cf_eco_fresh_water	RF	out-of-domain	0.85477	1.14508
GROVER	cf_eco_fresh_water	RF	in-domain	0.935829	1.52538
GROVER	cf_eco_fresh_water	XGB	out-of-domain	0.894654	1.2443
GROVER	cf_eco_fresh_water	XGB	in-domain	0.895086	1.48708
GROVER	cf_eco_lower_stratosphere_and_upper_troposphere	DeepMPT_M	in-domain	0.568223	0.796956
GROVER	cf_eco_lower_stratosphere_and_upper_troposphere	DeepMPT_M	out-of-domain	0.547769	0.848527
GROVER	cf_eco_lower_stratosphere_and_upper_troposphere	DeepMPT_S	in-domain	0.478178	0.636443
GROVER	cf_eco_lower_stratosphere_and_upper_troposphere	DeepMPT_S	out-of-domain	0.576395	0.773594
GROVER	cf_eco_lower_stratosphere_and_upper_troposphere	GP	out-of-domain	0.871868	1.07421
GROVER	cf_eco_lower_stratosphere_and_upper_troposphere	GP	in-domain	1.03183	1.58615
GROVER	cf_eco_lower_stratosphere_and_upper_troposphere	RF	out-of-domain	1.17996	1.4748
GROVER	cf_eco_lower_stratosphere_and_upper_troposphere	RF	in-domain	1.08207	1.69776
GROVER	cf_eco_lower_stratosphere_and_upper_troposphere	XGB	out-of-domain	1.17034	1.42325
GROVER	cf_eco_lower_stratosphere_and_upper_troposphere	XGB	in-domain	1.04206	1.63604
GROVER	cf_eco_non-agricultural_soil	DeepMPT_M	in-domain	0.628753	0.88125
GROVER	cf_eco_non-agricultural_soil	DeepMPT_M	out-of-domain	0.537912	0.821915
GROVER	cf_eco_non-agricultural_soil	DeepMPT_S	in-domain	0.603488	0.813416
GROVER	cf_eco_non-agricultural_soil	DeepMPT_S	out-of-domain	0.765932	0.917186
GROVER	cf_eco_non-agricultural_soil	GP	out-of-domain	0.471745	0.575974
GROVER	cf_eco_non-agricultural_soil	GP	in-domain	1.09007	1.63841
GROVER	cf_eco_non-agricultural_soil	RF	out-of-domain	1.10187	1.47734
GROVER	cf_eco_non-agricultural_soil	RF	in-domain	1.14994	1.75292
GROVER	cf_eco_non-agricultural_soil	XGB	out-of-domain	1.05227	1.44531
GROVER	cf_eco_non-agricultural_soil	XGB	in-domain	1.09463	1.68503
GROVER	cf_eco_non-urban_air_or_from_high_stacks	DeepMPT_M	in-domain	0.564669	0.795051
GROVER	cf_eco_non-urban_air_or_from_high_stacks	DeepMPT_M	out-of-domain	0.548893	0.846866
GROVER	cf_eco_non-urban_air_or_from_high_stacks	DeepMPT_S	in-domain	0.582758	0.811964
GROVER	cf_eco_non-urban_air_or_from_high_stacks	DeepMPT_S	out-of-domain	0.571387	0.595898
GROVER	cf_eco_non-urban_air_or_from_high_stacks	GP	out-of-domain	0.88164	1.15329
GROVER	cf_eco_non-urban_air_or_from_high_stacks	GP	in-domain	1.02403	1.51873
GROVER	cf_eco_non-urban_air_or_from_high_stacks	RF	out-of-domain	1.15081	1.48305
GROVER	cf_eco_non-urban_air_or_from_high_stacks	RF	in-domain	1.07131	1.62324
GROVER	cf_eco_non-urban_air_or_from_high_stacks	XGB	out-of-domain	1.0632	1.40605
GROVER	cf_eco_non-urban_air_or_from_high_stacks	XGB	in-domain	1.02641	1.57385
GROVER	cf_eco_sea_water	DeepMPT_M	in-domain	0.498305	0.678718
GROVER	cf_eco_sea_water	DeepMPT_M	out-of-domain	0.48682	0.733965
GROVER	cf_eco_sea_water	DeepMPT_S	in-domain	0.491038	0.697526
GROVER	cf_eco_sea_water	DeepMPT_S	out-of-domain	0.364475	0.418228
GROVER	cf_eco_sea_water	GP	out-of-domain	2.69919	3.38787
GROVER	cf_eco_sea_water	GP	in-domain	1.96166	2.87991
GROVER	cf_eco_sea_water	RF	out-of-domain	2.42433	2.92771
GROVER	cf_eco_sea_water	RF	in-domain	2.24649	3.17791
GROVER	cf_eco_sea_water	XGB	out-of-domain	2.32267	2.89951
GROVER	cf_eco_sea_water	XGB	in-domain	2.04532	2.98073
GROVER	cf_eco_soil_unspecified	DeepMPT_M	in-domain	0.629206	0.880424
GROVER	cf_eco_soil_unspecified	DeepMPT_M	out-of-domain	0.534587	0.809402
GROVER	cf_eco_soil_unspecified	DeepMPT_S	in-domain	0.616751	0.854627
GROVER	cf_eco_soil_unspecified	DeepMPT_S	out-of-domain	0.883862	1.16096
GROVER	cf_eco_soil_unspecified	GP	out-of-domain	0.440587	0.559859
GROVER	cf_eco_soil_unspecified	GP	in-domain	1.08571	1.63587
GROVER	cf_eco_soil_unspecified	RF	out-of-domain	1.09353	1.49278
GROVER	cf_eco_soil_unspecified	RF	in-domain	1.13473	1.73396
GROVER	cf_eco_soil_unspecified	XGB	out-of-domain	1.12763	1.51765
GROVER	cf_eco_soil_unspecified	XGB	in-domain	1.08968	1.68384
GROVER	cf_eco_urban_air_close_to_ground	DeepMPT_M	in-domain	0.554211	0.778459
GROVER	cf_eco_urban_air_close_to_ground	DeepMPT_M	out-of-domain	0.609975	0.879601
GROVER	cf_eco_urban_air_close_to_ground	DeepMPT_S	in-domain	0.585863	0.803506
GROVER	cf_eco_urban_air_close_to_ground	DeepMPT_S	out-of-domain	0.448488	0.49259
GROVER	cf_eco_urban_air_close_to_ground	GP	out-of-domain	0.846607	1.10749
GROVER	cf_eco_urban_air_close_to_ground	GP	in-domain	1.00398	1.49599
GROVER	cf_eco_urban_air_close_to_ground	RF	out-of-domain	1.09709	1.47279
GROVER	cf_eco_urban_air_close_to_ground	RF	in-domain	1.06162	1.59727
GROVER	cf_eco_urban_air_close_to_ground	XGB	out-of-domain	1.13409	1.49295
GROVER	cf_eco_urban_air_close_to_ground	XGB	in-domain	1.00917	1.53068
GROVER	cf_eco_water_unspecified	DeepMPT_M	in-domain	0.548712	0.768911
GROVER	cf_eco_water_unspecified	DeepMPT_M	out-of-domain	0.610166	0.929224
GROVER	cf_eco_water_unspecified	DeepMPT_S	in-domain	0.572854	0.827483
GROVER	cf_eco_water_unspecified	DeepMPT_S	out-of-domain	0.644839	0.766627
GROVER	cf_eco_water_unspecified	GP	out-of-domain	1.02752	1.30824
GROVER	cf_eco_water_unspecified	GP	in-domain	0.965949	1.65327
GROVER	cf_eco_water_unspecified	RF	out-of-domain	0.915804	1.19464
GROVER	cf_eco_water_unspecified	RF	in-domain	1.01197	1.72255
GROVER	cf_eco_water_unspecified	XGB	out-of-domain	0.907685	1.17498
GROVER	cf_eco_water_unspecified	XGB	in-domain	0.944614	1.6804
GROVER	cf_hh_total_agricultural_soil	DeepMPT_M	in-domain	0.605337	0.794095
GROVER	cf_hh_total_agricultural_soil	DeepMPT_M	out-of-domain	0.530922	0.597978
GROVER	cf_hh_total_agricultural_soil	DeepMPT_S	in-domain	0.592953	0.781087
GROVER	cf_hh_total_agricultural_soil	DeepMPT_S	out-of-domain	0.0770933	0.0770933
GROVER	cf_hh_total_agricultural_soil	GP	out-of-domain	0.854325	1.10905
GROVER	cf_hh_total_agricultural_soil	GP	in-domain	0.913957	1.18599
GROVER	cf_hh_total_agricultural_soil	RF	out-of-domain	0.995052	1.27822
GROVER	cf_hh_total_agricultural_soil	RF	in-domain	0.948498	1.2446
GROVER	cf_hh_total_agricultural_soil	XGB	out-of-domain	0.993225	1.26857
GROVER	cf_hh_total_agricultural_soil	XGB	in-domain	0.915474	1.19624
GROVER	cf_hh_total_air_indoor	DeepMPT_M	in-domain	0.633828	0.819804
GROVER	cf_hh_total_air_indoor	DeepMPT_M	out-of-domain	0.796136	0.96351
GROVER	cf_hh_total_air_indoor	DeepMPT_S	in-domain	0.653836	0.82201
GROVER	cf_hh_total_air_indoor	DeepMPT_S	out-of-domain	0.265918	0.265918
GROVER	cf_hh_total_air_indoor	GP	out-of-domain	0.933185	0.98293
GROVER	cf_hh_total_air_indoor	GP	in-domain	0.709589	0.945877
GROVER	cf_hh_total_air_indoor	RF	out-of-domain	0.892837	1.13413
GROVER	cf_hh_total_air_indoor	RF	in-domain	0.729904	0.973346
GROVER	cf_hh_total_air_indoor	XGB	out-of-domain	0.942579	1.14712
GROVER	cf_hh_total_air_indoor	XGB	in-domain	0.683202	0.931484
GROVER	cf_hh_total_air_unspecified	DeepMPT_M	in-domain	0.620363	0.809442
GROVER	cf_hh_total_air_unspecified	DeepMPT_M	out-of-domain	0.641524	0.759004
GROVER	cf_hh_total_air_unspecified	DeepMPT_S	in-domain	0.642268	0.804803
GROVER	cf_hh_total_air_unspecified	DeepMPT_S	out-of-domain	0.155753	0.155753
GROVER	cf_hh_total_air_unspecified	GP	out-of-domain	0.938459	0.986663
GROVER	cf_hh_total_air_unspecified	GP	in-domain	0.704742	0.93144
GROVER	cf_hh_total_air_unspecified	RF	out-of-domain	0.885789	1.14527
GROVER	cf_hh_total_air_unspecified	RF	in-domain	0.741829	0.97438
GROVER	cf_hh_total_air_unspecified	XGB	out-of-domain	0.874441	1.11279
GROVER	cf_hh_total_air_unspecified	XGB	in-domain	0.700264	0.923298
GROVER	cf_hh_total_fresh_water	DeepMPT_M	in-domain	0.572112	0.773237
GROVER	cf_hh_total_fresh_water	DeepMPT_M	out-of-domain	0.569837	0.766463
GROVER	cf_hh_total_fresh_water	DeepMPT_S	in-domain	0.559219	0.759162
GROVER	cf_hh_total_fresh_water	DeepMPT_S	out-of-domain	0.14427	0.14427
GROVER	cf_hh_total_fresh_water	GP	out-of-domain	0.748487	0.85892
GROVER	cf_hh_total_fresh_water	GP	in-domain	0.813563	1.07975
GROVER	cf_hh_total_fresh_water	RF	out-of-domain	0.786054	1.00243
GROVER	cf_hh_total_fresh_water	RF	in-domain	0.863341	1.14676
GROVER	cf_hh_total_fresh_water	XGB	out-of-domain	0.762289	0.992114
GROVER	cf_hh_total_fresh_water	XGB	in-domain	0.832643	1.11213
GROVER	cf_hh_total_lower_stratosphere_and_upper_troposphere	DeepMPT_M	in-domain	0.628801	0.809151
GROVER	cf_hh_total_lower_stratosphere_and_upper_troposphere	DeepMPT_M	out-of-domain	0.50998	0.619723
GROVER	cf_hh_total_lower_stratosphere_and_upper_troposphere	DeepMPT_S	in-domain	0.602877	0.76369
GROVER	cf_hh_total_lower_stratosphere_and_upper_troposphere	DeepMPT_S	out-of-domain	0.375805	0.375805
GROVER	cf_hh_total_lower_stratosphere_and_upper_troposphere	GP	out-of-domain	1.14254	1.29499
GROVER	cf_hh_total_lower_stratosphere_and_upper_troposphere	GP	in-domain	0.772466	1.01435
GROVER	cf_hh_total_lower_stratosphere_and_upper_troposphere	RF	out-of-domain	1.00244	1.26771
GROVER	cf_hh_total_lower_stratosphere_and_upper_troposphere	RF	in-domain	0.832348	1.0797
GROVER	cf_hh_total_lower_stratosphere_and_upper_troposphere	XGB	out-of-domain	0.982456	1.24639
GROVER	cf_hh_total_lower_stratosphere_and_upper_troposphere	XGB	in-domain	0.761664	0.994123
GROVER	cf_hh_total_non-agricultural_soil	DeepMPT_M	in-domain	0.588912	0.774917
GROVER	cf_hh_total_non-agricultural_soil	DeepMPT_M	out-of-domain	0.469019	0.509632
GROVER	cf_hh_total_non-agricultural_soil	DeepMPT_S	in-domain	0.602826	0.79064
GROVER	cf_hh_total_non-agricultural_soil	DeepMPT_S	out-of-domain	0.502952	0.502952
GROVER	cf_hh_total_non-agricultural_soil	GP	out-of-domain	0.942516	1.08349
GROVER	cf_hh_total_non-agricultural_soil	GP	in-domain	1.04203	1.34887
GROVER	cf_hh_total_non-agricultural_soil	RF	out-of-domain	1.0162	1.28186
GROVER	cf_hh_total_non-agricultural_soil	RF	in-domain	1.06392	1.41897
GROVER	cf_hh_total_non-agricultural_soil	XGB	out-of-domain	0.981955	1.25188
GROVER	cf_hh_total_non-agricultural_soil	XGB	in-domain	1.02522	1.35824
GROVER	cf_hh_total_non-urban_air_or_from_high_stacks	DeepMPT_M	in-domain	0.632041	0.815673
GROVER	cf_hh_total_non-urban_air_or_from_high_stacks	DeepMPT_M	out-of-domain	0.497895	0.591944
GROVER	cf_hh_total_non-urban_air_or_from_high_stacks	DeepMPT_S	in-domain	0.594155	0.759315
GROVER	cf_hh_total_non-urban_air_or_from_high_stacks	DeepMPT_S	out-of-domain	0.341738	0.341738
GROVER	cf_hh_total_non-urban_air_or_from_high_stacks	GP	out-of-domain	1.14349	1.29472
GROVER	cf_hh_total_non-urban_air_or_from_high_stacks	GP	in-domain	0.771425	1.01378
GROVER	cf_hh_total_non-urban_air_or_from_high_stacks	RF	out-of-domain	0.97475	1.24342
GROVER	cf_hh_total_non-urban_air_or_from_high_stacks	RF	in-domain	0.828609	1.07558
GROVER	cf_hh_total_non-urban_air_or_from_high_stacks	XGB	out-of-domain	0.9491	1.19526
GROVER	cf_hh_total_non-urban_air_or_from_high_stacks	XGB	in-domain	0.769636	1.00656
GROVER	cf_hh_total_sea_water	DeepMPT_M	in-domain	0.513237	0.73374
GROVER	cf_hh_total_sea_water	DeepMPT_M	out-of-domain	0.401238	0.543894
GROVER	cf_hh_total_sea_water	DeepMPT_S	in-domain	0.51015	0.726928
GROVER	cf_hh_total_sea_water	DeepMPT_S	out-of-domain	0.352196	0.352196
GROVER	cf_hh_total_sea_water	GP	out-of-domain	1.06615	1.3717
GROVER	cf_hh_total_sea_water	GP	in-domain	1.05885	1.44656
GROVER	cf_hh_total_sea_water	RF	out-of-domain	1.02962	1.28728
GROVER	cf_hh_total_sea_water	RF	in-domain	1.11891	1.54881
GROVER	cf_hh_total_sea_water	XGB	out-of-domain	0.919984	1.17019
GROVER	cf_hh_total_sea_water	XGB	in-domain	1.08973	1.51332
GROVER	cf_hh_total_soil_unspecified	DeepMPT_M	in-domain	0.598569	0.792285
GROVER	cf_hh_total_soil_unspecified	DeepMPT_M	out-of-domain	0.494878	0.582862
GROVER	cf_hh_total_soil_unspecified	DeepMPT_S	in-domain	0.605014	0.797579
GROVER	cf_hh_total_soil_unspecified	DeepMPT_S	out-of-domain	0.408739	0.408739
GROVER	cf_hh_total_soil_unspecified	GP	out-of-domain	0.860555	1.09835
GROVER	cf_hh_total_soil_unspecified	GP	in-domain	0.919454	1.1902
GROVER	cf_hh_total_soil_unspecified	RF	out-of-domain	1.00633	1.30035
GROVER	cf_hh_total_soil_unspecified	RF	in-domain	0.95211	1.25327
GROVER	cf_hh_total_soil_unspecified	XGB	out-of-domain	0.965898	1.24894
GROVER	cf_hh_total_soil_unspecified	XGB	in-domain	0.916504	1.1989
GROVER	cf_hh_total_urban_air_close_to_ground	DeepMPT_M	in-domain	0.615483	0.805155
GROVER	cf_hh_total_urban_air_close_to_ground	DeepMPT_M	out-of-domain	0.671002	0.806683
GROVER	cf_hh_total_urban_air_close_to_ground	DeepMPT_S	in-domain	0.654591	0.808117
GROVER	cf_hh_total_urban_air_close_to_ground	DeepMPT_S	out-of-domain	0.0139092	0.0139092
GROVER	cf_hh_total_urban_air_close_to_ground	GP	out-of-domain	0.914921	0.95885
GROVER	cf_hh_total_urban_air_close_to_ground	GP	in-domain	0.700932	0.927456
GROVER	cf_hh_total_urban_air_close_to_ground	RF	out-of-domain	0.867984	1.10705
GROVER	cf_hh_total_urban_air_close_to_ground	RF	in-domain	0.737878	0.97304
GROVER	cf_hh_total_urban_air_close_to_ground	XGB	out-of-domain	0.895846	1.13689
GROVER	cf_hh_total_urban_air_close_to_ground	XGB	in-domain	0.687948	0.922139
GROVER	cf_hh_total_water_unspecified	DeepMPT_M	in-domain	0.578354	0.783621
GROVER	cf_hh_total_water_unspecified	DeepMPT_M	out-of-domain	0.577379	0.779868
GROVER	cf_hh_total_water_unspecified	DeepMPT_S	in-domain	0.575526	0.778093
GROVER	cf_hh_total_water_unspecified	DeepMPT_S	out-of-domain	0.289309	0.289309
GROVER	cf_hh_total_water_unspecified	GP	out-of-domain	0.731537	0.852284
GROVER	cf_hh_total_water_unspecified	GP	in-domain	0.816114	1.08104
GROVER	cf_hh_total_water_unspecified	RF	out-of-domain	0.775933	0.987061
GROVER	cf_hh_total_water_unspecified	RF	in-domain	0.86635	1.14622
GROVER	cf_hh_total_water_unspecified	XGB	out-of-domain	0.794258	1.00752
GROVER	cf_hh_total_water_unspecified	XGB	in-domain	0.815875	1.09967

## Sheet: predicted
	Target	name	CAS.Number	prediction_original	literation
0	eco: agri soil	Ceric sulfate tetrahydrate	10294-42-5	34.6479
1	eco: air indoor	Ceric sulfate tetrahydrate	10294-42-5	1.37638
2	eco: air unspec.	Ceric sulfate tetrahydrate	10294-42-5	1.43985
3	eco: fresh water	Ceric sulfate tetrahydrate	10294-42-5	175.282
4	eco: stratosphere/troposphere	Ceric sulfate tetrahydrate	10294-42-5	3.79186
5	eco: non-agri soil	Ceric sulfate tetrahydrate	10294-42-5	54.6754
6	eco: non-urban/high stacks	Ceric sulfate tetrahydrate	10294-42-5	0.886403
7	eco: sea water	Ceric sulfate tetrahydrate	10294-42-5	0.000547103
8	eco: soil unspec.	Ceric sulfate tetrahydrate	10294-42-5	55.2891
9	eco: urban air	Ceric sulfate tetrahydrate	10294-42-5	7.93557
10	eco: water unspec.	Ceric sulfate tetrahydrate	10294-42-5	205.984
11	hh: agri soil	Ceric sulfate tetrahydrate	10294-42-5	1.18953e-07
12	hh: air indoor	Ceric sulfate tetrahydrate	10294-42-5	0.000484226
13	hh: air unspec.	Ceric sulfate tetrahydrate	10294-42-5	0.000511602
14	hh: fresh water	Ceric sulfate tetrahydrate	10294-42-5	5.19308e-07
15	hh: stratosphere/troposphere	Ceric sulfate tetrahydrate	10294-42-5	1.96291e-07
16	hh: non-agri soil	Ceric sulfate tetrahydrate	10294-42-5	1.98769e-08
17	hh: non-urban/high stacks	Ceric sulfate tetrahydrate	10294-42-5	1.95564e-07
18	hh: sea water	Ceric sulfate tetrahydrate	10294-42-5	1.34065e-11
19	hh: soil unspec.	Ceric sulfate tetrahydrate	10294-42-5	7.58711e-08
20	hh: urban air	Ceric sulfate tetrahydrate	10294-42-5	7.85798e-05
21	hh: water unspec.	Ceric sulfate tetrahydrate	10294-42-5	2.69346e-07
22	eco: agri soil	2-Phenoxyethanol	122-99-6	11.8264
23	eco: air indoor	2-Phenoxyethanol	122-99-6	10.3251
24	eco: air unspec.	2-Phenoxyethanol	122-99-6	35.2825
25	eco: fresh water	2-Phenoxyethanol	122-99-6	561.759
26	eco: stratosphere/troposphere	2-Phenoxyethanol	122-99-6	11.4171
27	eco: non-agri soil	2-Phenoxyethanol	122-99-6	62.4252
28	eco: non-urban/high stacks	2-Phenoxyethanol	122-99-6	24.0556
29	eco: sea water	2-Phenoxyethanol	122-99-6	0.000940105
30	eco: soil unspec.	2-Phenoxyethanol	122-99-6	59.7703
31	eco: urban air	2-Phenoxyethanol	122-99-6	13.7761
32	eco: water unspec.	2-Phenoxyethanol	122-99-6	781.554
33	hh: agri soil	2-Phenoxyethanol	122-99-6	8.13515e-08
34	hh: air indoor	2-Phenoxyethanol	122-99-6	6.52226e-05
35	hh: air unspec.	2-Phenoxyethanol	122-99-6	3.12882e-07
36	hh: fresh water	2-Phenoxyethanol	122-99-6	1.59028e-07
37	hh: stratosphere/troposphere	2-Phenoxyethanol	122-99-6	6.99091e-08
38	hh: non-agri soil	2-Phenoxyethanol	122-99-6	8.91121e-09
39	hh: non-urban/high stacks	2-Phenoxyethanol	122-99-6	6.57499e-08
40	hh: sea water	2-Phenoxyethanol	122-99-6	8.1473e-21
41	hh: soil unspec.	2-Phenoxyethanol	122-99-6	5.3303e-08
42	hh: urban air	2-Phenoxyethanol	122-99-6	6.09929e-07
43	hh: water unspec.	2-Phenoxyethanol	122-99-6	6.34089e-08
44	eco: agri soil	2-methyl-4-isothiazolin-3-one	2682-20-4	881.008
45	eco: air indoor	2-methyl-4-isothiazolin-3-one	2682-20-4	801.87
46	eco: air unspec.	2-methyl-4-isothiazolin-3-one	2682-20-4	88.2941
47	eco: fresh water	2-methyl-4-isothiazolin-3-one	2682-20-4	740.424
48	eco: stratosphere/troposphere	2-methyl-4-isothiazolin-3-one	2682-20-4	1642.58
49	eco: non-agri soil	2-methyl-4-isothiazolin-3-one	2682-20-4	54.1078
50	eco: non-urban/high stacks	2-methyl-4-isothiazolin-3-one	2682-20-4	226.874
51	eco: sea water	2-methyl-4-isothiazolin-3-one	2682-20-4	0.0242984
52	eco: soil unspec.	2-methyl-4-isothiazolin-3-one	2682-20-4	54.7201
53	eco: urban air	2-methyl-4-isothiazolin-3-one	2682-20-4	42.9364
54	eco: water unspec.	2-methyl-4-isothiazolin-3-one	2682-20-4	1212.49
55	hh: agri soil	2-methyl-4-isothiazolin-3-one	2682-20-4	1.21279e-06
56	hh: air indoor	2-methyl-4-isothiazolin-3-one	2682-20-4	0.000253931
57	hh: air unspec.	2-methyl-4-isothiazolin-3-one	2682-20-4	4.20089e-06
58	hh: fresh water	2-methyl-4-isothiazolin-3-one	2682-20-4	3.64496e-06
59	hh: stratosphere/troposphere	2-methyl-4-isothiazolin-3-one	2682-20-4	1.45465e-06
60	hh: non-agri soil	2-methyl-4-isothiazolin-3-one	2682-20-4	3.26453e-07
61	hh: non-urban/high stacks	2-methyl-4-isothiazolin-3-one	2682-20-4	1.47494e-06
62	hh: sea water	2-methyl-4-isothiazolin-3-one	2682-20-4	2.80371e-09
63	hh: soil unspec.	2-methyl-4-isothiazolin-3-one	2682-20-4	5.12237e-07
64	hh: urban air	2-methyl-4-isothiazolin-3-one	2682-20-4	6.84384e-06
65	hh: water unspec.	2-methyl-4-isothiazolin-3-one	2682-20-4	1.82359e-06
66	eco: agri soil	Poly(oxy-1,2-ethanediyl),Î±-hydro-Ï‰-hydroxy- Ethane-1,2-diol, ethoxylated	25322-68-3	10.3469
67	eco: air indoor	Poly(oxy-1,2-ethanediyl),Î±-hydro-Ï‰-hydroxy- Ethane-1,2-diol, ethoxylated	25322-68-3	1.72389
68	eco: air unspec.	Poly(oxy-1,2-ethanediyl),Î±-hydro-Ï‰-hydroxy- Ethane-1,2-diol, ethoxylated	25322-68-3	3.08679
69	eco: fresh water	Poly(oxy-1,2-ethanediyl),Î±-hydro-Ï‰-hydroxy- Ethane-1,2-diol, ethoxylated	25322-68-3	43.1947
70	eco: stratosphere/troposphere	Poly(oxy-1,2-ethanediyl),Î±-hydro-Ï‰-hydroxy- Ethane-1,2-diol, ethoxylated	25322-68-3	3.16164
71	eco: non-agri soil	Poly(oxy-1,2-ethanediyl),Î±-hydro-Ï‰-hydroxy- Ethane-1,2-diol, ethoxylated	25322-68-3	6.73769
72	eco: non-urban/high stacks	Poly(oxy-1,2-ethanediyl),Î±-hydro-Ï‰-hydroxy- Ethane-1,2-diol, ethoxylated	25322-68-3	3.34496
73	eco: sea water	Poly(oxy-1,2-ethanediyl),Î±-hydro-Ï‰-hydroxy- Ethane-1,2-diol, ethoxylated	25322-68-3	2.35405e-05
74	eco: soil unspec.	Poly(oxy-1,2-ethanediyl),Î±-hydro-Ï‰-hydroxy- Ethane-1,2-diol, ethoxylated	25322-68-3	9.5301
75	eco: urban air	Poly(oxy-1,2-ethanediyl),Î±-hydro-Ï‰-hydroxy- Ethane-1,2-diol, ethoxylated	25322-68-3	2.24152
76	eco: water unspec.	Poly(oxy-1,2-ethanediyl),Î±-hydro-Ï‰-hydroxy- Ethane-1,2-diol, ethoxylated	25322-68-3	23.3363
77	hh: agri soil	Poly(oxy-1,2-ethanediyl),Î±-hydro-Ï‰-hydroxy- Ethane-1,2-diol, ethoxylated	25322-68-3	1.13102e-08
78	hh: air indoor	Poly(oxy-1,2-ethanediyl),Î±-hydro-Ï‰-hydroxy- Ethane-1,2-diol, ethoxylated	25322-68-3	2.53648e-06
79	hh: air unspec.	Poly(oxy-1,2-ethanediyl),Î±-hydro-Ï‰-hydroxy- Ethane-1,2-diol, ethoxylated	25322-68-3	1.85559e-08
80	hh: fresh water	Poly(oxy-1,2-ethanediyl),Î±-hydro-Ï‰-hydroxy- Ethane-1,2-diol, ethoxylated	25322-68-3	7.84804e-09
81	hh: stratosphere/troposphere	Poly(oxy-1,2-ethanediyl),Î±-hydro-Ï‰-hydroxy- Ethane-1,2-diol, ethoxylated	25322-68-3	4.63467e-09
82	hh: non-agri soil	Poly(oxy-1,2-ethanediyl),Î±-hydro-Ï‰-hydroxy- Ethane-1,2-diol, ethoxylated	25322-68-3	3.24314e-09
83	hh: non-urban/high stacks	Poly(oxy-1,2-ethanediyl),Î±-hydro-Ï‰-hydroxy- Ethane-1,2-diol, ethoxylated	25322-68-3	6.19655e-09
84	hh: sea water	Poly(oxy-1,2-ethanediyl),Î±-hydro-Ï‰-hydroxy- Ethane-1,2-diol, ethoxylated	25322-68-3	5.89278e-23
85	hh: soil unspec.	Poly(oxy-1,2-ethanediyl),Î±-hydro-Ï‰-hydroxy- Ethane-1,2-diol, ethoxylated	25322-68-3	7.82577e-09
86	hh: urban air	Poly(oxy-1,2-ethanediyl),Î±-hydro-Ï‰-hydroxy- Ethane-1,2-diol, ethoxylated	25322-68-3	3.06681e-08
87	hh: water unspec.	Poly(oxy-1,2-ethanediyl),Î±-hydro-Ï‰-hydroxy- Ethane-1,2-diol, ethoxylated	25322-68-3	3.69351e-09
88	eco: agri soil	Benzenesulfonic acid, C10-13-alkyl derivs., sodium salts	68411-30-3	153.447
89	eco: air indoor	Benzenesulfonic acid, C10-13-alkyl derivs., sodium salts	68411-30-3	278.636
90	eco: air unspec.	Benzenesulfonic acid, C10-13-alkyl derivs., sodium salts	68411-30-3	580.219
91	eco: fresh water	Benzenesulfonic acid, C10-13-alkyl derivs., sodium salts	68411-30-3	5544.32
92	eco: stratosphere/troposphere	Benzenesulfonic acid, C10-13-alkyl derivs., sodium salts	68411-30-3	566.421
93	eco: non-agri soil	Benzenesulfonic acid, C10-13-alkyl derivs., sodium salts	68411-30-3	193.968
94	eco: non-urban/high stacks	Benzenesulfonic acid, C10-13-alkyl derivs., sodium salts	68411-30-3	519.96
95	eco: sea water	Benzenesulfonic acid, C10-13-alkyl derivs., sodium salts	68411-30-3	1.21608e-05
96	eco: soil unspec.	Benzenesulfonic acid, C10-13-alkyl derivs., sodium salts	68411-30-3	228.359
97	eco: urban air	Benzenesulfonic acid, C10-13-alkyl derivs., sodium salts	68411-30-3	582.513
98	eco: water unspec.	Benzenesulfonic acid, C10-13-alkyl derivs., sodium salts	68411-30-3	11992.4
99	hh: agri soil	Benzenesulfonic acid, C10-13-alkyl derivs., sodium salts	68411-30-3	1.1462e-07
100	hh: air indoor	Benzenesulfonic acid, C10-13-alkyl derivs., sodium salts	68411-30-3	6.94194e-05
101	hh: air unspec.	Benzenesulfonic acid, C10-13-alkyl derivs., sodium salts	68411-30-3	4.614e-07
102	hh: fresh water	Benzenesulfonic acid, C10-13-alkyl derivs., sodium salts	68411-30-3	4.14679e-07
103	hh: stratosphere/troposphere	Benzenesulfonic acid, C10-13-alkyl derivs., sodium salts	68411-30-3	1.38692e-07
104	hh: non-agri soil	Benzenesulfonic acid, C10-13-alkyl derivs., sodium salts	68411-30-3	1.70572e-08
105	hh: non-urban/high stacks	Benzenesulfonic acid, C10-13-alkyl derivs., sodium salts	68411-30-3	1.02625e-07
106	hh: sea water	Benzenesulfonic acid, C10-13-alkyl derivs., sodium salts	68411-30-3	1.70543e-09
107	hh: soil unspec.	Benzenesulfonic acid, C10-13-alkyl derivs., sodium salts	68411-30-3	7.24283e-08
108	hh: urban air	Benzenesulfonic acid, C10-13-alkyl derivs., sodium salts	68411-30-3	5.41547e-07
109	hh: water unspec.	Benzenesulfonic acid, C10-13-alkyl derivs., sodium salts	68411-30-3	3.97443e-07
110	eco: agri soil	Hydrogen peroxide	7722-84-1	55.6693
111	eco: air indoor	Hydrogen peroxide	7722-84-1	69.1335
112	eco: air unspec.	Hydrogen peroxide	7722-84-1	6.40189
113	eco: fresh water	Hydrogen peroxide	7722-84-1	2223.45	5320
114	eco: stratosphere/troposphere	Hydrogen peroxide	7722-84-1	4.39834
115	eco: non-agri soil	Hydrogen peroxide	7722-84-1	56.1048
116	eco: non-urban/high stacks	Hydrogen peroxide	7722-84-1	18.6803
117	eco: sea water	Hydrogen peroxide	7722-84-1	0.0568431
118	eco: soil unspec.	Hydrogen peroxide	7722-84-1	56.7903
119	eco: urban air	Hydrogen peroxide	7722-84-1	6.05422	221
120	eco: water unspec.	Hydrogen peroxide	7722-84-1	6358.72
121	hh: agri soil	Hydrogen peroxide	7722-84-1	3.87684e-08
122	hh: air indoor	Hydrogen peroxide	7722-84-1	9.99529e-06
123	hh: air unspec.	Hydrogen peroxide	7722-84-1	1.23381e-07
124	hh: fresh water	Hydrogen peroxide	7722-84-1	1.02942e-07
125	hh: stratosphere/troposphere	Hydrogen peroxide	7722-84-1	4.41093e-08
126	hh: non-agri soil	Hydrogen peroxide	7722-84-1	6.56498e-09
127	hh: non-urban/high stacks	Hydrogen peroxide	7722-84-1	4.4471e-08
128	hh: sea water	Hydrogen peroxide	7722-84-1	1.10887e-09
129	hh: soil unspec.	Hydrogen peroxide	7722-84-1	2.52059e-08
130	hh: urban air	Hydrogen peroxide	7722-84-1	1.87309e-07
131	hh: water unspec.	Hydrogen peroxide	7722-84-1	4.76458e-08
132	eco: agri soil	alcohols ethoxylated	61827-42-7	115.893
133	eco: air indoor	alcohols ethoxylated	61827-42-7	28.6339
134	eco: air unspec.	alcohols ethoxylated	61827-42-7	20.9288
135	eco: fresh water	alcohols ethoxylated	61827-42-7	3687.47	2740
136	eco: stratosphere/troposphere	alcohols ethoxylated	61827-42-7	15.9196
137	eco: non-agri soil	alcohols ethoxylated	61827-42-7	113.542
138	eco: non-urban/high stacks	alcohols ethoxylated	61827-42-7	10.9494
139	eco: sea water	alcohols ethoxylated	61827-42-7	0.0259776
140	eco: soil unspec.	alcohols ethoxylated	61827-42-7	111.517
141	eco: urban air	alcohols ethoxylated	61827-42-7	16.8786	87
142	eco: water unspec.	alcohols ethoxylated	61827-42-7	5515.83
143	hh: agri soil	alcohols ethoxylated	61827-42-7	9.47261e-08
144	hh: air indoor	alcohols ethoxylated	61827-42-7	4.83617e-06
145	hh: air unspec.	alcohols ethoxylated	61827-42-7	4.44177e-08
146	hh: fresh water	alcohols ethoxylated	61827-42-7	8.24026e-08
147	hh: stratosphere/troposphere	alcohols ethoxylated	61827-42-7	1.21799e-08
148	hh: non-agri soil	alcohols ethoxylated	61827-42-7	2.13179e-08
149	hh: non-urban/high stacks	alcohols ethoxylated	61827-42-7	1.35483e-08
150	hh: sea water	alcohols ethoxylated	61827-42-7	3.78937e-20
151	hh: soil unspec.	alcohols ethoxylated	61827-42-7	6.84635e-08
152	hh: urban air	alcohols ethoxylated	61827-42-7	7.00853e-08
153	hh: water unspec.	alcohols ethoxylated	61827-42-7	3.82252e-08
154	eco: agri soil	(2-methoxymethylethoxy)propanol	34590-94-8	27.5904
155	eco: air indoor	(2-methoxymethylethoxy)propanol	34590-94-8	3.85567
156	eco: air unspec.	(2-methoxymethylethoxy)propanol	34590-94-8	2.8096
157	eco: fresh water	(2-methoxymethylethoxy)propanol	34590-94-8	126.344
158	eco: stratosphere/troposphere	(2-methoxymethylethoxy)propanol	34590-94-8	2.12912
159	eco: non-agri soil	(2-methoxymethylethoxy)propanol	34590-94-8	11.299
160	eco: non-urban/high stacks	(2-methoxymethylethoxy)propanol	34590-94-8	3.40698
161	eco: sea water	(2-methoxymethylethoxy)propanol	34590-94-8	0.000526983
162	eco: soil unspec.	(2-methoxymethylethoxy)propanol	34590-94-8	9.50388
163	eco: urban air	(2-methoxymethylethoxy)propanol	34590-94-8	3.72364
164	eco: water unspec.	(2-methoxymethylethoxy)propanol	34590-94-8	304.019
165	hh: agri soil	(2-methoxymethylethoxy)propanol	34590-94-8	6.99925e-08
166	hh: air indoor	(2-methoxymethylethoxy)propanol	34590-94-8	3.50698e-08
167	hh: air unspec.	(2-methoxymethylethoxy)propanol	34590-94-8	4.65379e-08
168	hh: fresh water	(2-methoxymethylethoxy)propanol	34590-94-8	7.58798e-08
169	hh: stratosphere/troposphere	(2-methoxymethylethoxy)propanol	34590-94-8	1.34011e-08
170	hh: non-agri soil	(2-methoxymethylethoxy)propanol	34590-94-8	1.50167e-08
171	hh: non-urban/high stacks	(2-methoxymethylethoxy)propanol	34590-94-8	1.33809e-08
172	hh: sea water	(2-methoxymethylethoxy)propanol	34590-94-8	1.07006e-22
173	hh: soil unspec.	(2-methoxymethylethoxy)propanol	34590-94-8	3.48545e-08
174	hh: urban air	(2-methoxymethylethoxy)propanol	34590-94-8	7.5378e-08
175	hh: water unspec.	(2-methoxymethylethoxy)propanol	34590-94-8	3.47528e-08
176	eco: agri soil	Polyaluminium chloride	1327-41-9	131.598
177	eco: air indoor	Polyaluminium chloride	1327-41-9	18.9008
178	eco: air unspec.	Polyaluminium chloride	1327-41-9	47.5985
179	eco: fresh water	Polyaluminium chloride	1327-41-9	2183.68
180	eco: stratosphere/troposphere	Polyaluminium chloride	1327-41-9	13.3367
181	eco: non-agri soil	Polyaluminium chloride	1327-41-9	127.426
182	eco: non-urban/high stacks	Polyaluminium chloride	1327-41-9	28.89
183	eco: sea water	Polyaluminium chloride	1327-41-9	0.000557569
184	eco: soil unspec.	Polyaluminium chloride	1327-41-9	132.73
185	eco: urban air	Polyaluminium chloride	1327-41-9	53.3499
186	eco: water unspec.	Polyaluminium chloride	1327-41-9	1943.04
187	hh: agri soil	Polyaluminium chloride	1327-41-9	0.333353
188	hh: air indoor	Polyaluminium chloride	1327-41-9	0.334792
189	hh: air unspec.	Polyaluminium chloride	1327-41-9	0.333398
190	hh: fresh water	Polyaluminium chloride	1327-41-9	0.000106167
191	hh: stratosphere/troposphere	Polyaluminium chloride	1327-41-9	0.333333
192	hh: non-agri soil	Polyaluminium chloride	1327-41-9	1.6063e-05
193	hh: non-urban/high stacks	Polyaluminium chloride	1327-41-9	0.333333
194	hh: sea water	Polyaluminium chloride	1327-41-9	4.35402e-08
195	hh: soil unspec.	Polyaluminium chloride	1327-41-9	3.21184e-05
196	hh: urban air	Polyaluminium chloride	1327-41-9	0.333402
197	hh: water unspec.	Polyaluminium chloride	1327-41-9	4.24596e-05
198	eco: agri soil	Acrylamide	79-06-1	54.0914
199	eco: air indoor	Acrylamide	79-06-1	64.6441
200	eco: air unspec.	Acrylamide	79-06-1	29.5603
201	eco: fresh water	Acrylamide	79-06-1	1469.46
202	eco: stratosphere/troposphere	Acrylamide	79-06-1	34.5556
203	eco: non-agri soil	Acrylamide	79-06-1	54.4327
204	eco: non-urban/high stacks	Acrylamide	79-06-1	14.4291
205	eco: sea water	Acrylamide	79-06-1	0.000636329
206	eco: soil unspec.	Acrylamide	79-06-1	55.0492
207	eco: urban air	Acrylamide	79-06-1	16.3679
208	eco: water unspec.	Acrylamide	79-06-1	933.294
209	hh: agri soil	Acrylamide	79-06-1	9.18461e-06
210	hh: air indoor	Acrylamide	79-06-1	9.01003e-06
211	hh: air unspec.	Acrylamide	79-06-1	1.51504e-07
212	hh: fresh water	Acrylamide	79-06-1	4.81257e-08
213	hh: stratosphere/troposphere	Acrylamide	79-06-1	6.1216e-08
214	hh: non-agri soil	Acrylamide	79-06-1	3.61081e-10
215	hh: non-urban/high stacks	Acrylamide	79-06-1	5.95158e-08
216	hh: sea water	Acrylamide	79-06-1	2.6902e-09
217	hh: soil unspec.	Acrylamide	79-06-1	4.72316e-06
218	hh: urban air	Acrylamide	79-06-1	2.20758e-07
219	hh: water unspec.	Acrylamide	79-06-1	3.15025e-08
220	eco: agri soil	Octadecane -1ol ethoxylated	9005-00-9	1.36032
221	eco: air indoor	Octadecane -1ol ethoxylated	9005-00-9	3.95138
222	eco: air unspec.	Octadecane -1ol ethoxylated	9005-00-9	16.668
223	eco: fresh water	Octadecane -1ol ethoxylated	9005-00-9	2158.83
224	eco: stratosphere/troposphere	Octadecane -1ol ethoxylated	9005-00-9	10.4857
225	eco: non-agri soil	Octadecane -1ol ethoxylated	9005-00-9	5.09211
226	eco: non-urban/high stacks	Octadecane -1ol ethoxylated	9005-00-9	10.209
227	eco: sea water	Octadecane -1ol ethoxylated	9005-00-9	0.113034
228	eco: soil unspec.	Octadecane -1ol ethoxylated	9005-00-9	1.1548
229	eco: urban air	Octadecane -1ol ethoxylated	9005-00-9	18.9384
230	eco: water unspec.	Octadecane -1ol ethoxylated	9005-00-9	5635.89
231	hh: agri soil	Octadecane -1ol ethoxylated	9005-00-9	1.17424e-07
232	hh: air indoor	Octadecane -1ol ethoxylated	9005-00-9	1.02031e-05
233	hh: air unspec.	Octadecane -1ol ethoxylated	9005-00-9	1.77799e-07
234	hh: fresh water	Octadecane -1ol ethoxylated	9005-00-9	3.8655e-08
235	hh: stratosphere/troposphere	Octadecane -1ol ethoxylated	9005-00-9	1.40933e-07
236	hh: non-agri soil	Octadecane -1ol ethoxylated	9005-00-9	1.87173e-08
237	hh: non-urban/high stacks	Octadecane -1ol ethoxylated	9005-00-9	1.08406e-07
238	hh: sea water	Octadecane -1ol ethoxylated	9005-00-9	1.25762e-08
239	hh: soil unspec.	Octadecane -1ol ethoxylated	9005-00-9	7.46162e-08
240	hh: urban air	Octadecane -1ol ethoxylated	9005-00-9	4.16078e-07
241	hh: water unspec.	Octadecane -1ol ethoxylated	9005-00-9	2.77197e-08
242	eco: agri soil	Sodium hydroxide	1310-73-2	7711.48
243	eco: air indoor	Sodium hydroxide	1310-73-2	19789.9
244	eco: air unspec.	Sodium hydroxide	1310-73-2	14858.7
245	eco: fresh water	Sodium hydroxide	1310-73-2	668028
246	eco: stratosphere/troposphere	Sodium hydroxide	1310-73-2	13408.5
247	eco: non-agri soil	Sodium hydroxide	1310-73-2	7227.57
248	eco: non-urban/high stacks	Sodium hydroxide	1310-73-2	11511.9
249	eco: sea water	Sodium hydroxide	1310-73-2	48.9672
250	eco: soil unspec.	Sodium hydroxide	1310-73-2	7042.96
251	eco: urban air	Sodium hydroxide	1310-73-2	13432.9
252	eco: water unspec.	Sodium hydroxide	1310-73-2	520718
253	hh: agri soil	Sodium hydroxide	1310-73-2	1.27562e-06
254	hh: air indoor	Sodium hydroxide	1310-73-2	0.000160587
255	hh: air unspec.	Sodium hydroxide	1310-73-2	2.56963e-06
256	hh: fresh water	Sodium hydroxide	1310-73-2	4.39236e-06
257	hh: stratosphere/troposphere	Sodium hydroxide	1310-73-2	7.1118e-06
258	hh: non-agri soil	Sodium hydroxide	1310-73-2	4.72049e-07
259	hh: non-urban/high stacks	Sodium hydroxide	1310-73-2	5.78836e-06
260	hh: sea water	Sodium hydroxide	1310-73-2	9.60622e-08
261	hh: soil unspec.	Sodium hydroxide	1310-73-2	9.75508e-07
262	hh: urban air	Sodium hydroxide	1310-73-2	3.74397e-06
263	hh: water unspec.	Sodium hydroxide	1310-73-2	2.2378e-06

## Sheet: performance
	Dataset	Trial	Target	Algo	RMSE	R2	AUC	Cluster_0_R2	Cluster_1_R2	Cluster_2_R2	Cluster_3_R2	Cluster_4_R2	Cluster_5_R2	Cluster_6_R2	Cluster_7_R2	Cluster_8_R2	Cluster_9_R2	avg_uncertainty
0	Without_Outliers	0	cf_eco_agricultural_soil	DeepMPT_M (GROVER)	0.881382	0.172813		0.498242	-0.521763	0.209414	0.672101	-0.0641624	0.48974	0.436283	-0.0608439	0.325211	0.342001
0	Without_Outliers	0	cf_eco_agricultural_soil	DeepMPT_M	0.793262	0.246074		0.539955	0.299868	0.21783	0.333916	0.403325	0.387764	-0.143877	-0.217353	-0.481238	0.210525
0	Without_Outliers	0	cf_hh_total_agricultural_soil	DeepMPT_M (GROVER)	0.790149	0.372162	0.827222	0.0862554	0.266375	0.284956	0.294939	0.802317	0.259572	0.193668	0.621352	-0.28151	0.316797
0	Without_Outliers	0	cf_hh_total_agricultural_soil	DeepMPT_M	0.852095	0.282809	0.766691	0.587857	0.389227	0.326653	0.252341	0.443694	0.317153	-0.264596	0.36244	-60.4557	0.47531
1	Without_Outliers	0	cf_eco_air_indoor	DeepMPT_M (GROVER)	0.804897	0.356263		0.614952	-0.045548	0.363019	0.804207	0.00952595	0.789101	0.654575	0.0428718	0.566673	0.497972
1	Without_Outliers	0	cf_eco_air_indoor	DeepMPT_M	0.699413	0.44375		0.624995	0.360238	0.482219	0.543322	0.570499	0.569418	0.265403	-0.281626	0.130093	0.532628
1	Without_Outliers	0	cf_hh_total_air_indoor	DeepMPT_M	0.871182	0.271094	0.773512	0.336636	0.229657	-0.217657	0.354857	0.426648	0.28298	0.00690794	0.0792919	-6.81715	0.216704
1	Without_Outliers	0	cf_hh_total_air_indoor	DeepMPT_M (GROVER)	0.823376	0.39489	0.831263	0.138124	0.390937	0.381592	-1.32394	0.629896	-0.0693461	-18.8503	0.484962	0.44523	0.422166
2	Without_Outliers	0	cf_eco_air_unspecified	DeepMPT_M (GROVER)	0.785363	0.375397		0.627123	-0.0349103	0.376755	0.79622	0.0200981	0.781302	0.636714	0.120159	0.551701	0.506913
2	Without_Outliers	0	cf_eco_air_unspecified	DeepMPT_M	0.708672	0.432366		0.619564	0.318676	0.455679	0.53099	0.575516	0.579645	0.254517	-0.285157	0.131346	0.528395
2	Without_Outliers	0	cf_hh_total_air_unspecified	DeepMPT_M	0.914745	0.24663	0.768079	0.407436	0.202422	-0.65376	0.342565	0.395495	0.369439	0.0336629	-0.111385	-8.77463	0.212834
2	Without_Outliers	0	cf_hh_total_air_unspecified	DeepMPT_M (GROVER)	0.808322	0.416044	0.830814	0.202	0.331646	0.413653	-0.100495	0.646354	-0.865177	-2.6794	0.535877	0.336434	0.464537
3	Without_Outliers	0	cf_eco_fresh_water	DeepMPT_M (GROVER)	0.785941	0.366292		0.579821	-0.020033	0.139911	0.781127	0.0293489	0.569292	0.600799	0.290394	0.58507	0.548868
3	Without_Outliers	0	cf_eco_fresh_water	DeepMPT_M	0.751359	0.359973		0.617989	0.572204	0.28997	0.349788	0.556385	0.592957	0.125993	-0.162096	-3.7218	0.377364
3	Without_Outliers	0	cf_hh_total_fresh_water	DeepMPT_M (GROVER)	0.773082	0.437719	0.829692	0.192351	0.520171	0.289422	0.43684	0.527309	0.468527	-0.898512	0.684731	-0.0639566	0.423532
3	Without_Outliers	0	cf_hh_total_fresh_water	DeepMPT_M	0.837393	0.344096	0.769528	0.636813	0.525196	0.124301	0.419913	0.557913	0.335068	-0.307191	0.42236	-58.1894	0.374012
4	Without_Outliers	0	cf_eco_lower_stratosphere_and_upper_troposphere	DeepMPT_M (GROVER)	0.80164	0.358018		0.61291	-0.0782282	0.340758	0.781744	0.0787064	0.780717	0.62112	0.108181	0.54374	0.482626
4	Without_Outliers	0	cf_eco_lower_stratosphere_and_upper_troposphere	DeepMPT_M	0.7157	0.405049		0.585959	0.271377	0.436174	0.545117	0.564569	0.515537	0.194596	-0.274997	0.0978397	0.543014
4	Without_Outliers	0	cf_hh_total_lower_stratosphere_and_upper_troposphere	DeepMPT_M	0.844977	0.359577	0.771158	0.582615	0.321707	-0.538695	0.380497	0.468688	0.389477	0.128718	0.212565	-6.94425	0.378787
4	Without_Outliers	0	cf_hh_total_lower_stratosphere_and_upper_troposphere	DeepMPT_M (GROVER)	0.805312	0.418066	0.831413	0.294863	0.33801	0.423279	0.0669383	0.680336	-0.670755	-1.29724	0.516603	0.371402	0.399824
5	Without_Outliers	0	cf_eco_non-agricultural_soil	DeepMPT_M (GROVER)	0.876227	0.179546		0.490738	-0.538965	0.21554	0.689347	-0.0655305	0.50663	0.451503	-0.0693798	0.376296	0.342943
5	Without_Outliers	0	cf_eco_non-agricultural_soil	DeepMPT_M	0.785254	0.251819		0.521007	0.315364	0.222548	0.323901	0.405186	0.399902	-0.114476	-0.202669	-0.354403	0.234224
5	Without_Outliers	0	cf_hh_total_non-agricultural_soil	DeepMPT_M	0.852657	0.288288	0.766027	0.611681	0.29365	0.264933	0.312984	0.465772	0.296216	-0.316602	0.411037	-19.7469	0.489254
5	Without_Outliers	0	cf_hh_total_non-agricultural_soil	DeepMPT_M (GROVER)	0.769865	0.331845	0.82378	0.0276994	0.392385	0.0207878	-0.74921	0.617486	0.326005	0.607198	0.589842	-0.797051	0.353779
6	Without_Outliers	0	cf_eco_non-urban_air_or_from_high_stacks	DeepMPT_M (GROVER)	0.799722	0.360143		0.598649	-0.0682822	0.380017	0.782414	0.0895601	0.775393	0.586783	0.108517	0.527268	0.471947
6	Without_Outliers	0	cf_eco_non-urban_air_or_from_high_stacks	DeepMPT_M	0.714876	0.415014		0.590657	0.269473	0.444247	0.540609	0.568735	0.560429	0.20226	-0.255922	0.110245	0.549332
6	Without_Outliers	0	cf_hh_total_non-urban_air_or_from_high_stacks	DeepMPT_M	0.853033	0.351602	0.773271	0.578901	0.260806	-0.592099	0.395289	0.45838	0.365232	0.111136	0.158413	-6.48751	0.381117
6	Without_Outliers	0	cf_hh_total_non-urban_air_or_from_high_stacks	DeepMPT_M (GROVER)	0.811241	0.408873	0.82595	0.238051	0.370126	0.411647	0.00825685	0.655317	-1.05045	-1.58809	0.507257	0.371306	0.426516
7	Without_Outliers	0	cf_eco_sea_water	DeepMPT_M (GROVER)	0.683722	0.547422		0.738207	0.345975	0.483345	0.637204	0.749974	0.538496	0.20277	0.456228	0.673744	0.562101
7	Without_Outliers	0	cf_eco_sea_water	DeepMPT_M	0.680133	0.497725		0.614567	0.478237	0.437819	0.358536	0.487693	0.718209	0.530046	0.650096	-1.41339	0.555106
7	Without_Outliers	0	cf_hh_total_sea_water	DeepMPT_M (GROVER)	0.729945	0.483634	0.828345	0.431275	0.579263	0.238115	0.48747	0.445461	0.53815	-177.421	0.712018	0.170075	0.508019
7	Without_Outliers	0	cf_hh_total_sea_water	DeepMPT_M	0.929905	0.291317	0.773029	0.493656	0.48739	0.14329	0.32257	0.334407	0.218504	-0.454708	0.60438	-7.42332	0.194799
8	Without_Outliers	0	cf_eco_soil_unspecified	DeepMPT_M (GROVER)	0.874449	0.18229		0.491287	-0.493707	0.213979	0.671805	-0.0498496	0.510685	0.412705	-0.0445617	0.338082	0.342714
8	Without_Outliers	0	cf_eco_soil_unspecified	DeepMPT_M	0.781838	0.261438		0.544517	0.310239	0.227198	0.331831	0.40497	0.41782	-0.099164	-0.170916	-0.319645	0.231483
8	Without_Outliers	0	cf_hh_total_soil_unspecified	DeepMPT_M	0.840474	0.304754	0.771399	0.577556	0.425007	0.325613	0.262681	0.476321	0.335161	-0.211855	0.383049	-45.5029	0.478732
8	Without_Outliers	0	cf_hh_total_soil_unspecified	DeepMPT_M (GROVER)	0.788112	0.362901	0.834032	0.0935751	0.30328	0.229075	0.216873	0.792688	0.195294	0.401088	0.618349	-0.321175	0.330642
9	Without_Outliers	0	cf_eco_urban_air_close_to_ground	DeepMPT_M (GROVER)	0.787833	0.37054		0.598642	0.00253594	0.370924	0.778291	0.0349047	0.770936	0.512411	0.139977	0.505937	0.471564
9	Without_Outliers	0	cf_eco_urban_air_close_to_ground	DeepMPT_M	0.707128	0.437695		0.630976	0.32775	0.452311	0.529491	0.580681	0.580342	0.272089	-0.310956	0.0971639	0.524886
9	Without_Outliers	0	cf_hh_total_urban_air_close_to_ground	DeepMPT_M	0.918488	0.235568	0.767838	0.357793	0.13376	-0.340411	0.30905	0.392615	0.365613	0.0360577	0.0061785	-8.86363	0.154834
9	Without_Outliers	0	cf_hh_total_urban_air_close_to_ground	DeepMPT_M (GROVER)	0.80519	0.42132	0.832161	0.189241	0.370646	0.407433	-0.149911	0.646838	-0.664494	-3.82843	0.528205	0.371855	0.479983
10	Without_Outliers	0	cf_eco_water_unspecified	DeepMPT_M (GROVER)	0.784223	0.369034		0.579033	-0.0145897	0.154297	0.780245	0.0387365	0.572205	0.587113	0.293942	0.573706	0.545398
10	Without_Outliers	0	cf_eco_water_unspecified	DeepMPT_M	0.758131	0.348424		0.608006	0.566096	0.276738	0.340979	0.549759	0.596913	0.0971186	-0.199584	-4.06434	0.380095
10	Without_Outliers	0	cf_hh_total_water_unspecified	DeepMPT_M	0.836418	0.346007	0.771943	0.642292	0.498146	0.151659	0.403594	0.557592	0.340235	-0.292288	0.447398	-43.2859	0.346018
10	Without_Outliers	0	cf_hh_total_water_unspecified	DeepMPT_M (GROVER)	0.783536	0.42412	0.819964	0.219626	0.51437	0.275834	0.371365	0.51127	0.441675	-1.13259	0.669663	-0.0685505	0.378307
11	Without_Outliers	0	cf_eco_agricultural_soil	MPNN_GO_M	1.36456	0.436474		0.507571	0.206016	0.169769	0.398306	0.0755235	0.0900883	0.367245	-0.0349255		0.120569
11	Without_Outliers	0	cf_eco_agricultural_soil	RF (GROVER)	1.79277	0.366928		0.152862	0.331778	0.180621	0.184084	0.115407	0.0099758	-0.233114	0.193597	-0.120516	0.170931
11	Without_Outliers	0	cf_hh_total_agricultural_soil	RF (GROVER)	1.24785	0.3416	0.692504	0.281368	0.378062	0.313718	0.503521	0.314056	0.372896	0.119306	0.172141	0.32902	0.207408
11	Without_Outliers	0	cf_hh_total_agricultural_soil	MPNN_GO_M	1.1123	0.438484	0.715101	0.0496978	-0.010533	0.442379	0.490857	0.231431	0.313395	0.318029	0.283481	-1.04368	0.56097
12	Without_Outliers	0	cf_eco_agricultural_soil	XGB (GROVER)	1.76834	0.38407		0.16605	0.329794	0.241136	0.301716	0.133174	0.00194914	-0.412582	0.24174	0.153991	0.169971
12	Without_Outliers	0	cf_eco_air_indoor	MPNN_GO_M	1.28682	0.499452		0.426739	0.459285	0.352912	0.614741	0.299991	0.0626332	0.437359	0.283192		-0.00204663
12	Without_Outliers	0	cf_hh_total_agricultural_soil	XGB (GROVER)	1.20333	0.387742	0.718822	0.396784	0.43151	0.333501	0.629771	0.279274	0.321809	0.104294	0.221584	0.335986	0.26957
12	Without_Outliers	0	cf_hh_total_air_indoor	MPNN_GO_M	0.850224	0.438579	0.71554	0.291112	-0.273797	0.0214516	0.430727	0.22778	0.24561	0.30836	0.736075	0.383106	0.105976
13	Without_Outliers	0	cf_eco_agricultural_soil	GP (GROVER)	1.75321	0.394565		0.157406	0.348322	0.275348	0.451433	0.0506833	-0.0345741	-0.434492	0.21324	0.287196	0.107964	1.56071
13	Without_Outliers	0	cf_eco_air_unspecified	MPNN_GO_M	1.30451	0.485112		0.418332	0.454328	0.339853	0.618889	0.24081	0.0570694	0.398072	0.24223		-0.0291056
13	Without_Outliers	0	cf_hh_total_agricultural_soil	GP (GROVER)	1.18471	0.406541	0.718822	0.399729	0.40741	0.410227	0.806328	0.236847	0.331983	0.0589747	0.220386	0.161101	0.277997	1.30822
13	Without_Outliers	0	cf_hh_total_air_unspecified	MPNN_GO_M	0.823824	0.471744	0.715979	0.343017	-0.187839	0.353798	0.486567	0.394008	0.271845	0.289663	0.698211	-0.446569	0.0437929
14	Without_Outliers	0	cf_eco_agricultural_soil	DeepMPT_S (GROVER)	0.881382	0.172813		0.498242	-0.521763	0.209414	0.672101	-0.0641624	0.48974	0.436283	-0.0608439	0.325211	0.342001
14	Without_Outliers	0	cf_eco_fresh_water	MPNN_GO_M	1.15727	0.40877		0.447605	0.244742	0.279382	0.518252	0.314003	0.110466	0.35351	-0.0348081		-0.0959903
14	Without_Outliers	0	cf_hh_total_agricultural_soil	DeepMPT_S (GROVER)	0.790149	0.372162	0.827222	0.0862554	0.266375	0.284956	0.294939	0.802317	0.259572	0.193668	0.621352	-0.28151	0.316797
14	Without_Outliers	0	cf_hh_total_fresh_water	MPNN_GO_M	0.973223	0.462928	0.71532	0.276866	-0.601725	0.57531	0.219022	0.451728	0.30457	0.244511	0.490149	-0.0682792	0.700114
15	Without_Outliers	0	cf_eco_air_indoor	RF (GROVER)	1.51031	0.425112		0.350903	0.394037	0.234415	0.0908523	0.196064	0.185232	0.0799632	0.304333	0.330622	0.307388
15	Without_Outliers	0	cf_eco_lower_stratosphere_and_upper_troposphere	MPNN_GO_M	1.37487	0.487473		0.402109	0.479913	0.328438	0.609188	0.231402	0.0804927	0.43362	0.192745		0.00535756
15	Without_Outliers	0	cf_hh_total_air_indoor	RF (GROVER)	0.989816	0.316346	0.692504	0.270049	0.403679	0.136333	0.490237	0.357145	-0.226702	0.226816	0.0836058	0.275988	0.351605
15	Without_Outliers	0	cf_hh_total_lower_stratosphere_and_upper_troposphere	MPNN_GO_M	0.935058	0.480217	0.715101	0.30332	-0.326496	0.403542	0.504637	0.599572	0.144994	0.278218	0.664243	-0.572988	-0.0454263
16	Without_Outliers	0	cf_eco_air_indoor	XGB (GROVER)	1.48029	0.447741		0.386994	0.420372	0.252326	0.108093	0.151847	0.215411	0.228982	0.323071	0.456074	0.351424
16	Without_Outliers	0	cf_eco_non-agricultural_soil	MPNN_GO_M	1.36496	0.437127		0.511623	0.207906	0.110616	0.411863	0.0709295	0.087834	0.371095	-0.0156772		0.124941
16	Without_Outliers	0	cf_hh_total_air_indoor	XGB (GROVER)	0.954166	0.364706	0.718822	0.447116	0.462084	0.10861	0.590932	0.29751	-0.108968	0.325837	0.205081	0.256514	0.352257
16	Without_Outliers	0	cf_hh_total_non-agricultural_soil	MPNN_GO_M	1.24318	0.462693	0.716637	0.125486	-0.667488	0.317495	0.45822	0.284666	0.394448	0.279529	0.0958986	-1.71912	0.732546
17	Without_Outliers	0	cf_eco_air_indoor	GP (GROVER)	1.47468	0.451917		0.357003	0.396089	0.280154	0.218924	0.123394	0.228479	0.297059	0.318228	0.547723	0.404906	1.56936
17	Without_Outliers	0	cf_eco_non-urban_air_or_from_high_stacks	MPNN_GO_M	1.38057	0.482036		0.398638	0.478445	0.335914	0.605767	0.205656	0.0740183	0.397149	0.151422		0.0107438
17	Without_Outliers	0	cf_hh_total_air_indoor	GP (GROVER)	0.946525	0.37484	0.718822	0.40392	0.46109	0.175355	0.574212	0.308661	-0.321831	0.335546	0.118347	0.439267	0.418839	0.937355
17	Without_Outliers	0	cf_hh_total_non-urban_air_or_from_high_stacks	MPNN_GO_M	0.939004	0.480014	0.714662	0.231893	-0.265812	0.417145	0.514113	0.589635	0.148455	0.278668	0.657193	-0.43383	-0.0493343
18	Without_Outliers	0	cf_eco_air_indoor	DeepMPT_S (GROVER)	0.804897	0.356263		0.614952	-0.045548	0.363019	0.804207	0.00952595	0.789101	0.654575	0.0428718	0.566673	0.497972
18	Without_Outliers	0	cf_eco_sea_water	MPNN_GO_M	2.4986	0.59103		0.50012	0.649369	0.608038	0.66099	0.261332	0.451586	0.315611	-0.153401		0.392075
18	Without_Outliers	0	cf_hh_total_air_indoor	DeepMPT_S (GROVER)	0.823376	0.39489	0.831263	0.138124	0.390937	0.381592	-1.32394	0.629896	-0.0693461	-18.8503	0.484962	0.44523	0.422166
18	Without_Outliers	0	cf_hh_total_sea_water	MPNN_GO_M	1.2931	0.494356	0.714223	0.0238156	0.35875	0.707793	0.49424	0.405358	0.310224	0.210342	0.592471	-0.122108	0.725457
19	Without_Outliers	0	cf_eco_air_unspecified	RF (GROVER)	1.58151	0.398232		0.263599	0.234459	0.271714	0.065215	0.0493905	0.223473	0.187059	0.380161	0.316229	0.355283
19	Without_Outliers	0	cf_eco_soil_unspecified	MPNN_GO_M	1.36133	0.439941		0.510246	0.209102	0.160715	0.412175	0.0718457	0.0959654	0.356523	-0.0442732		0.144722
19	Without_Outliers	0	cf_hh_total_air_unspecified	RF (GROVER)	0.991957	0.359064	0.692504	0.376535	0.389213	0.230876	0.364897	0.314374	-0.068231	0.00255	0.133245	0.257103	0.374501
19	Without_Outliers	0	cf_hh_total_soil_unspecified	MPNN_GO_M	1.1162	0.436786	0.71532	0.0554528	-0.081869	0.448551	0.487125	0.235012	0.324666	0.295943	0.257208	-0.846859	0.558952
20	Without_Outliers	0	cf_eco_air_unspecified	XGB (GROVER)	1.53225	0.435137		0.394584	0.278231	0.278428	0.0483655	0.0749353	0.160857	0.181177	0.420262	0.417272	0.472713
20	Without_Outliers	0	cf_eco_urban_air_close_to_ground	MPNN_GO_M	1.29352	0.488961		0.449425	0.42335	0.322075	0.614191	0.272441	0.0543903	0.400142	0.279533		-0.0384541
20	Without_Outliers	0	cf_hh_total_air_unspecified	XGB (GROVER)	0.943025	0.420738	0.718822	0.519172	0.486892	0.274511	0.490392	0.313873	-0.114545	-0.175943	0.176731	0.362792	0.422317
20	Without_Outliers	0	cf_hh_total_urban_air_close_to_ground	MPNN_GO_M	0.820582	0.460202	0.71554	0.323217	-0.270538	0.234868	0.48359	0.333538	0.267297	0.30141	0.706922	-0.27631	0.03388
21	Without_Outliers	0	cf_eco_air_unspecified	GP (GROVER)	1.50606	0.454277		0.349728	0.300501	0.311521	0.230668	0.118503	0.152803	-0.0183529	0.449786	0.491994	0.446596	1.55014
21	Without_Outliers	0	cf_eco_water_unspecified	MPNN_GO_M	1.1583	0.407712		0.449009	0.232181	0.253978	0.520024	0.320741	0.11381	0.354905	-0.0388851		-0.110553
21	Without_Outliers	0	cf_hh_total_air_unspecified	GP (GROVER)	0.932416	0.433698	0.718822	0.500433	0.429849	0.334865	0.481958	0.321106	-0.184535	0.0931072	0.171079	0.43311	0.464329	0.957009
21	Without_Outliers	0	cf_hh_total_water_unspecified	MPNN_GO_M	0.974576	0.460675	0.714662	0.255538	-0.460686	0.59034	0.224681	0.441748	0.300446	0.230701	0.502877	-0.255738	0.698924
22	Without_Outliers	0	cf_eco_agricultural_soil	MPNN_GE_M	1.40633	0.401446		0.3306	0.201292	0.273308	0.46834	0.0876221	0.0943642	0.215485	0.031489		0.145866
22	Without_Outliers	0	cf_eco_air_unspecified	DeepMPT_S (GROVER)	0.785363	0.375397		0.627123	-0.0349103	0.376755	0.79622	0.0200981	0.781302	0.636714	0.120159	0.551701	0.506913
22	Without_Outliers	0	cf_hh_total_agricultural_soil	MPNN_GE_M	1.14578	0.404177	0.766023	-0.0844824	-1.06125	0.227309	0.496198	0.145473	0.0474853	0.601919	0.570743	-1.22361	0.664737
22	Without_Outliers	0	cf_hh_total_air_unspecified	DeepMPT_S (GROVER)	0.808322	0.416044	0.830814	0.202	0.331646	0.413653	-0.100495	0.646354	-0.865177	-2.6794	0.535877	0.336434	0.464537
23	Without_Outliers	0	cf_eco_air_indoor	MPNN_GE_M	1.32144	0.472155		0.317835	0.47168	0.403015	0.585544	0.363983	0.0245841	0.283023	0.274867		-0.0327267
23	Without_Outliers	0	cf_eco_fresh_water	RF (GROVER)	1.50401	0.332562		0.0994178	0.186513	0.341705	0.0439174	0.216879	0.141352	0.139514	0.295115	0.36363	0.334027
23	Without_Outliers	0	cf_hh_total_air_indoor	MPNN_GE_M	0.838858	0.453489	0.765145	0.254275	-0.12813	0.354846	0.512644	0.250761	0.0833521	0.445995	0.731127	-0.109042	-0.443699
23	Without_Outliers	0	cf_hh_total_fresh_water	RF (GROVER)	1.13378	0.398124	0.692504	0.28849	0.534476	0.358388	0.506747	0.357158	-0.293643	-0.107402	0.277886	0.495014	0.266546
24	Without_Outliers	0	cf_eco_air_unspecified	MPNN_GE_M	1.3283	0.466165		0.319437	0.477078	0.391888	0.595933	0.334377	0.0244217	0.266124	0.225858		-0.0495735
24	Without_Outliers	0	cf_eco_fresh_water	XGB (GROVER)	1.4728	0.359977		0.0307264	0.185139	0.402072	0.0482705	0.35476	0.165417	0.00409951	0.383626	0.533642	0.367262
24	Without_Outliers	0	cf_hh_total_air_unspecified	MPNN_GE_M	0.829902	0.463921	0.780509	0.199734	-0.475845	0.275224	0.56388	0.331926	0.0217857	0.516275	0.73764	-0.593356	-0.588723
24	Without_Outliers	0	cf_hh_total_fresh_water	XGB (GROVER)	1.10124	0.43217	0.718822	0.431803	0.568294	0.366252	0.548961	0.308963	-0.257665	-0.10401	0.299433	0.454628	0.258107
25	Without_Outliers	0	cf_eco_fresh_water	MPNN_GE_M	1.1451	0.421133		0.467348	0.321964	0.484253	0.547221	0.335105	0.0241672	0.162953	0.23051		0.0185246
25	Without_Outliers	0	cf_eco_fresh_water	GP (GROVER)	1.41725	0.407351		0.186485	0.26972	0.396125	0.14826	0.335818	0.140763	-0.0712135	0.386415	0.636334	0.368956	1.40427
25	Without_Outliers	0	cf_hh_total_fresh_water	GP (GROVER)	1.07634	0.457562	0.718822	0.476973	0.595667	0.427897	0.75785	0.278967	-0.23993	-0.097321	0.261348	0.209097	0.289444	1.14393
25	Without_Outliers	0	cf_hh_total_fresh_water	MPNN_GE_M	0.979837	0.455604	0.777875	0.128159	-1.62906	0.390114	0.315094	0.505114	-0.00890909	0.675077	0.649772	-0.38254	0.659342
26	Without_Outliers	0	cf_eco_fresh_water	DeepMPT_S (GROVER)	0.785941	0.366292		0.579821	-0.020033	0.139911	0.781127	0.0293489	0.569292	0.600799	0.290394	0.58507	0.548868
26	Without_Outliers	0	cf_eco_lower_stratosphere_and_upper_troposphere	MPNN_GE_M	1.40857	0.462043		0.252915	0.488687	0.379139	0.594501	0.30751	0.107764	0.282109	0.21326		-0.0445736
26	Without_Outliers	0	cf_hh_total_fresh_water	DeepMPT_S (GROVER)	0.773082	0.437719	0.829692	0.192351	0.520171	0.289422	0.43684	0.527309	0.468527	-0.898512	0.684731	-0.0639566	0.423532
26	Without_Outliers	0	cf_hh_total_lower_stratosphere_and_upper_troposphere	MPNN_GE_M	0.95008	0.463383	0.773266	0.106132	-0.190978	0.0960614	0.575595	0.523446	-0.132238	0.575149	0.679306	-1.71748	-0.563241
27	Without_Outliers	0	cf_eco_lower_stratosphere_and_upper_troposphere	RF (GROVER)	1.68027	0.381608		0.268269	0.244425	0.323997	0.0766752	0.220607	0.143516	0.0443475	0.264369	0.230482	0.225779
27	Without_Outliers	0	cf_eco_non-agricultural_soil	MPNN_GE_M	1.41295	0.396846		0.320846	0.195418	0.277364	0.465933	0.0965122	0.0473288	0.211392	0.0345195		0.18672
27	Without_Outliers	0	cf_hh_total_lower_stratosphere_and_upper_troposphere	RF (GROVER)	1.09903	0.397913	0.692504	0.393626	0.359071	0.285092	0.292558	0.303184	0.0707591	0.0949752	0.253979	0.294464	0.446941
27	Without_Outliers	0	cf_hh_total_non-agricultural_soil	MPNN_GE_M	1.30924	0.404078	0.767998	0.0650657	-1.84824	0.104206	0.496772	0.131616	0.0939612	0.53512	0.364573	-2.02237	0.762975
28	Without_Outliers	0	cf_eco_lower_stratosphere_and_upper_troposphere	XGB (GROVER)	1.61934	0.425648		0.304658	0.295913	0.397876	0.102163	0.240464	0.212118	0.298571	0.3241	0.337311	0.246189
28	Without_Outliers	0	cf_eco_non-urban_air_or_from_high_stacks	MPNN_GE_M	1.41722	0.454172		0.245155	0.46969	0.38899	0.598551	0.291884	0.0656165	0.271451	0.152415		-0.0397858
28	Without_Outliers	0	cf_hh_total_lower_stratosphere_and_upper_troposphere	XGB (GROVER)	1.02089	0.480488	0.718822	0.548259	0.427862	0.393747	0.365923	0.368	0.269724	-0.10598	0.318153	0.367536	0.514109
28	Without_Outliers	0	cf_hh_total_non-urban_air_or_from_high_stacks	MPNN_GE_M	0.959528	0.457035	0.773266	-0.00456197	-0.21394	0.0863289	0.574379	0.526612	-0.140961	0.581315	0.686226	-1.53788	-0.621235
29	Without_Outliers	0	cf_eco_lower_stratosphere_and_upper_troposphere	GP (GROVER)	1.58032	0.45299		0.281734	0.344922	0.402649	0.20529	0.185641	0.234334	0.146013	0.382097	0.360574	0.30392	1.59087
29	Without_Outliers	0	cf_eco_sea_water	MPNN_GE_M	2.50769	0.588049		0.469056	0.57405	0.604097	0.615479	0.441342	0.375821	0.305052	-0.110457		0.464995
29	Without_Outliers	0	cf_hh_total_lower_stratosphere_and_upper_troposphere	GP (GROVER)	1.01982	0.481573	0.718822	0.536817	0.371868	0.433395	0.363611	0.316423	0.0915813	-0.00153758	0.327226	0.404835	0.537531	1.04142
29	Without_Outliers	0	cf_hh_total_sea_water	MPNN_GE_M	1.219	0.550645	0.761853	0.406985	-0.455149	0.766173	0.587099	0.485376	0.167303	0.554841	0.625599	-3.48001	0.793184
30	Without_Outliers	0	cf_eco_lower_stratosphere_and_upper_troposphere	DeepMPT_S (GROVER)	0.80164	0.358018		0.61291	-0.0782282	0.340758	0.781744	0.0787064	0.780717	0.62112	0.108181	0.54374	0.482626
30	Without_Outliers	0	cf_eco_soil_unspecified	MPNN_GE_M	1.40818	0.400729		0.340211	0.188008	0.28548	0.470499	0.0815769	0.0515664	0.208777	0.00810379		0.186111
30	Without_Outliers	0	cf_hh_total_lower_stratosphere_and_upper_troposphere	DeepMPT_S (GROVER)	0.805312	0.418066	0.831413	0.294863	0.33801	0.423279	0.0669383	0.680336	-0.670755	-1.29724	0.516603	0.371402	0.399824
30	Without_Outliers	0	cf_hh_total_soil_unspecified	MPNN_GE_M	1.15354	0.398476	0.79741	-0.0825474	-1.04226	0.225178	0.498377	0.140268	0.0516104	0.580138	0.545429	-1.7699	0.669579
31	Without_Outliers	0	cf_eco_non-agricultural_soil	RF (GROVER)	1.73666	0.360256		0.0729867	0.318402	0.244642	0.0106351	0.0708909	-0.0884507	0.00351092	0.223717	0.187892	0.178886
31	Without_Outliers	0	cf_eco_urban_air_close_to_ground	MPNN_GE_M	1.31519	0.471693		0.349244	0.462791	0.405692	0.589018	0.350824	0.0133631	0.265643	0.249645		-0.026702
31	Without_Outliers	0	cf_hh_total_non-agricultural_soil	RF (GROVER)	1.40646	0.355353	0.692504	0.296061	0.377217	0.267931	0.412543	0.342554	0.161422	0.111957	0.237761	0.290806	0.251242
31	Without_Outliers	0	cf_hh_total_urban_air_close_to_ground	MPNN_GE_M	0.814285	0.468454	0.786216	0.242185	-0.458431	0.295729	0.566685	0.308858	0.0717337	0.499716	0.74467	-0.696766	-0.562692
32	Without_Outliers	0	cf_eco_non-agricultural_soil	XGB (GROVER)	1.67078	0.407877		0.118758	0.349783	0.33557	0.0384748	0.17855	0.0203973	-0.117653	0.301768	0.338619	0.209451
32	Without_Outliers	0	cf_eco_water_unspecified	MPNN_GE_M	1.14967	0.416509		0.457428	0.31191	0.484583	0.544142	0.328339	0.0116745	0.15802	0.22006		0.0340485
32	Without_Outliers	0	cf_hh_total_non-agricultural_soil	XGB (GROVER)	1.34846	0.407428	0.718822	0.445851	0.427928	0.29085	0.531839	0.304891	0.40185	0.156352	0.278816	0.352092	0.263937
32	Without_Outliers	0	cf_hh_total_water_unspecified	MPNN_GE_M	0.981589	0.452886	0.778973	0.0815107	-1.33437	0.39551	0.348569	0.494798	-0.0418603	0.676395	0.646085	-0.570631	0.642873
33	Without_Outliers	0	cf_eco_agricultural_soil	RF	1.40674	0.441403		0.542223	0.0274436	0.171165	0.284277	0.113303	0.287383	0.177617	0.152805	0.311806	0.131715
33	Without_Outliers	0	cf_eco_non-agricultural_soil	GP (GROVER)	1.62923	0.436956		0.219242	0.399302	0.373663	0.0744132	0.143255	0.0794805	-0.439189	0.271064	0.432755	0.218158	1.60747
33	Without_Outliers	0	cf_hh_total_agricultural_soil	RF	1.23651	0.395516	0.745881	0.247129	0.258774	0.34906	0.468854	0.213815	0.245473	0.296623	0.223338	-0.329812	0.304659
33	Without_Outliers	0	cf_hh_total_non-agricultural_soil	GP (GROVER)	1.34476	0.410677	0.718822	0.43109	0.371063	0.336572	0.753698	0.176083	0.559538	0.0687132	0.307486	0.0715549	0.295466	1.49794
34	Without_Outliers	0	cf_eco_agricultural_soil	XGB	1.37557	0.465884		0.58073	0.00220565	0.189572	0.326786	0.142399	0.328451	0.231885	0.219866	0.289232	0.108901
34	Without_Outliers	0	cf_eco_non-agricultural_soil	DeepMPT_S (GROVER)	0.876227	0.179546		0.490738	-0.538965	0.21554	0.689347	-0.0655305	0.50663	0.451503	-0.0693798	0.376296	0.342943
34	Without_Outliers	0	cf_hh_total_agricultural_soil	XGB	1.16985	0.458938	0.707292	0.279496	0.459678	0.330808	0.555308	0.252249	0.283071	0.384663	0.0760957	-0.140991	0.414568
34	Without_Outliers	0	cf_hh_total_non-agricultural_soil	DeepMPT_S (GROVER)	0.769865	0.331845	0.82378	0.0276994	0.392385	0.0207878	-0.74921	0.617486	0.326005	0.607198	0.589842	-0.797051	0.353779
35	Without_Outliers	0	cf_eco_agricultural_soil	GP	1.38804	0.456159		0.543468	-0.0492344	0.170002	0.251951	0.129427	0.364092	0.145631	0.0879758	0.565554	0.195581	1.42428
35	Without_Outliers	0	cf_eco_non-urban_air_or_from_high_stacks	RF (GROVER)	1.61326	0.396996		0.156956	0.296825	0.266537	0.0788701	0.280528	0.00273613	0.186951	0.313622	0.273737	0.372668
35	Without_Outliers	0	cf_hh_total_agricultural_soil	GP	1.25538	0.376927	0.707292	0.324782	0.284057	0.378604	0.455954	0.227835	0.119271	0.416856	-0.0777473	-2.29895	0.314009	1.20387
35	Without_Outliers	0	cf_hh_total_non-urban_air_or_from_high_stacks	RF (GROVER)	1.09271	0.404816	0.692504	0.399895	0.361886	0.28425	0.285152	0.330324	0.119678	0.159999	0.252757	0.3274	0.459385
36	Without_Outliers	0	cf_eco_agricultural_soil	DeepMPT_S	0.817935	0.310006		0.127156	0.407519	-0.659163	0.534647	-0.0438863	0.298345	0.294016	0.183302	0.574146	0.237743
36	Without_Outliers	0	cf_eco_non-urban_air_or_from_high_stacks	XGB (GROVER)	1.56203	0.434685		0.19248	0.330901	0.350665	0.0958831	0.158832	0.152167	0.311365	0.373149	0.312477	0.414556
36	Without_Outliers	0	cf_hh_total_agricultural_soil	DeepMPT_S	0.888449	0.220307	0.737173	0.573475	0.435818	0.256724	0.081135	0.314416	0.351088	-0.540161	0.310701	-20.8449	0.393883
36	Without_Outliers	0	cf_hh_total_non-urban_air_or_from_high_stacks	XGB (GROVER)	1.02606	0.475206	0.718822	0.537518	0.44059	0.383735	0.369167	0.362148	0.0401599	0.0680091	0.312842	0.385346	0.50743
37	Without_Outliers	0	cf_eco_agricultural_soil	MPNN_GO_S	1.58106	0.516914		0.487576	-0.132135	0.30906	0.192374	0.262155	0.188309	-0.0205135	0.578441	-2.59518	0.12371
37	Without_Outliers	0	cf_eco_non-urban_air_or_from_high_stacks	GP (GROVER)	1.51314	0.469521		0.27256	0.405977	0.351923	0.132226	0.27643	0.109485	0.206895	0.366205	0.393979	0.415681	1.63648
37	Without_Outliers	0	cf_hh_total_agricultural_soil	MPNN_GO_S	1.17435	0.374094	0.710711	0.0105912	-0.201572	0.670071	0.520216	0.175853	0.106336	0.416133	0.34923	-1.40682	0.0419268
37	Without_Outliers	0	cf_hh_total_non-urban_air_or_from_high_stacks	GP (GROVER)	1.01926	0.482144	0.718822	0.537424	0.377771	0.432779	0.362649	0.315611	0.0893715	-0.00132741	0.327262	0.406082	0.537773	1.04302
38	Without_Outliers	0	cf_eco_agricultural_soil	MPNN_GE_S	1.58711	0.513213		0.509453	-0.101267	0.132009	0.399846	0.202802	-0.0540266	-0.0222583	0.477218	-3.99086	0.0891537
38	Without_Outliers	0	cf_eco_non-urban_air_or_from_high_stacks	DeepMPT_S (GROVER)	0.799722	0.360143		0.598649	-0.0682822	0.380017	0.782414	0.0895601	0.775393	0.586783	0.108517	0.527268	0.471947
38	Without_Outliers	0	cf_hh_total_agricultural_soil	MPNN_GE_S	1.12821	0.422311	0.76273	-0.137468	-0.865139	0.485201	0.472312	0.190059	0.152009	0.436181	0.601301	-0.985065	0.757496
38	Without_Outliers	0	cf_hh_total_non-urban_air_or_from_high_stacks	DeepMPT_S (GROVER)	0.811241	0.408873	0.82595	0.238051	0.370126	0.411647	0.00825685	0.655317	-1.05045	-1.58809	0.507257	0.371306	0.426516
39	Without_Outliers	0	cf_eco_air_indoor	RF	1.41994	0.482476		0.243227	0.410693	0.23699	0.62472	0.502094	0.212405	0.381536	0.0727085	0.374403	0.275551
39	Without_Outliers	0	cf_eco_sea_water	RF (GROVER)	3.16199	0.459329		0.229737	0.167943	0.429297	0.518971	0.505269	0.131849	0.109255	0.485824	0.59865	0.451303
39	Without_Outliers	0	cf_hh_total_air_indoor	RF	0.972224	0.380468	0.745881	0.476927	0.255119	0.30056	0.423011	0.177986	0.243983	0.368548	0.466662	-0.787375	0.210763
39	Without_Outliers	0	cf_hh_total_sea_water	RF (GROVER)	1.52579	0.430107	0.692504	0.388907	0.336777	0.420461	0.610491	0.371247	0.496619	0.207778	0.259011	0.482998	0.356181
40	Without_Outliers	0	cf_eco_air_indoor	XGB	1.41144	0.488655		0.141646	0.405121	0.276328	0.656216	0.52464	0.294891	0.456829	0.26651	0.458295	0.33622
40	Without_Outliers	0	cf_eco_sea_water	XGB (GROVER)	2.97544	0.521246		0.308954	0.179603	0.512047	0.604007	0.541377	0.205657	0.161437	0.567973	0.66759	0.548396
40	Without_Outliers	0	cf_hh_total_air_indoor	XGB	0.943688	0.416302	0.707292	0.43969	0.182308	0.262051	0.46455	0.201824	0.283212	0.4621	0.614131	-0.627823	0.229195
40	Without_Outliers	0	cf_hh_total_sea_water	XGB (GROVER)	1.48401	0.460891	0.718822	0.495752	0.327669	0.49672	0.655036	0.365245	0.356856	0.10732	0.232029	0.58737	0.43722
41	Without_Outliers	0	cf_eco_air_indoor	GP	1.43232	0.473414		0.207279	0.272551	0.355239	0.522963	0.518578	0.199929	0.400755	0.343512	0.211623	0.364688	1.34803
41	Without_Outliers	0	cf_eco_sea_water	GP (GROVER)	2.88695	0.549298		0.295601	0.180669	0.550145	0.683326	0.533787	0.182327	0.163117	0.616822	0.67137	0.622062	2.83414
41	Without_Outliers	0	cf_hh_total_air_indoor	GP	0.980852	0.369422	0.707292	0.466838	0.318266	0.394709	0.429342	0.188456	0.206463	0.383868	0.469389	-2.37738	0.277944	0.976542
41	Without_Outliers	0	cf_hh_total_sea_water	GP (GROVER)	1.44531	0.488645	0.718822	0.512467	0.383744	0.511995	0.667411	0.370837	0.310144	0.273476	0.303524	0.501092	0.424089	1.68696
42	Without_Outliers	0	cf_eco_air_indoor	DeepMPT_S	0.660843	0.50341		0.682077	0.471625	0.488923	0.558962	0.464999	0.52108	0.337663	0.249718	0.389986	0.672756
42	Without_Outliers	0	cf_eco_sea_water	DeepMPT_S (GROVER)	0.683722	0.547422		0.738207	0.345975	0.483345	0.637204	0.749974	0.538496	0.20277	0.456228	0.673744	0.562101
42	Without_Outliers	0	cf_hh_total_air_indoor	DeepMPT_S	0.801499	0.383036	0.713147	0.476885	0.333128	-0.171023	0.366281	0.518586	0.339434	0.155476	0.107937	-3.44108	0.485607
42	Without_Outliers	0	cf_hh_total_sea_water	DeepMPT_S (GROVER)	0.729945	0.483634	0.828345	0.431275	0.579263	0.238115	0.48747	0.445461	0.53815	-177.421	0.712018	0.170075	0.508019
43	Without_Outliers	0	cf_eco_air_indoor	MPNN_GO_S	1.35897	0.441752		0.246379	0.385498	0.507071	0.60217	0.201485	0.114068	0.314063	0.0841991		-0.165713
43	Without_Outliers	0	cf_eco_soil_unspecified	RF (GROVER)	1.7196	0.371274		0.0568438	0.329665	0.287305	0.0023413	0.0598776	-0.0499907	-0.0744376	0.225959	0.183741	0.157287
43	Without_Outliers	0	cf_hh_total_air_indoor	MPNN_GO_S	0.907273	0.360711	0.710272	0.0262615	-2.83655	0.279736	0.368499	0.189048	0.159295	0.284921	0.659294	-0.59111	-0.333163
43	Without_Outliers	0	cf_hh_total_soil_unspecified	RF (GROVER)	1.25784	0.326563	0.692504	0.260065	0.318903	0.283085	0.482787	0.331186	0.328821	0.170984	0.166305	0.24892	0.257927
44	Without_Outliers	0	cf_eco_air_indoor	MPNN_GE_S	1.31772	0.475129		0.434768	0.475254	0.382157	0.623592	0.338445	0.144353	0.276429	0.340682		-0.385915
44	Without_Outliers	0	cf_eco_soil_unspecified	XGB (GROVER)	1.67374	0.404361		0.0996372	0.325584	0.371029	0.0228466	0.109367	0.00637226	-0.806952	0.335594	0.350992	0.25397
44	Without_Outliers	0	cf_hh_total_air_indoor	MPNN_GE_S	0.881975	0.395865	0.76273	0.1907	-0.964486	0.223304	0.532429	0.325444	0.0263762	0.254005	0.606443	0.535984	-0.709886
44	Without_Outliers	0	cf_hh_total_soil_unspecified	XGB (GROVER)	1.20376	0.38322	0.718822	0.389003	0.413523	0.325716	0.630443	0.311484	0.36258	0.182785	0.204707	0.322425	0.269772
45	Without_Outliers	0	cf_eco_air_unspecified	RF	1.40703	0.503288		0.351934	0.455874	0.262489	0.638979	0.404632	0.209041	0.36441	0.370245	0.0803071	0.277122
45	Without_Outliers	0	cf_eco_soil_unspecified	GP (GROVER)	1.62664	0.43741		0.203027	0.398976	0.374679	0.062694	0.147752	0.0864989	-0.452657	0.270566	0.427368	0.215556	1.60912
45	Without_Outliers	0	cf_hh_total_air_unspecified	RF	1.00353	0.400727	0.745881	0.367951	0.291111	0.443378	0.45233	0.252822	0.213418	0.383352	0.393604	-0.113366	0.27964
45	Without_Outliers	0	cf_hh_total_soil_unspecified	GP (GROVER)	1.18868	0.398581	0.718822	0.396438	0.388179	0.388882	0.803656	0.232536	0.359294	0.0670894	0.228985	0.144291	0.280969	1.31419
46	Without_Outliers	0	cf_eco_air_unspecified	XGB	1.37581	0.525084		0.303179	0.538071	0.285607	0.747756	0.424246	0.238925	0.402943	0.483574	0.239806	0.289118
46	Without_Outliers	0	cf_eco_soil_unspecified	DeepMPT_S (GROVER)	0.874449	0.18229		0.491287	-0.493707	0.213979	0.671805	-0.0498496	0.510685	0.412705	-0.0445617	0.338082	0.342714
46	Without_Outliers	0	cf_hh_total_air_unspecified	XGB	0.959172	0.452539	0.707292	0.380664	0.397352	0.324784	0.554606	0.25411	0.235528	0.473661	0.52557	-0.0721695	0.270283
46	Without_Outliers	0	cf_hh_total_soil_unspecified	DeepMPT_S (GROVER)	0.788112	0.362901	0.834032	0.0935751	0.30328	0.229075	0.216873	0.792688	0.195294	0.401088	0.618349	-0.321175	0.330642
47	Without_Outliers	0	cf_eco_air_unspecified	GP	1.42251	0.492301		0.262384	0.549503	0.228932	0.638191	0.413204	0.193013	0.320451	0.519522	-0.044711	0.351404	1.3374
47	Without_Outliers	0	cf_eco_urban_air_close_to_ground	RF (GROVER)	1.58837	0.382561		0.176183	0.278551	0.272307	0.0597483	0.291583	0.0306919	0.103106	0.305164	0.335888	0.340222
47	Without_Outliers	0	cf_hh_total_air_unspecified	GP	1.00489	0.399103	0.707292	0.320657	0.384851	0.513044	0.491073	0.274792	0.160739	0.423576	0.328101	-1.56247	0.335685	0.97219
47	Without_Outliers	0	cf_hh_total_urban_air_close_to_ground	RF (GROVER)	0.986612	0.343606	0.692504	0.340593	0.382104	0.207381	0.338108	0.349681	-0.272936	0.127511	0.114311	0.256479	0.383827
48	Without_Outliers	0	cf_eco_air_unspecified	DeepMPT_S	0.696137	0.516264		0.120064	0.548704	0.557702	0.298847	0.532394	0.690899	0.552868	0.444961	-0.669105	0.678994
48	Without_Outliers	0	cf_eco_urban_air_close_to_ground	XGB (GROVER)	1.52792	0.428667		0.171908	0.343619	0.380345	0.054923	0.256706	0.110571	0.0748952	0.398404	0.335257	0.327801
48	Without_Outliers	0	cf_hh_total_air_unspecified	DeepMPT_S	0.861345	0.332021	0.795243	0.531168	0.419972	-0.800361	0.433314	0.527959	0.158413	-0.215236	-0.101066	-4.72216	0.511467
48	Without_Outliers	0	cf_hh_total_urban_air_close_to_ground	XGB (GROVER)	0.94474	0.39814	0.718822	0.480143	0.502871	0.232737	0.502974	0.329751	0.129427	-0.177921	0.187829	0.30824	0.352751
49	Without_Outliers	0	cf_eco_air_unspecified	MPNN_GO_S	1.51728	0.455651		0.437526	0.281432	0.687217	0.553431	0.429284	-0.0117224	0.414975	0.233011	0.333979	0.220537
49	Without_Outliers	0	cf_eco_urban_air_close_to_ground	GP (GROVER)	1.4901	0.456598		0.249288	0.376993	0.36874	0.152327	0.357935	0.132809	0.220265	0.382922	0.49299	0.382181	1.55993
49	Without_Outliers	0	cf_hh_total_air_unspecified	MPNN_GO_S	0.851256	0.435979	0.707419	0.285563	-1.02812	0.534501	0.547694	0.277433	0.0972812	0.357781	0.662044	-1.29221	-0.359228
49	Without_Outliers	0	cf_hh_total_urban_air_close_to_ground	GP (GROVER)	0.928005	0.419274	0.718822	0.481636	0.444477	0.301594	0.495637	0.327562	-0.237655	0.128508	0.155283	0.429197	0.451774	0.948869
50	Without_Outliers	0	cf_eco_air_unspecified	MPNN_GE_S	1.40216	0.535122		0.719223	0.344835	0.673571	0.568431	0.369638	0.195718	0.344506	0.156119	0.376821	0.244587
50	Without_Outliers	0	cf_eco_urban_air_close_to_ground	DeepMPT_S (GROVER)	0.787833	0.37054		0.598642	0.00253594	0.370924	0.778291	0.0349047	0.770936	0.512411	0.139977	0.505937	0.471564
50	Without_Outliers	0	cf_hh_total_air_unspecified	MPNN_GE_S	0.901767	0.367059	0.76273	0.157402	-0.855763	0.372494	0.541416	0.170697	0.0847976	0.14436	0.69457	-1.09052	-0.978954
50	Without_Outliers	0	cf_hh_total_urban_air_close_to_ground	DeepMPT_S (GROVER)	0.80519	0.42132	0.832161	0.189241	0.370646	0.407433	-0.149911	0.646838	-0.664494	-3.82843	0.528205	0.371855	0.479983
51	Without_Outliers	0	cf_eco_fresh_water	RF	1.30125	0.429843		0.303386	0.377883	0.291368	0.556074	0.334575	0.319376	0.315014	0.399014	0.70391	0.343569
51	Without_Outliers	0	cf_eco_water_unspecified	RF (GROVER)	1.69276	0.250098		0.131124	0.110159	0.283758	0.208471	0.366241	0.0677076	0.0208644	0.223413	0.345195	0.23994
51	Without_Outliers	0	cf_hh_total_fresh_water	RF	1.11417	0.476132	0.745881	0.509005	0.247878	0.315132	0.439792	0.437848	0.342435	0.381164	0.443804	-0.577077	0.431705
51	Without_Outliers	0	cf_hh_total_water_unspecified	RF (GROVER)	1.132	0.400687	0.692504	0.311524	0.535339	0.344463	0.471803	0.353454	-0.143878	-0.0918159	0.2922	0.462096	0.270213
52	Without_Outliers	0	cf_eco_fresh_water	XGB	1.31238	0.420049		0.201602	0.356254	0.311349	0.670022	0.42533	0.39043	0.328404	0.547674	0.708068	0.319451
52	Without_Outliers	0	cf_eco_water_unspecified	XGB (GROVER)	1.6518	0.285956		0.0293284	0.144538	0.337705	0.362625	0.466693	0.0818448	0.0824349	0.310895	0.541532	0.277058
52	Without_Outliers	0	cf_hh_total_fresh_water	XGB	1.04477	0.539354	0.707292	0.601704	0.480368	0.299078	0.561716	0.573151	0.306386	0.419834	0.540184	-2.0714	0.440672
52	Without_Outliers	0	cf_hh_total_water_unspecified	XGB (GROVER)	1.09122	0.443097	0.718822	0.45382	0.554977	0.370763	0.700085	0.32256	-0.107979	-0.12503	0.317324	0.350723	0.250074
53	Without_Outliers	0	cf_eco_fresh_water	GP	1.69499	0.0326047		-0.114333	0.105538	-4.50616e-06	-0.0427859	-0.0240659	-0.213995	-0.280531	-0.0794377	-0.0476092	-0.194429	1.60949
53	Without_Outliers	0	cf_eco_water_unspecified	GP (GROVER)	1.64933	0.28809		0.0454093	0.144826	0.333962	0.487042	0.406786	0.00402878	0.206008	0.307968	0.569916	0.303451	1.32608
53	Without_Outliers	0	cf_hh_total_fresh_water	GP	1.12172	0.469005	0.707292	0.573254	0.306723	0.424504	0.40948	0.432001	0.214252	0.429482	0.410999	-3.6671	0.544748	1.05383
53	Without_Outliers	0	cf_hh_total_water_unspecified	GP (GROVER)	1.07752	0.456989	0.718822	0.477971	0.594982	0.424176	0.751304	0.282042	-0.227442	-0.0702469	0.259273	0.211184	0.290308	1.14632
54	Without_Outliers	0	cf_eco_fresh_water	DeepMPT_S	0.746678	0.418952		-0.0244942	0.424028	0.271035	0.363049	0.517175	0.570524	0.349577	0.302514	-1.18216	0.730773
54	Without_Outliers	0	cf_eco_water_unspecified	DeepMPT_S (GROVER)	0.784223	0.369034		0.579033	-0.0145897	0.154297	0.780245	0.0387365	0.572205	0.587113	0.293942	0.573706	0.545398
54	Without_Outliers	0	cf_hh_total_fresh_water	DeepMPT_S	0.824241	0.364536	0.76319	0.632049	0.672639	0.25626	0.451824	0.644102	0.47124	-1.02279	0.497931	-21.1461	0.414037
54	Without_Outliers	0	cf_hh_total_water_unspecified	DeepMPT_S (GROVER)	0.783536	0.42412	0.819964	0.219626	0.51437	0.275834	0.371365	0.51127	0.441675	-1.13259	0.669663	-0.0685505	0.378307
55	Without_Outliers	1	cf_eco_agricultural_soil	DeepMPT_M (GROVER)	0.809966	0.337609		0.523171	0.359517	0.178043	-1.31743	-0.0553299	-0.700712	0.5526	0.489488	0.35512	0.233027
55	Without_Outliers	0	cf_eco_fresh_water	MPNN_GO_S	1.18979	0.44186		0.51011	0.327992	0.584858	0.595558	0.277229	0.342198	0.401996	0.164672	0.57928	0.0141197
55	Without_Outliers	1	cf_hh_total_agricultural_soil	DeepMPT_M (GROVER)	0.798034	0.326988	0.652037	0.737808	-0.201121	0.297694	0.385426	0.717245	0.503496	-3.30805	0.330594	-0.362744	0.32121
55	Without_Outliers	0	cf_hh_total_fresh_water	MPNN_GO_S	0.948907	0.489431	0.712687	0.336333	-0.728298	0.645401	0.384915	0.408527	0.266771	0.421572	0.553628	0.0364408	0.345249
56	Without_Outliers	1	cf_eco_air_indoor	DeepMPT_M (GROVER)	0.7622	0.439222		0.510615	0.477912	0.346343	0.425713	0.340548	0.00435835	0.624911	0.519225	0.455007	0.173122
56	Without_Outliers	0	cf_eco_fresh_water	MPNN_GE_S	1.13276	0.494083		0.670816	0.358736	0.638807	0.690919	0.103463	0.32595	0.213829	0.650463	0.50133	0.180671
56	Without_Outliers	1	cf_hh_total_air_indoor	DeepMPT_M (GROVER)	0.839469	0.373473	0.650164	0.572132	0.143744	0.277582	0.664675	0.577745	0.55307	-27617.8	0.321291	0.554588	0.362107
56	Without_Outliers	0	cf_hh_total_fresh_water	MPNN_GE_S	0.967605	0.469111	0.76273	0.2332	-1.27789	0.656308	0.485866	0.5277	-0.0405951	0.565074	0.583192	-2.45121	0.54731
57	Without_Outliers	1	cf_eco_air_unspecified	DeepMPT_M (GROVER)	0.77395	0.42544		0.515217	0.471593	0.291566	0.181706	0.325201	-0.0230876	0.609222	0.508509	0.446321	0.194376
57	Without_Outliers	0	cf_eco_lower_stratosphere_and_upper_troposphere	RF	1.5154	0.473306		0.362511	0.256543	0.278245	0.575203	0.399803	0.190531	0.412447	0.233837	0.193337	0.198064
57	Without_Outliers	1	cf_hh_total_air_unspecified	DeepMPT_M (GROVER)	0.81802	0.382297	0.647706	0.60001	0.0667194	0.161293	0.733537	0.668197	0.600107	-7.31747	0.316687	0.575491	0.434837
57	Without_Outliers	0	cf_hh_total_lower_stratosphere_and_upper_troposphere	RF	1.12015	0.414906	0.745881	0.302459	0.324437	0.327455	0.488251	0.335112	0.230314	0.387343	0.309812	-0.246819	0.257449
58	Without_Outliers	1	cf_eco_fresh_water	DeepMPT_M (GROVER)	0.814972	0.372918		0.28074	0.423662	0.146372	0.0652485	0.0785148	-0.117636	0.251738	0.510126	0.220964	0.38474
58	Without_Outliers	0	cf_eco_lower_stratosphere_and_upper_troposphere	XGB	1.50643	0.479517		0.247002	0.195302	0.309418	0.670485	0.399119	0.239274	0.511078	0.334199	0.416196	0.234119
58	Without_Outliers	1	cf_hh_total_fresh_water	DeepMPT_M (GROVER)	0.732844	0.392851	0.667837	0.702817	0.139497	0.102378	0.699662	0.57592	0.655044	-3.12684	0.353483	0.49391	0.48123
58	Without_Outliers	0	cf_hh_total_lower_stratosphere_and_upper_troposphere	XGB	1.06667	0.46944	0.707292	0.327679	0.432442	0.416509	0.562827	0.37947	0.203455	0.494186	0.441637	-0.0162092	0.20802
59	Without_Outliers	0	cf_eco_lower_stratosphere_and_upper_troposphere	GP	1.56592	0.437599		0.190455	0.153405	0.262486	0.546083	0.438619	0.205616	0.439848	0.338458	0.166832	0.198945	1.39686
59	Without_Outliers	1	cf_eco_lower_stratosphere_and_upper_troposphere	DeepMPT_M (GROVER)	0.767544	0.423573		0.542495	0.513015	0.335887	0.410968	0.317046	-0.065524	0.582147	0.511128	0.346548	0.0626724
59	Without_Outliers	1	cf_hh_total_lower_stratosphere_and_upper_troposphere	DeepMPT_M (GROVER)	0.795299	0.393264	0.634012	0.554562	0.0900336	0.190291	0.852527	0.690991	0.60618	-1.50902	0.358043	0.649462	0.524877
59	Without_Outliers	0	cf_hh_total_lower_stratosphere_and_upper_troposphere	GP	1.10163	0.434094	0.707292	0.276936	0.431499	0.524693	0.543783	0.435014	0.0928034	0.470418	0.320452	-1.29596	0.314176	1.04536
60	Without_Outliers	0	cf_eco_lower_stratosphere_and_upper_troposphere	DeepMPT_S	0.729921	0.442043		0.354502	0.560052	0.524275	0.515721	0.430189	0.430045	0.539641	-0.213719	-1.21596	0.171901
60	Without_Outliers	1	cf_eco_non-agricultural_soil	DeepMPT_M (GROVER)	0.800536	0.35054		0.537208	0.364125	0.208154	-1.07668	-0.0110286	-0.654442	0.5355	0.489689	0.403709	0.212119
60	Without_Outliers	0	cf_hh_total_lower_stratosphere_and_upper_troposphere	DeepMPT_S	0.795314	0.432646	0.746952	0.697409	0.52555	0.0397213	0.428233	0.519546	0.151094	0.138992	0.267803	-2.26356	0.431003
60	Without_Outliers	1	cf_hh_total_non-agricultural_soil	DeepMPT_M (GROVER)	0.782763	0.325297	0.650515	0.703923	-0.0385439	0.162047	0.217099	0.770096	0.287855	-10.8858	0.337852	-0.108809	0.483923
61	Without_Outliers	0	cf_eco_lower_stratosphere_and_upper_troposphere	MPNN_GO_S	1.48617	0.456241		0.303249	0.446579	0.433408	0.553255	0.354649	0.0274083	0.227073	0.159965	-0.40263	0.24224
61	Without_Outliers	1	cf_eco_non-urban_air_or_from_high_stacks	DeepMPT_M (GROVER)	0.77918	0.411624		0.523156	0.513349	0.278754	0.0450097	0.310576	-0.107573	0.621228	0.488828	0.388952	0.1405
61	Without_Outliers	0	cf_hh_total_lower_stratosphere_and_upper_troposphere	MPNN_GO_S	0.932567	0.482984	0.70698	0.325119	-0.587456	0.507612	0.587328	0.507452	0.00665344	0.448187	0.678338	0.349692	-0.717081
61	Without_Outliers	1	cf_hh_total_non-urban_air_or_from_high_stacks	DeepMPT_M (GROVER)	0.796245	0.391222	0.655314	0.557015	0.0905539	0.173708	0.850677	0.683854	0.600595	-1.3755	0.363369	0.639448	0.520265
62	Without_Outliers	0	cf_eco_lower_stratosphere_and_upper_troposphere	MPNN_GE_S	1.38457	0.528047		0.413912	0.680025	0.367568	0.662186	0.260837	0.168426	0.187546	0.149377	-2.82073	0.460765
62	Without_Outliers	1	cf_eco_sea_water	DeepMPT_M (GROVER)	0.723847	0.484036		0.241873	0.551918	0.514189	0.588833	0.218716	0.659428	-2.61146	0.601323	0.495987	0.427198
62	Without_Outliers	0	cf_hh_total_lower_stratosphere_and_upper_troposphere	MPNN_GE_S	0.957512	0.454955	0.76273	0.165206	-0.353618	0.343641	0.569967	0.433441	-0.0284337	0.469698	0.666292	-0.88263	-0.667298
62	Without_Outliers	1	cf_hh_total_sea_water	DeepMPT_M (GROVER)	0.671611	0.390262	0.645716	0.572369	0.30764	0.0748724	0.807193	0.651266	0.649957	-5.48021	0.474014	0.456854	0.430702
63	Without_Outliers	0	cf_eco_non-agricultural_soil	RF	1.36474	0.473849		0.507853	0.341295	0.0424879	0.316046	0.187969	0.309354	0.263518	0.30826	-0.363924	0.394007
63	Without_Outliers	1	cf_eco_soil_unspecified	DeepMPT_M (GROVER)	0.808195	0.337331		0.519852	0.357468	0.188271	-1.23974	-0.0687857	-0.67907	0.517319	0.480674	0.357318	0.229656
63	Without_Outliers	0	cf_hh_total_non-agricultural_soil	RF	1.36829	0.44945	0.745881	0.384626	0.294281	0.300589	0.435164	0.0977491	0.301603	0.313493	0.209312	-0.116871	0.377674
63	Without_Outliers	1	cf_hh_total_soil_unspecified	DeepMPT_M (GROVER)	0.806937	0.310864	0.649696	0.732661	-0.190858	0.251127	0.264351	0.72678	0.42997	-3.64418	0.283978	-0.351573	0.367714
64	Without_Outliers	0	cf_eco_non-agricultural_soil	XGB	1.32499	0.504052		0.479705	0.286296	0.133479	0.383901	0.243074	0.41795	0.339714	0.414912	-0.451234	0.459306
64	Without_Outliers	1	cf_eco_urban_air_close_to_ground	DeepMPT_M (GROVER)	0.781878	0.416333		0.492103	0.460744	0.270844	0.21787	0.311953	-0.0174174	0.630728	0.507554	0.464876	0.173679
64	Without_Outliers	0	cf_hh_total_non-agricultural_soil	XGB	1.32414	0.484408	0.707292	0.384568	0.428341	0.363597	0.524255	0.030077	0.41657	0.35808	0.133694	-0.0953754	0.339188
64	Without_Outliers	1	cf_hh_total_urban_air_close_to_ground	DeepMPT_M (GROVER)	0.835429	0.36015	0.643375	0.591801	0.04894	0.148861	0.728068	0.652475	0.605563	-20.4207	0.293729	0.577812	0.381699
65	Without_Outliers	0	cf_eco_non-agricultural_soil	GP	1.35821	0.478867		0.462274	0.279745	0.219091	0.312966	0.159834	0.367755	0.238722	0.398299	-0.272519	0.444702	1.43614
65	Without_Outliers	1	cf_eco_water_unspecified	DeepMPT_M (GROVER)	0.810459	0.38001		0.379586	0.336422	0.168981	0.41052	0.0796847	-0.0304044	0.403939	0.524857	0.386101	0.325814
65	Without_Outliers	0	cf_hh_total_non-agricultural_soil	GP	1.38644	0.434742	0.707292	0.456795	0.260508	0.34571	0.414247	0.0984894	0.196511	0.403059	0.0495904	-1.50747	0.35802	1.34965
65	Without_Outliers	1	cf_hh_total_water_unspecified	DeepMPT_M (GROVER)	0.7411	0.378883	0.646536	0.70301	0.130592	0.0594181	0.696944	0.58179	0.653025	-3.58991	0.357714	0.482064	0.445571
66	Without_Outliers	1	cf_eco_agricultural_soil	RF (GROVER)	1.63193	0.282393		0.159463	0.168318	0.290872	0.122437	0.0782622	0.142412	-0.0899251	0.159206	0.105663	0.102025
66	Without_Outliers	0	cf_eco_non-agricultural_soil	DeepMPT_S	0.743603	0.450739		0.475681	0.481191	0.408097	0.539858	0.538782	0.494013	-0.00269222	0.681584	0.115639	0.470546
66	Without_Outliers	1	cf_hh_total_agricultural_soil	RF (GROVER)	1.32183	0.333573	0.677658	0.271842	0.294748	0.370548	0.0882631	0.360816	-0.00365771	0.501827	0.137891	0.0526457	0.296174
66	Without_Outliers	0	cf_hh_total_non-agricultural_soil	DeepMPT_S	0.827572	0.329548	0.73675	0.655421	0.489955	0.305601	0.23626	0.37379	0.268759	-0.224215	0.597963	-4.10138	0.39119
67	Without_Outliers	1	cf_eco_agricultural_soil	XGB (GROVER)	1.61622	0.296143		0.135666	0.131862	0.399705	0.241785	0.0126028	0.223467	-0.335713	0.177371	-0.0638858	0.183212
67	Without_Outliers	0	cf_eco_non-agricultural_soil	MPNN_GO_S	1.55147	0.228659		0.3752	-0.0457627	0.356811	0.167498	0.141964	0.118264	0.051008	0.137145		-0.0676953
67	Without_Outliers	1	cf_hh_total_agricultural_soil	XGB (GROVER)	1.28755	0.367695	0.679944	0.221504	0.390446	0.465376	0.157552	0.372972	-0.0155515	0.235081	0.0961981	0.00202623	0.388211
67	Without_Outliers	0	cf_hh_total_non-agricultural_soil	MPNN_GO_S	1.323	0.39148	0.707419	-0.123004	-0.533677	0.513061	0.533802	0.147406	0.343226	0.405949	0.271475	-0.905607	0.0600032
68	Without_Outliers	1	cf_eco_agricultural_soil	GP (GROVER)	1.55922	0.344913		0.164678	0.249758	0.407362	0.316752	0.028056	0.219605	-0.209739	0.214275	-0.00370063	0.244425	1.62465
68	Without_Outliers	0	cf_eco_non-agricultural_soil	MPNN_GE_S	1.54096	0.239069		0.211055	0.0413192	0.300542	0.327799	-0.0506487	0.229028	0.24776	-0.389442		0.0769941
68	Without_Outliers	1	cf_hh_total_agricultural_soil	GP (GROVER)	1.29477	0.360582	0.679944	0.227086	0.369724	0.450121	0.06276	0.420383	-0.0269341	0.447352	0.0780889	0.264457	0.338783	1.27413
68	Without_Outliers	0	cf_hh_total_non-agricultural_soil	MPNN_GE_S	1.31882	0.395322	0.76273	-0.136832	-0.933171	0.216717	0.479254	0.182196	0.141758	0.499141	0.263379	-2.85457	0.702165
69	Without_Outliers	1	cf_eco_agricultural_soil	DeepMPT_S (GROVER)	0.809966	0.337609		0.523171	0.359517	0.178043	-1.31743	-0.0553299	-0.700712	0.5526	0.489488	0.35512	0.233027
69	Without_Outliers	0	cf_eco_non-urban_air_or_from_high_stacks	RF	1.45053	0.533588		0.514358	0.433705	0.20498	0.637258	0.372135	0.205819	0.305825	0.233956	0.203078	0.282366
69	Without_Outliers	1	cf_hh_total_agricultural_soil	DeepMPT_S (GROVER)	0.798034	0.326988	0.652037	0.737808	-0.201121	0.297694	0.385426	0.717245	0.503496	-3.30805	0.330594	-0.362744	0.32121
69	Without_Outliers	0	cf_hh_total_non-urban_air_or_from_high_stacks	RF	1.12328	0.413951	0.745881	0.282801	0.324437	0.327455	0.488251	0.335112	0.230314	0.387343	0.309812	-0.246819	0.257449
70	Without_Outliers	1	cf_eco_air_indoor	RF (GROVER)	1.59342	0.350872		0.232041	0.14375	0.241659	0.103181	0.0901354	0.163878	0.10877	0.348718	0.339738	0.432903
70	Without_Outliers	0	cf_eco_non-urban_air_or_from_high_stacks	XGB	1.42971	0.546884		0.455089	0.427124	0.209035	0.711253	0.37082	0.275325	0.358582	0.364631	0.296348	0.290467
70	Without_Outliers	1	cf_hh_total_air_indoor	RF (GROVER)	0.959057	0.3214	0.677658	0.167739	0.485783	0.271626	0.148146	0.479921	-0.0258539	-0.700875	0.148037	0.122085	0.375334
70	Without_Outliers	0	cf_hh_total_non-urban_air_or_from_high_stacks	XGB	1.07014	0.468088	0.707292	0.304054	0.432442	0.416509	0.562827	0.37947	0.203455	0.494186	0.441637	-0.0162092	0.20802
71	Without_Outliers	1	cf_eco_air_indoor	XGB (GROVER)	1.53104	0.400704		0.233782	0.167406	0.349488	0.378453	0.124247	0.13966	0.0665375	0.418295	0.409309	0.51231
71	Without_Outliers	0	cf_eco_non-urban_air_or_from_high_stacks	GP	1.47724	0.516254		0.433554	0.346473	0.275107	0.593341	0.453349	0.191748	0.255334	0.302838	0.168129	0.308563	1.41713
71	Without_Outliers	1	cf_hh_total_air_indoor	XGB (GROVER)	0.939426	0.348896	0.679944	0.327997	0.608977	0.284151	0.0480674	0.486371	-0.0487109	-0.633752	0.0707674	-0.0810659	0.43282
71	Without_Outliers	0	cf_hh_total_non-urban_air_or_from_high_stacks	GP	1.10442	0.433466	0.707292	0.264668	0.431499	0.524693	0.543783	0.435014	0.0928034	0.470418	0.320452	-1.29596	0.314176	1.04536
72	Without_Outliers	1	cf_eco_air_indoor	GP (GROVER)	1.51977	0.409495		0.241067	0.140395	0.35208	0.386163	0.0839385	0.221072	0.0689452	0.487861	0.426462	0.53943	1.54356
72	Without_Outliers	0	cf_eco_non-urban_air_or_from_high_stacks	DeepMPT_S	0.690491	0.525972		0.233774	0.210491	0.714402	0.463481	0.594275	0.618693	0.492918	0.337101	0.852031	0.581222
72	Without_Outliers	1	cf_hh_total_air_indoor	GP (GROVER)	0.959164	0.321249	0.679944	0.285709	0.558471	0.262939	-0.100886	0.520067	-0.0778612	-0.522034	0.0105598	0.152887	0.367006	0.928786
72	Without_Outliers	0	cf_hh_total_non-urban_air_or_from_high_stacks	DeepMPT_S	0.821771	0.398257	0.706628	0.746838	0.232097	0.30612	0.33682	0.383845	0.348529	0.186501	0.31805	-2.11819	0.381436
73	Without_Outliers	1	cf_eco_air_indoor	DeepMPT_S (GROVER)	0.7622	0.439222		0.510615	0.477912	0.346343	0.425713	0.340548	0.00435835	0.624911	0.519225	0.455007	0.173122
73	Without_Outliers	0	cf_eco_non-urban_air_or_from_high_stacks	MPNN_GO_S	1.44134	0.450134		0.257419	0.0659676	0.517129	0.548245	0.252806	0.240053	0.478132	0.135326	0.93082	-0.104839
73	Without_Outliers	1	cf_hh_total_air_indoor	DeepMPT_S (GROVER)	0.839469	0.373473	0.650164	0.572132	0.143744	0.277582	0.664675	0.577745	0.55307	-27617.8	0.321291	0.554588	0.362107
73	Without_Outliers	0	cf_hh_total_non-urban_air_or_from_high_stacks	MPNN_GO_S	0.945566	0.472721	0.732002	0.158335	-0.658416	0.500122	0.609112	0.498839	0.0142004	0.512651	0.565035	-0.764028	-0.726713
74	Without_Outliers	1	cf_eco_air_unspecified	RF (GROVER)	1.50763	0.371077		0.22344	0.401963	0.238874	-0.186261	0.203179	0.142973	0.0860277	0.322592	-0.0763412	0.200455
74	Without_Outliers	0	cf_eco_non-urban_air_or_from_high_stacks	MPNN_GE_S	1.50504	0.40046		-0.181801	-0.0266678	0.601373	0.633204	0.260938	0.271175	0.379117	0.0312194	0.276419	0.0938047
74	Without_Outliers	1	cf_hh_total_air_unspecified	RF (GROVER)	0.992422	0.351677	0.677658	0.241924	0.462422	0.346217	0.100955	0.397738	0.0428128	-0.394944	0.153596	0.123772	0.433087
74	Without_Outliers	0	cf_hh_total_non-urban_air_or_from_high_stacks	MPNN_GE_S	0.982097	0.431192	0.76273	0.188707	-0.36075	0.144422	0.537717	0.52002	-0.0768965	0.411768	0.561081	-2.22325	-0.419979
75	Without_Outliers	1	cf_eco_air_unspecified	XGB (GROVER)	1.43009	0.434109		0.227063	0.483107	0.344914	0.00227216	0.0978866	0.0767593	0.0515946	0.441815	0.159154	0.202621
75	Without_Outliers	0	cf_eco_sea_water	RF	2.55048	0.581371		0.473029	0.443879	0.524071	0.505179	0.51976	0.431357	0.597006	0.236742	0.274435	0.456339
75	Without_Outliers	1	cf_hh_total_air_unspecified	XGB (GROVER)	0.975796	0.373217	0.679944	0.364291	0.549372	0.378219	-0.0328653	0.40353	-0.0406046	-0.940649	0.127509	0.101176	0.465213
75	Without_Outliers	0	cf_hh_total_sea_water	RF	1.50176	0.512547	0.745881	0.413243	0.214604	0.518987	0.556176	0.603238	0.360181	0.412434	0.641804	-0.344945	0.315049
76	Without_Outliers	1	cf_eco_air_unspecified	GP (GROVER)	1.44523	0.422064		0.23063	0.436751	0.295065	0.0724961	0.0850241	0.17171	-0.0272326	0.412387	0.299833	0.257705	1.57809
76	Without_Outliers	0	cf_eco_sea_water	XGB	2.38292	0.63457		0.459225	0.569757	0.548915	0.582817	0.550078	0.533171	0.673616	0.362292	0.485591	0.522111
76	Without_Outliers	1	cf_hh_total_air_unspecified	GP (GROVER)	0.986271	0.359688	0.679944	0.349999	0.505745	0.372541	-0.109201	0.443136	-0.000935104	-0.514712	0.0285274	0.216084	0.459852	0.936998
76	Without_Outliers	0	cf_hh_total_sea_water	XGB	1.43855	0.552717	0.707292	0.386212	0.410714	0.661876	0.591421	0.633593	0.393481	0.456285	0.64791	-0.399639	0.48475
77	Without_Outliers	1	cf_eco_air_unspecified	DeepMPT_S (GROVER)	0.77395	0.42544		0.515217	0.471593	0.291566	0.181706	0.325201	-0.0230876	0.609222	0.508509	0.446321	0.194376
77	Without_Outliers	0	cf_eco_sea_water	GP	2.48762	0.601751		0.425149	0.597773	0.445668	0.518642	0.570132	0.504435	0.597501	0.391454	0.320317	0.488607	2.40583
77	Without_Outliers	1	cf_hh_total_air_unspecified	DeepMPT_S (GROVER)	0.81802	0.382297	0.647706	0.60001	0.0667194	0.161293	0.733537	0.668197	0.600107	-7.31747	0.316687	0.575491	0.434837
77	Without_Outliers	0	cf_hh_total_sea_water	GP	1.46368	0.536958	0.707292	0.479528	0.220791	0.540794	0.514428	0.570755	0.339729	0.370674	0.642685	-0.950133	0.655529	1.36007
78	Without_Outliers	1	cf_eco_fresh_water	RF (GROVER)	1.35798	0.31075		0.13609	0.274691	0.258054	-0.0209779	0.269491	0.102374	0.174996	0.322845	-0.0345823	0.184936
78	Without_Outliers	0	cf_eco_sea_water	DeepMPT_S	0.667702	0.55157		0.586897	0.561663	0.46262	0.619153	0.527723	0.558609	0.575176	0.638489	-7.10132	0.615428
78	Without_Outliers	1	cf_hh_total_fresh_water	RF (GROVER)	1.14125	0.388827	0.677658	0.254926	0.434758	0.353077	0.296345	0.34286	0.0800963	0.405553	0.255535	0.127193	0.435494
78	Without_Outliers	0	cf_hh_total_sea_water	DeepMPT_S	0.837627	0.42499	0.699988	0.61538	0.663269	0.634828	0.547895	0.369946	0.504146	-0.50967	0.657604	-6.88267	0.417912
79	Without_Outliers	1	cf_eco_fresh_water	XGB (GROVER)	1.29166	0.376432		0.153181	0.270075	0.347297	0.259179	0.303344	0.0692252	0.015768	0.459086	0.30674	0.187369
79	Without_Outliers	0	cf_eco_sea_water	MPNN_GO_S	2.63396	0.547014		0.379673	0.512649	0.70255	0.353849	0.533451	0.500736	0.472414	-0.316653	0.462945	0.452628
79	Without_Outliers	1	cf_hh_total_fresh_water	XGB (GROVER)	1.09343	0.438966	0.679944	0.333174	0.466302	0.431932	0.36818	0.389744	0.148066	0.527689	0.247145	0.264453	0.496571
79	Without_Outliers	0	cf_hh_total_sea_water	MPNN_GO_S	1.37378	0.429291	0.708516	-0.0232688	0.0379629	0.802239	0.536789	0.555381	0.0324852	0.431473	0.554003	-0.262956	-0.393592
80	Without_Outliers	1	cf_eco_fresh_water	GP (GROVER)	1.2855	0.382362		0.180479	0.293723	0.334806	0.264627	0.234249	0.170013	0.159548	0.437536	0.33023	0.182837	1.45476
80	Without_Outliers	0	cf_eco_sea_water	MPNN_GE_S	2.58329	0.564276		0.47573	0.647124	0.730222	0.553403	0.384655	0.336809	0.607032	0.338182	0.00364578	0.474138
80	Without_Outliers	1	cf_hh_total_fresh_water	GP (GROVER)	1.11456	0.417069	0.679944	0.363853	0.396457	0.439647	0.281602	0.380886	0.0989317	0.360642	0.18609	0.407571	0.401325	1.13506
80	Without_Outliers	0	cf_hh_total_sea_water	MPNN_GE_S	1.2349	0.538852	0.76273	0.212589	0.124765	0.84892	0.626055	0.439873	0.237842	0.409102	0.722596	-6.63746	0.643939
81	Without_Outliers	1	cf_eco_fresh_water	DeepMPT_S (GROVER)	0.814972	0.372918		0.28074	0.423662	0.146372	0.0652485	0.0785148	-0.117636	0.251738	0.510126	0.220964	0.38474
81	Without_Outliers	0	cf_eco_soil_unspecified	RF	1.36182	0.475087		0.501631	0.387355	0.0322008	0.308889	0.186907	0.308788	0.239011	0.307163	-0.48024	0.413529
81	Without_Outliers	1	cf_hh_total_fresh_water	DeepMPT_S (GROVER)	0.732844	0.392851	0.667837	0.702817	0.139497	0.102378	0.699662	0.57592	0.655044	-3.12684	0.353483	0.49391	0.48123
81	Without_Outliers	0	cf_hh_total_soil_unspecified	RF	1.24067	0.395483	0.745881	0.271827	0.291015	0.338482	0.47504	0.197301	0.232952	0.309216	0.14358	-0.246447	0.294302
82	Without_Outliers	1	cf_eco_lower_stratosphere_and_upper_troposphere	RF (GROVER)	1.54381	0.372432		0.218754	0.331396	0.312463	0.0340688	0.054198	0.049452	-0.0295202	0.245335	0.137209	0.348578
82	Without_Outliers	0	cf_eco_soil_unspecified	XGB	1.32792	0.500894		0.492052	0.242	0.119427	0.373859	0.249273	0.421962	0.280947	0.385747	-0.266415	0.451549
82	Without_Outliers	1	cf_hh_total_lower_stratosphere_and_upper_troposphere	RF (GROVER)	1.10598	0.389974	0.677658	0.3109	0.461591	0.320157	0.0755852	0.335959	0.0669344	0.304439	0.21309	0.0566306	0.479473
82	Without_Outliers	0	cf_hh_total_soil_unspecified	XGB	1.19069	0.44321	0.707292	0.307832	0.421587	0.415604	0.540543	0.230814	0.254297	0.371767	0.0768663	-0.288716	0.366733
83	Without_Outliers	1	cf_eco_lower_stratosphere_and_upper_troposphere	XGB (GROVER)	1.47779	0.424961		0.233823	0.356375	0.375308	0.255177	0.145278	-0.108477	-0.691221	0.370418	0.19105	0.449296
83	Without_Outliers	0	cf_eco_soil_unspecified	GP	1.35586	0.479667		0.459386	0.28124	0.222751	0.309508	0.156173	0.372736	0.240374	0.394316	-0.27647	0.448566	1.43439
83	Without_Outliers	1	cf_hh_total_lower_stratosphere_and_upper_troposphere	XGB (GROVER)	1.07395	0.424797	0.679944	0.361052	0.497243	0.379692	0.134445	0.375869	0.156436	-0.733237	0.187791	0.128914	0.522433
83	Without_Outliers	0	cf_hh_total_soil_unspecified	GP	1.26121	0.375304	0.707292	0.33783	0.278664	0.383382	0.450531	0.213901	0.123007	0.415702	-0.0445604	-2.11054	0.302982	1.20966
84	Without_Outliers	1	cf_eco_lower_stratosphere_and_upper_troposphere	GP (GROVER)	1.47817	0.424665		0.268997	0.313721	0.400827	0.270539	0.120688	0.0491788	-0.361472	0.361628	0.337121	0.422146	1.63294
84	Without_Outliers	0	cf_eco_soil_unspecified	DeepMPT_S	0.738142	0.458029		0.428914	0.430191	0.44885	0.513412	0.454636	0.484482	0.174259	0.611145	0.529504	0.55442
84	Without_Outliers	1	cf_hh_total_lower_stratosphere_and_upper_troposphere	GP (GROVER)	1.07011	0.428906	0.679944	0.401145	0.48708	0.391874	-0.00553994	0.401217	0.08595	0.114974	0.156309	0.230514	0.561014	1.01951
84	Without_Outliers	0	cf_hh_total_soil_unspecified	DeepMPT_S	0.868306	0.257946	0.751056	0.63383	0.486491	0.385489	0.128197	0.301666	0.357238	-0.449804	0.488185	-28.8789	0.490546
85	Without_Outliers	1	cf_eco_lower_stratosphere_and_upper_troposphere	DeepMPT_S (GROVER)	0.767544	0.423573		0.542495	0.513015	0.335887	0.410968	0.317046	-0.065524	0.582147	0.511128	0.346548	0.0626724
85	Without_Outliers	0	cf_eco_soil_unspecified	MPNN_GO_S	1.57364	0.209911		0.275166	-0.0212744	0.362764	0.117054	0.0366766	0.120798	0.143728	0.0505165		0.00433693
85	Without_Outliers	1	cf_hh_total_lower_stratosphere_and_upper_troposphere	DeepMPT_S (GROVER)	0.795299	0.393264	0.634012	0.554562	0.0900336	0.190291	0.852527	0.690991	0.60618	-1.50902	0.358043	0.649462	0.524877
85	Without_Outliers	0	cf_hh_total_soil_unspecified	MPNN_GO_S	1.15962	0.392116	0.703468	0.0115266	-0.188375	0.576431	0.492851	0.182641	0.343761	0.301277	0.40798	-0.744085	-0.0762845
86	Without_Outliers	1	cf_eco_non-agricultural_soil	RF (GROVER)	1.59879	0.323704		0.0429634	0.402635	0.232601	0.062945	0.157894	0.0624275	0.150439	0.197503	-0.0616516	0.083139
86	Without_Outliers	0	cf_eco_soil_unspecified	MPNN_GE_S	1.51943	0.263404		0.338108	0.0491427	0.279488	0.291952	-0.0925425	0.261442	0.147072	-0.41452		0.111685
86	Without_Outliers	1	cf_hh_total_non-agricultural_soil	RF (GROVER)	1.4809	0.370615	0.677658	0.262829	0.340423	0.372182	0.0428495	0.266458	0.0262792	-0.128975	0.199962	-0.03256	0.327379
86	Without_Outliers	0	cf_hh_total_soil_unspecified	MPNN_GE_S	1.10203	0.450997	0.76273	-0.00512546	-1.12122	0.332508	0.488268	0.236622	0.310147	0.468231	0.573426	-0.797835	0.653438
87	Without_Outliers	1	cf_eco_non-agricultural_soil	XGB (GROVER)	1.55542	0.359895		0.0509364	0.376218	0.335398	0.296635	0.196159	-0.0256363	0.0948854	0.230481	0.16932	0.16208
87	Without_Outliers	0	cf_eco_urban_air_close_to_ground	RF	1.36244	0.54085		0.546373	0.462127	0.194437	0.622044	0.366516	0.221037	0.34003	0.240435	0.255203	0.296814
87	Without_Outliers	1	cf_hh_total_non-agricultural_soil	XGB (GROVER)	1.4365	0.407786	0.679944	0.228978	0.485214	0.426797	0.187271	0.249431	-0.0609352	-1.00836	0.197605	-0.0297919	0.397022
87	Without_Outliers	0	cf_hh_total_urban_air_close_to_ground	RF	1.00058	0.382569	0.745881	0.372763	0.266434	0.416268	0.442327	0.230159	0.20658	0.354325	0.401168	-0.164434	0.228956
88	Without_Outliers	1	cf_eco_non-agricultural_soil	GP (GROVER)	1.50671	0.39936		0.138521	0.429846	0.360357	0.351698	0.0724208	0.0636221	0.155707	0.304506	0.218233	0.135342	1.64759
88	Without_Outliers	0	cf_eco_urban_air_close_to_ground	XGB	1.33907	0.556466		0.480265	0.330445	0.252856	0.679868	0.424578	0.317869	0.427342	0.434955	0.290778	0.313318
88	Without_Outliers	1	cf_hh_total_non-agricultural_soil	GP (GROVER)	1.43488	0.409121	0.679944	0.243586	0.423232	0.457347	0.0877017	0.31465	0.0117226	-0.738935	0.169357	0.127124	0.38988	1.47183
88	Without_Outliers	0	cf_hh_total_urban_air_close_to_ground	XGB	0.95959	0.432119	0.707292	0.306854	0.317104	0.297601	0.509787	0.249056	0.272263	0.466186	0.588444	-0.056627	0.222829
89	Without_Outliers	1	cf_eco_non-agricultural_soil	DeepMPT_S (GROVER)	0.800536	0.35054		0.537208	0.364125	0.208154	-1.07668	-0.0110286	-0.654442	0.5355	0.489689	0.403709	0.212119
89	Without_Outliers	0	cf_eco_urban_air_close_to_ground	GP	1.37785	0.530405		0.488553	0.332729	0.267832	0.580914	0.458565	0.216068	0.275384	0.348279	0.16345	0.33425	1.35578
89	Without_Outliers	1	cf_hh_total_non-agricultural_soil	DeepMPT_S (GROVER)	0.782763	0.325297	0.650515	0.703923	-0.0385439	0.162047	0.217099	0.770096	0.287855	-10.8858	0.337852	-0.108809	0.483923
89	Without_Outliers	0	cf_hh_total_urban_air_close_to_ground	GP	0.99562	0.388673	0.707292	0.343985	0.365902	0.491944	0.47866	0.24365	0.166674	0.409162	0.335659	-1.60385	0.3252	0.967506
90	Without_Outliers	1	cf_eco_non-urban_air_or_from_high_stacks	RF (GROVER)	1.5637	0.401914		0.251277	0.485093	0.28306	0.060747	0.164014	0.109069	0.0799847	0.24114	0.303264	0.201331
90	Without_Outliers	0	cf_eco_urban_air_close_to_ground	DeepMPT_S	0.675348	0.544599		0.345262	0.253673	0.841015	0.470436	0.579732	0.637963	0.496595	0.331263	0.554472	0.441263
90	Without_Outliers	1	cf_hh_total_non-urban_air_or_from_high_stacks	RF (GROVER)	1.1044	0.391718	0.677658	0.320605	0.468451	0.309094	0.0906934	0.342148	0.0960571	0.358803	0.221387	0.0381924	0.462676
90	Without_Outliers	0	cf_hh_total_urban_air_close_to_ground	DeepMPT_S	0.786815	0.439032	0.76319	0.556971	0.519597	-0.409182	0.406228	0.574589	0.119739	0.258491	0.218622	-1.9946	0.509456
91	Without_Outliers	1	cf_eco_non-urban_air_or_from_high_stacks	XGB (GROVER)	1.50932	0.442791		0.272508	0.489059	0.357146	0.2189	0.00212289	0.174147	0.0549526	0.340438	0.402514	0.256477
91	Without_Outliers	0	cf_eco_urban_air_close_to_ground	MPNN_GO_S	1.36537	0.455219		0.117563	0.229393	0.477736	0.50143	0.280197	0.315068	0.385299	0.208609	0.921423	0.048019
91	Without_Outliers	1	cf_hh_total_non-urban_air_or_from_high_stacks	XGB (GROVER)	1.08026	0.418016	0.679944	0.354241	0.518349	0.394368	0.0110154	0.317856	0.136526	-0.515664	0.167324	0.0347678	0.538877
91	Without_Outliers	0	cf_hh_total_urban_air_close_to_ground	MPNN_GO_S	0.85955	0.407716	0.727173	0.29994	-1.09421	0.569321	0.389317	0.240319	0.264337	0.267733	0.577381	-0.0821213	-0.0835024
92	Without_Outliers	1	cf_eco_non-urban_air_or_from_high_stacks	GP (GROVER)	1.52887	0.428261		0.304685	0.44761	0.294998	0.278339	0.25116	0.186673	0.110917	0.306752	0.387093	0.178885	1.63796
92	Without_Outliers	0	cf_eco_urban_air_close_to_ground	MPNN_GE_S	1.47044	0.368142		-0.388077	0.0616066	0.574196	0.623502	0.249551	0.255113	0.397412	-0.135709	0.32368	0.10796
92	Without_Outliers	1	cf_hh_total_non-urban_air_or_from_high_stacks	GP (GROVER)	1.0696	0.429442	0.679944	0.401473	0.485853	0.392599	-0.00449525	0.402187	0.0876201	0.117776	0.158515	0.229394	0.561531	1.02112
92	Without_Outliers	0	cf_hh_total_urban_air_close_to_ground	MPNN_GE_S	0.836241	0.439403	0.76273	0.297088	-0.855144	0.535877	0.547197	0.292603	0.0842465	0.400969	0.668927	-0.554048	-0.738912
93	Without_Outliers	1	cf_eco_non-urban_air_or_from_high_stacks	DeepMPT_S (GROVER)	0.77918	0.411624		0.523156	0.513349	0.278754	0.0450097	0.310576	-0.107573	0.621228	0.488828	0.388952	0.1405
93	Without_Outliers	0	cf_eco_water_unspecified	RF	1.30096	0.460302		0.436588	0.264309	0.179603	0.593523	0.357525	0.269866	0.320111	0.411316	0.770565	0.358505
93	Without_Outliers	1	cf_hh_total_non-urban_air_or_from_high_stacks	DeepMPT_S (GROVER)	0.796245	0.391222	0.655314	0.557015	0.0905539	0.173708	0.850677	0.683854	0.600595	-1.3755	0.363369	0.639448	0.520265
93	Without_Outliers	0	cf_hh_total_water_unspecified	RF	1.10345	0.487378	0.745881	0.511973	0.289105	0.343275	0.445773	0.465271	0.355965	0.374854	0.450691	-0.479859	0.433272
94	Without_Outliers	1	cf_eco_sea_water	RF (GROVER)	2.93438	0.478861		0.540264	0.260735	0.519497	0.462236	0.357823	0.235613	0.100661	0.471473	0.0335349	0.50177
94	Without_Outliers	0	cf_eco_water_unspecified	XGB	1.30778	0.454628		0.306326	0.276747	0.211491	0.74287	0.405702	0.35793	0.419754	0.560378	0.770238	0.387635
94	Without_Outliers	1	cf_hh_total_sea_water	RF (GROVER)	1.47707	0.43058	0.677658	0.347897	0.358832	0.403334	0.156271	0.279747	0.243816	0.401685	0.211644	0.373368	0.446699
94	Without_Outliers	0	cf_hh_total_water_unspecified	XGB	1.06263	0.524603	0.707292	0.525616	0.492761	0.278977	0.550016	0.519934	0.301304	0.408254	0.471919	-1.63981	0.442427
95	Without_Outliers	1	cf_eco_sea_water	XGB (GROVER)	2.73821	0.546212		0.621196	0.298526	0.559254	0.662888	0.433649	0.195215	-0.287789	0.595241	0.0647512	0.611905
95	Without_Outliers	0	cf_eco_water_unspecified	GP	1.27398	0.482457		0.44699	0.300332	0.225094	0.597384	0.399553	0.27595	0.324481	0.56615	0.578663	0.443566	1.1693
95	Without_Outliers	1	cf_hh_total_sea_water	XGB (GROVER)	1.4125	0.479275	0.679944	0.359443	0.406459	0.539937	0.129972	0.334572	0.256296	0.7195	0.226696	0.355063	0.504643
95	Without_Outliers	0	cf_hh_total_water_unspecified	GP	1.12382	0.468271	0.707292	0.56454	0.310153	0.424904	0.408748	0.439097	0.207009	0.429415	0.422456	-3.67222	0.54277	1.05449
96	Without_Outliers	1	cf_eco_sea_water	GP (GROVER)	2.65085	0.574705		0.648581	0.282193	0.593723	0.683906	0.50829	0.386652	-0.0824338	0.614204	0.277932	0.58115	2.90762
96	Without_Outliers	0	cf_eco_water_unspecified	DeepMPT_S	0.814124	0.389152		0.588332	0.465457	-0.0976236	0.363964	0.495555	0.371525	0.424991	0.404676	-1.76737	0.267834
96	Without_Outliers	1	cf_hh_total_sea_water	GP (GROVER)	1.43775	0.460495	0.679944	0.44922	0.29172	0.507064	0.201905	0.353171	0.289302	0.58113	0.242427	0.521299	0.409819	1.67936
96	Without_Outliers	0	cf_hh_total_water_unspecified	DeepMPT_S	0.806732	0.391605	0.764699	0.703731	0.624104	0.466392	0.428378	0.650345	0.394475	-0.601464	0.556861	-45.4852	0.391464
97	Without_Outliers	1	cf_eco_sea_water	DeepMPT_S (GROVER)	0.723847	0.484036		0.241873	0.551918	0.514189	0.588833	0.218716	0.659428	-2.61146	0.601323	0.495987	0.427198
97	Without_Outliers	0	cf_eco_water_unspecified	MPNN_GO_S	1.50422	0.385968		0.240881	0.360441	0.635606	0.394633	0.282985	0.330578	0.438008	0.29025	-0.682185	0.360666
97	Without_Outliers	1	cf_hh_total_sea_water	DeepMPT_S (GROVER)	0.671611	0.390262	0.645716	0.572369	0.30764	0.0748724	0.807193	0.651266	0.649957	-5.48021	0.474014	0.456854	0.430702
97	Without_Outliers	0	cf_hh_total_water_unspecified	MPNN_GO_S	0.978325	0.456517	0.70676	0.331379	-1.07012	0.567546	0.309111	0.482285	0.272459	0.340098	0.510315	-0.347321	0.33674
98	Without_Outliers	1	cf_eco_soil_unspecified	RF (GROVER)	1.59375	0.325294		0.0947575	0.397738	0.224473	0.052067	0.140397	0.120806	0.10878	0.190342	-0.0551696	0.0961872
98	Without_Outliers	0	cf_eco_water_unspecified	MPNN_GE_S	1.40776	0.46219		0.46245	0.331996	0.532498	0.481985	0.217685	0.330365	0.355589	-0.270315	0.184266	0.357064
98	Without_Outliers	1	cf_hh_total_soil_unspecified	RF (GROVER)	1.32667	0.3309	0.677658	0.233993	0.316145	0.34481	0.0391965	0.368959	-0.0238501	0.468916	0.142293	0.157135	0.319196
98	Without_Outliers	0	cf_hh_total_water_unspecified	MPNN_GE_S	0.97135	0.46424	0.76273	0.250203	-1.41851	0.622518	0.494098	0.489647	0.0936893	0.543719	0.608036	-1.98793	0.199505
99	Without_Outliers	1	cf_eco_agricultural_soil	DeepMPT_M	1.01721	-0.121771		0.398241	0.151997	0.0497734	-0.0246521	-0.0292181	-1.94297	0.347614	0.369129	-0.157941	0.3462
99	Without_Outliers	1	cf_eco_soil_unspecified	XGB (GROVER)	1.53606	0.373255		0.0559638	0.42903	0.328918	0.173726	0.106708	0.0229575	0.0613388	0.317416	0.125827	0.0703996
99	Without_Outliers	1	cf_hh_total_agricultural_soil	DeepMPT_M	0.834051	0.338172	0.577711	0.122294	0.355671	0.608775	0.2578	0.517458	0.186474	0.169038	-0.40623	0.61585	0.386817
99	Without_Outliers	1	cf_hh_total_soil_unspecified	XGB (GROVER)	1.28791	0.369428	0.679944	0.259106	0.435881	0.428693	0.202022	0.301277	-0.0538622	-0.207246	0.130391	0.106859	0.375129
100	Without_Outliers	1	cf_eco_air_indoor	DeepMPT_M	0.848107	0.182449		0.495858	0.352245	0.612345	-0.148369	0.0917295	-0.0442874	0.339354	0.494145	0.442003	0.332652
100	Without_Outliers	1	cf_eco_soil_unspecified	GP (GROVER)	1.50677	0.396932		0.120238	0.428458	0.358759	0.35554	0.0740926	0.0673236	0.154289	0.294639	0.232367	0.137289	1.64849
100	Without_Outliers	1	cf_hh_total_air_indoor	DeepMPT_M	0.818172	0.321938	0.5673	0.337576	-0.220577	0.296178	0.385181	0.418414	-0.0220822	0.120044	0.137633	0.131359	0.536718
100	Without_Outliers	1	cf_hh_total_soil_unspecified	GP (GROVER)	1.29712	0.360371	0.679944	0.229566	0.367367	0.442514	0.0610611	0.409803	-0.0221389	0.24608	0.083778	0.229504	0.348378	1.2807
101	Without_Outliers	1	cf_eco_air_unspecified	DeepMPT_M	0.847865	0.178837		0.607667	0.372748	0.594951	-0.162139	0.0466282	-0.0373728	0.336744	0.467657	0.467809	0.266856
101	Without_Outliers	1	cf_eco_soil_unspecified	DeepMPT_S (GROVER)	0.808195	0.337331		0.519852	0.357468	0.188271	-1.23974	-0.0687857	-0.67907	0.517319	0.480674	0.357318	0.229656
101	Without_Outliers	1	cf_hh_total_air_unspecified	DeepMPT_M	0.808479	0.352425	0.572714	0.373074	-0.0401635	0.273282	0.367029	0.480494	0.0948105	0.164332	0.128769	-0.0288789	0.492559
101	Without_Outliers	1	cf_hh_total_soil_unspecified	DeepMPT_S (GROVER)	0.806937	0.310864	0.649696	0.732661	-0.190858	0.251127	0.264351	0.72678	0.42997	-3.64418	0.283978	-0.351573	0.367714
102	Without_Outliers	1	cf_eco_fresh_water	DeepMPT_M	1.0099	-0.160831		0.328859	0.159747	0.645912	-0.43343	0.172987	-1.36526	0.0565456	0.592469	0.460688	0.436481
102	Without_Outliers	1	cf_eco_urban_air_close_to_ground	RF (GROVER)	1.51458	0.398002		0.270766	0.514261	0.257313	0.0520957	0.158674	0.0921912	0.0846029	0.268628	0.277672	0.148458
102	Without_Outliers	1	cf_hh_total_fresh_water	DeepMPT_M	0.840326	0.350379	0.567133	0.50269	0.455515	0.485889	0.25946	0.570491	0.150613	0.0754477	-0.333845	0.497382	0.294626
102	Without_Outliers	1	cf_hh_total_urban_air_close_to_ground	RF (GROVER)	0.982399	0.338054	0.677658	0.237824	0.479295	0.317521	0.139707	0.402914	0.034051	-0.530321	0.139283	0.0595268	0.413254
103	Without_Outliers	1	cf_eco_lower_stratosphere_and_upper_troposphere	DeepMPT_M	0.850556	0.182641		0.479706	0.317093	0.554817	-0.0799118	-0.0245224	-0.136909	0.450876	0.406999	0.518831	0.301929
103	Without_Outliers	1	cf_eco_urban_air_close_to_ground	XGB (GROVER)	1.4304	0.463062		0.287605	0.533851	0.361194	0.226999	0.132823	0.216098	0.114504	0.389187	0.466076	0.232686
103	Without_Outliers	1	cf_hh_total_lower_stratosphere_and_upper_troposphere	DeepMPT_M	0.819802	0.342465	0.57313	0.402229	-0.149895	0.306515	0.341227	0.4902	0.172921	0.193404	0.192018	0.0777109	0.352725
103	Without_Outliers	1	cf_hh_total_urban_air_close_to_ground	XGB (GROVER)	0.949357	0.381833	0.679944	0.390808	0.587557	0.363563	0.105807	0.462313	-0.0203923	-1.62752	0.124039	0.0546734	0.471323
104	Without_Outliers	1	cf_eco_non-agricultural_soil	DeepMPT_M	1.02171	-0.145746		0.39779	0.120721	0.0702102	-0.0284152	-0.0764277	-1.96392	0.295339	0.36035	-0.170338	0.329309
104	Without_Outliers	1	cf_eco_urban_air_close_to_ground	GP (GROVER)	1.46342	0.437985		0.321555	0.454799	0.300036	0.279579	0.287133	0.193372	0.1297	0.348588	0.461919	0.16623	1.57658
104	Without_Outliers	1	cf_hh_total_non-agricultural_soil	DeepMPT_M	0.852914	0.294102	0.572547	0.227636	-0.0743104	0.280564	0.178367	0.455995	0.201767	0.216969	-0.394381	0.645919	0.176015
104	Without_Outliers	1	cf_hh_total_urban_air_close_to_ground	GP (GROVER)	0.977756	0.344296	0.679944	0.331909	0.517621	0.354576	-0.121597	0.462648	-0.0186308	-0.559777	0.0123625	0.193597	0.436017	0.930097
105	Without_Outliers	1	cf_eco_non-urban_air_or_from_high_stacks	DeepMPT_M	0.851738	0.176755		0.584792	0.336484	0.554839	-0.104735	-0.0218903	-0.156017	0.448681	0.399191	0.525252	0.23055
105	Without_Outliers	1	cf_eco_urban_air_close_to_ground	DeepMPT_S (GROVER)	0.781878	0.416333		0.492103	0.460744	0.270844	0.21787	0.311953	-0.0174174	0.630728	0.507554	0.464876	0.173679
105	Without_Outliers	1	cf_hh_total_non-urban_air_or_from_high_stacks	DeepMPT_M	0.818256	0.344334	0.571131	0.404872	-0.136466	0.284004	0.356166	0.489482	0.185308	0.171827	0.200074	0.116701	0.365024
105	Without_Outliers	1	cf_hh_total_urban_air_close_to_ground	DeepMPT_S (GROVER)	0.835429	0.36015	0.643375	0.591801	0.04894	0.148861	0.728068	0.652475	0.605563	-20.4207	0.293729	0.577812	0.381699
106	Without_Outliers	1	cf_eco_sea_water	DeepMPT_M	0.752114	0.433238		0.651946	0.374537	0.587111	0.48557	0.49643	0.0524437	0.578338	0.677061	0.0668885	0.520326
106	Without_Outliers	1	cf_eco_water_unspecified	RF (GROVER)	1.30058	0.374823		0.282686	0.280503	0.315749	0.120576	0.131435	0.0614135	0.00224262	0.3634	-0.0076039	0.233863
106	Without_Outliers	1	cf_hh_total_sea_water	DeepMPT_M	0.761393	0.350185	0.581626	0.488322	0.437144	0.413429	0.428875	0.388516	0.104449	0.126686	-0.34802	0.40994	0.2864
106	Without_Outliers	1	cf_hh_total_water_unspecified	RF (GROVER)	1.14112	0.390904	0.677658	0.263282	0.403394	0.373781	0.187892	0.351247	0.146132	0.399	0.242039	0.0753395	0.449282
107	Without_Outliers	1	cf_eco_soil_unspecified	DeepMPT_M	1.01678	-0.130157		0.399017	0.129924	0.0563065	-0.0247775	-0.0417684	-1.96132	0.340837	0.365178	-0.165486	0.339522
107	Without_Outliers	1	cf_eco_water_unspecified	XGB (GROVER)	1.20635	0.462132		0.347418	0.37717	0.394427	0.247737	0.123601	-0.0824414	0.217583	0.485685	0.304723	0.420912
107	Without_Outliers	1	cf_hh_total_soil_unspecified	DeepMPT_M	0.848539	0.313646	0.578877	0.124932	0.222528	0.577283	0.219998	0.486614	0.176327	0.206335	-0.421707	0.475514	0.388291
107	Without_Outliers	1	cf_hh_total_water_unspecified	XGB (GROVER)	1.11357	0.419964	0.679944	0.306726	0.485676	0.405923	0.411272	0.36944	0.105976	0.502928	0.231224	0.195665	0.456468
108	Without_Outliers	1	cf_eco_urban_air_close_to_ground	DeepMPT_M	0.849778	0.171793		0.607668	0.381774	0.605524	-0.190944	0.0735487	-0.0425003	0.331536	0.374493	0.409095	0.294862
108	Without_Outliers	1	cf_eco_water_unspecified	GP (GROVER)	1.22916	0.441603		0.38858	0.280636	0.353032	0.33933	0.199908	0.219839	0.0598282	0.490486	0.251841	0.29198	1.46983
108	Without_Outliers	1	cf_hh_total_urban_air_close_to_ground	DeepMPT_M	0.811812	0.343397	0.576712	0.374304	-0.186278	0.332109	0.373005	0.457456	0.0495003	0.194223	0.108631	-0.0424592	0.518543
108	Without_Outliers	1	cf_hh_total_water_unspecified	GP (GROVER)	1.11665	0.416747	0.679944	0.367516	0.397881	0.443257	0.283167	0.383423	0.107575	0.379119	0.172649	0.40549	0.401553	1.13722
109	Without_Outliers	1	cf_eco_water_unspecified	DeepMPT_S (GROVER)	0.810459	0.38001		0.379586	0.336422	0.168981	0.41052	0.0796847	-0.0304044	0.403939	0.524857	0.386101	0.325814
109	Without_Outliers	1	cf_eco_water_unspecified	DeepMPT_M	1.0009	-0.140174		0.330413	0.166651	0.631027	-0.394332	0.181467	-1.30617	0.067764	0.600654	0.419046	0.425281
109	Without_Outliers	1	cf_hh_total_water_unspecified	DeepMPT_S (GROVER)	0.7411	0.378883	0.646536	0.70301	0.130592	0.0594181	0.696944	0.58179	0.653025	-3.58991	0.357714	0.482064	0.445571
109	Without_Outliers	1	cf_hh_total_water_unspecified	DeepMPT_M	0.858698	0.323816	0.569049	0.503045	0.462383	0.427096	0.227943	0.53292	0.0962273	0.0853593	-0.339524	0.504042	0.267311
110	Without_Outliers	2	cf_eco_agricultural_soil	DeepMPT_M (GROVER)	0.796967	0.397593		0.174325	0.466192	0.322643	0.517868	0.47062	0.602038	-15.5024	0.390161	0.0455961	0.384893
110	Without_Outliers	1	cf_eco_agricultural_soil	MPNN_GO_M	1.18705	0.515308		0.657758	0.102259	0.359835	0.362432	0.497812	0.372438	0.264392	0.318817		0.00257887
110	Without_Outliers	1	cf_hh_total_agricultural_soil	MPNN_GO_M	1.36196	0.34175	0.652154	0.0248961	0.65993	0.398061	0.17483	0.446034	0.316742	0.174789	0.248043	0.106972	0.105704
110	Without_Outliers	2	cf_hh_total_agricultural_soil	DeepMPT_M (GROVER)	0.82206	0.30474	0.600662	0.14404	0.064768	0.434113	0.0845323	0.444195	0.566432	0.739269	0.356418	0.498091	0.322271
111	Without_Outliers	1	cf_eco_air_indoor	MPNN_GO_M	1.12002	0.610041		0.480987	0.373323	0.378087	0.653541	0.546749	0.37388	0.36471	0.390208	-7.07432	0.236401
111	Without_Outliers	2	cf_eco_air_indoor	DeepMPT_M (GROVER)	0.749124	0.474927		0.419116	0.565608	0.426483	0.473262	0.566311	0.779895	0.219078	0.38176	0.368998	0.45028
111	Without_Outliers	1	cf_hh_total_air_indoor	MPNN_GO_M	0.988506	0.409188	0.652154	0.0246132	0.538959	0.0361491	0.422472	0.250525	0.290123	0.0802201	0.0964514	0.807399	0.130419
111	Without_Outliers	2	cf_hh_total_air_indoor	DeepMPT_M (GROVER)	0.844352	0.272083	0.615813	0.32739	0.0257574	0.402345	-0.108308	0.363337	0.441583	-176.381	0.43737	0.231234	0.139962
112	Without_Outliers	1	cf_eco_air_unspecified	MPNN_GO_M	1.12021	0.603778		0.516035	0.377908	0.371655	0.652679	0.545335	0.381535	0.35136	0.384655		0.203145
112	Without_Outliers	2	cf_eco_air_unspecified	DeepMPT_M (GROVER)	0.749008	0.4737		0.391093	0.564459	0.379428	0.458259	0.611617	0.758059	0.199649	0.381344	0.381146	0.446096
112	Without_Outliers	1	cf_hh_total_air_unspecified	MPNN_GO_M	1.00336	0.441845	0.653077	-0.216154	0.676548	0.387726	0.473283	0.315406	0.371464	0.199065	0.0823791	0.286905	0.173469
112	Without_Outliers	2	cf_hh_total_air_unspecified	DeepMPT_M (GROVER)	0.833009	0.302643	0.611459	0.43033	0.057269	0.473733	0.0458353	0.448652	0.53329	-2.75689	0.374467	0.35579	0.0728806
113	Without_Outliers	1	cf_eco_fresh_water	MPNN_GO_M	0.985953	0.551997		0.404302	0.132938	0.517701	0.470565	0.422178	0.446984	0.3307	0.625183		0.462925
113	Without_Outliers	2	cf_eco_fresh_water	DeepMPT_M (GROVER)	0.769695	0.434613		0.245312	0.433729	0.360882	0.403595	0.491491	0.856986	-0.924942	0.449106	0.170605	0.352903
113	Without_Outliers	1	cf_hh_total_fresh_water	MPNN_GO_M	1.14836	0.481248	0.652923	-0.0590141	0.767637	0.429631	0.370822	0.691301	0.50937	0.0383135	0.0888415	0.438135	0.0392426
113	Without_Outliers	2	cf_hh_total_fresh_water	DeepMPT_M (GROVER)	0.777136	0.368439	0.592999	0.103205	0.209126	0.494096	0.196855	0.506681	0.506824	0.491948	0.382289	0.576415	0.388064
114	Without_Outliers	1	cf_eco_lower_stratosphere_and_upper_troposphere	MPNN_GO_M	1.14939	0.610345		0.49549	0.428525	0.390846	0.679378	0.524775	0.355559	0.35819	0.357061		0.191623
114	Without_Outliers	2	cf_eco_lower_stratosphere_and_upper_troposphere	DeepMPT_M (GROVER)	0.752725	0.463765		0.40753	0.548017	0.413962	0.458722	0.581252	0.694485	0.194112	0.371752	0.370217	0.452562
114	Without_Outliers	1	cf_hh_total_lower_stratosphere_and_upper_troposphere	MPNN_GO_M	1.11888	0.456695	0.652154	-0.304734	0.675609	0.478472	0.472055	0.469594	0.389103	0.194827	0.182854	-0.121231	0.0877254
114	Without_Outliers	2	cf_hh_total_lower_stratosphere_and_upper_troposphere	DeepMPT_M (GROVER)	0.842406	0.336726	0.602665	0.510034	-0.016283	0.536993	0.174842	0.391404	0.463931	0.338024	0.361211	0.346235	0.0674335
115	Without_Outliers	2	cf_eco_non-agricultural_soil	DeepMPT_M (GROVER)	0.793957	0.401601		0.162718	0.473635	0.329968	0.527277	0.452081	0.604186	-14.3412	0.390909	0.074248	0.395573
115	Without_Outliers	1	cf_eco_non-agricultural_soil	MPNN_GO_M	1.18138	0.519338		0.649381	0.115546	0.323748	0.368576	0.514123	0.36732	0.270679	0.325551		0.0515128
115	Without_Outliers	2	cf_hh_total_non-agricultural_soil	DeepMPT_M (GROVER)	0.781513	0.315081	0.622954	-0.213104	0.19568	0.463175	0.62525	0.3383	0.27335	0.62593	0.41873	0.366817	0.358063
115	Without_Outliers	1	cf_hh_total_non-agricultural_soil	MPNN_GO_M	1.43222	0.376309	0.651846	0.150003	0.59037	0.439619	0.238102	0.435336	0.326355	0.25039	0.157392	-0.0508759	0.233513
116	Without_Outliers	1	cf_eco_non-urban_air_or_from_high_stacks	MPNN_GO_M	1.14225	0.609115		0.519492	0.414126	0.396922	0.682112	0.538838	0.370469	0.364777	0.305045		0.199382
116	Without_Outliers	2	cf_eco_non-urban_air_or_from_high_stacks	DeepMPT_M (GROVER)	0.749463	0.464801		0.388085	0.545462	0.370635	0.432194	0.636945	0.700752	0.212807	0.381067	0.355429	0.447118
116	Without_Outliers	1	cf_hh_total_non-urban_air_or_from_high_stacks	MPNN_GO_M	1.11695	0.458573	0.652462	-0.302878	0.657548	0.477829	0.47419	0.476761	0.411582	0.188847	0.204362	0.1678	0.0727124
116	Without_Outliers	2	cf_hh_total_non-urban_air_or_from_high_stacks	DeepMPT_M (GROVER)	0.841198	0.337966	0.608499	0.516364	0.00750721	0.512459	0.154079	0.396335	0.409456	0.180141	0.355313	0.322718	0.124866
117	Without_Outliers	1	cf_eco_sea_water	MPNN_GO_M	2.40568	0.608743		0.246668	0.200625	0.7332	0.506271	0.478593	0.666857	0.61264	-0.466211		0.420271
117	Without_Outliers	2	cf_eco_sea_water	DeepMPT_M (GROVER)	0.691739	0.543403		0.43495	0.548819	0.613098	0.226681	0.426728	0.746276	0.938157	0.607412	-0.0851821	0.578921
117	Without_Outliers	1	cf_hh_total_sea_water	MPNN_GO_M	1.73054	0.429308	0.652615	-0.0882232	0.727779	-0.90497	0.395522	0.749512	0.631818	0.301326	-0.0283774	0.540678	-0.0638188
117	Without_Outliers	2	cf_hh_total_sea_water	DeepMPT_M (GROVER)	0.733305	0.375154	0.615987	0.242175	0.349365	0.584831	0.0367994	-0.171009	0.4673	-0.647204	0.331334	0.50242	0.503019
118	Without_Outliers	2	cf_eco_soil_unspecified	DeepMPT_M (GROVER)	0.800592	0.392738		0.146482	0.468256	0.317374	0.509111	0.456892	0.604122	-12.7557	0.387363	0.0287567	0.384029
118	Without_Outliers	1	cf_eco_soil_unspecified	MPNN_GO_M	1.18388	0.516246		0.653929	0.0905195	0.350256	0.367303	0.502801	0.356292	0.268519	0.333575		0.0571709
118	Without_Outliers	1	cf_hh_total_soil_unspecified	MPNN_GO_M	1.34801	0.351564	0.651385	0.064968	0.663874	0.450395	0.196957	0.455134	0.324757	0.185335	0.296398	-0.361492	0.126721
118	Without_Outliers	2	cf_hh_total_soil_unspecified	DeepMPT_M (GROVER)	0.818502	0.29853	0.612766	0.111951	0.0764471	0.430549	0.153554	0.439748	0.473194	0.745091	0.360157	0.464022	0.336337
119	Without_Outliers	1	cf_eco_urban_air_close_to_ground	MPNN_GO_M	1.11994	0.604192		0.496587	0.376721	0.377885	0.647027	0.543168	0.398538	0.336034	0.39314		0.217338
119	Without_Outliers	2	cf_eco_urban_air_close_to_ground	DeepMPT_M (GROVER)	0.746356	0.477477		0.431479	0.571847	0.375226	0.482937	0.621293	0.782378	0.210868	0.376957	0.379907	0.440822
119	Without_Outliers	1	cf_hh_total_urban_air_close_to_ground	MPNN_GO_M	0.997573	0.427998	0.651231	-0.201567	0.666568	0.308925	0.428606	0.287114	0.352722	0.20881	0.0406948	0.626945	0.178618
119	Without_Outliers	2	cf_hh_total_urban_air_close_to_ground	DeepMPT_M (GROVER)	0.836827	0.291779	0.613027	0.429318	0.0560816	0.433564	-0.0172266	0.463352	0.532163	-6.81721	0.39479	0.325949	0.0920123
120	Without_Outliers	2	cf_eco_water_unspecified	DeepMPT_M (GROVER)	0.765668	0.440512		0.293062	0.449779	0.351349	0.506815	0.477931	0.832781	-0.682576	0.432634	0.209902	0.379733
120	Without_Outliers	1	cf_eco_water_unspecified	MPNN_GO_M	0.981525	0.556012		0.401122	0.136635	0.515259	0.480628	0.427906	0.455376	0.330286	0.643554		0.468251
120	Without_Outliers	1	cf_hh_total_water_unspecified	MPNN_GO_M	1.15377	0.481133	0.652615	-0.0637059	0.778476	0.412164	0.380677	0.70787	0.521989	0.00948643	0.0828772	0.363899	0.00323087
120	Without_Outliers	2	cf_hh_total_water_unspecified	DeepMPT_M (GROVER)	0.785112	0.354918	0.611024	0.0521849	0.216024	0.479545	0.130189	0.471715	0.510502	0.347331	0.380631	0.559511	0.380475
121	Without_Outliers	1	cf_eco_agricultural_soil	MPNN_GE_M	1.23294	0.477105		0.647567	0.12049	0.315089	0.293303	0.268684	0.2594	0.290948	0.323818		0.146905
121	Without_Outliers	2	cf_eco_agricultural_soil	RF (GROVER)	1.54071	0.355909		0.159676	0.382915	0.28985	0.178996	0.0883568	-0.0262031	-0.0849532	0.155758	-0.311832	0.177884
121	Without_Outliers	2	cf_hh_total_agricultural_soil	RF (GROVER)	1.29242	0.367563	0.691284	0.190325	0.399964	0.353946	0.346253	0.457229	-0.246688	-0.465327	0.258125	0.217828	0.250718
121	Without_Outliers	1	cf_hh_total_agricultural_soil	MPNN_GE_M	1.26018	0.436455	0.666923	0.0542151	0.657502	0.43976	0.114714	0.551369	0.438195	0.255011	0.031278	-1.53275	0.483771
122	Without_Outliers	2	cf_eco_agricultural_soil	XGB (GROVER)	1.47594	0.408922		0.0904294	0.383583	0.418144	0.320423	0.0505075	-0.155959	0.0264346	0.291937	0.0862128	0.341668
122	Without_Outliers	1	cf_eco_air_indoor	MPNN_GE_M	1.15937	0.582163		0.605151	0.358648	0.303411	0.569048	0.413294	0.232744	0.385271	0.477131	-13.4342	0.253567
122	Without_Outliers	2	cf_hh_total_agricultural_soil	XGB (GROVER)	1.23218	0.425146	0.739792	0.279269	0.397675	0.42445	0.530213	0.54815	-0.272732	-0.386432	0.295875	0.152596	0.327632
122	Without_Outliers	1	cf_hh_total_air_indoor	MPNN_GE_M	0.938302	0.467676	0.661231	0.148481	0.626813	-0.0648869	0.336574	0.380946	0.38333	0.332093	0.304772	0.304123	0.202136
123	Without_Outliers	2	cf_eco_agricultural_soil	GP (GROVER)	1.48578	0.401014		0.162379	0.399933	0.350745	0.30721	0.00645056	-0.0408786	-0.0665599	0.268344	0.229879	0.191097	1.65005
123	Without_Outliers	1	cf_eco_air_unspecified	MPNN_GE_M	1.16166	0.573908		0.650125	0.357684	0.304515	0.558858	0.402046	0.208555	0.419369	0.466634		0.248755
123	Without_Outliers	2	cf_hh_total_agricultural_soil	GP (GROVER)	1.24907	0.409281	0.739792	0.195523	0.357534	0.396982	0.604351	0.522919	-0.605014	-0.650217	0.306332	0.252487	0.340595	1.28583
123	Without_Outliers	1	cf_hh_total_air_unspecified	MPNN_GE_M	0.944218	0.505704	0.659385	0.0320613	0.669149	0.281027	0.351863	0.487159	0.49975	0.397033	0.360619	-1.26391	0.241049
124	Without_Outliers	2	cf_eco_agricultural_soil	DeepMPT_S (GROVER)	0.796967	0.397593		0.174325	0.466192	0.322643	0.517868	0.47062	0.602038	-15.5024	0.390161	0.0455961	0.384893
124	Without_Outliers	1	cf_eco_fresh_water	MPNN_GE_M	1.0055	0.534058		0.521498	0.0955959	0.439849	0.515976	0.270731	0.332906	0.344566	0.760948		0.403368
124	Without_Outliers	2	cf_hh_total_agricultural_soil	DeepMPT_S (GROVER)	0.82206	0.30474	0.600662	0.14404	0.064768	0.434113	0.0845323	0.444195	0.566432	0.739269	0.356418	0.498091	0.322271
124	Without_Outliers	1	cf_hh_total_fresh_water	MPNN_GE_M	1.04403	0.571224	0.66	0.133813	0.798356	0.249928	0.291807	0.749373	0.635363	0.272054	0.0545313	-2.24381	0.389034
125	Without_Outliers	2	cf_eco_air_indoor	RF (GROVER)	1.58582	0.400561		0.250398	0.338356	0.322626	0.00141432	0.237339	-0.042246	-0.0506299	0.310992	-0.161322	0.349142
125	Without_Outliers	1	cf_eco_lower_stratosphere_and_upper_troposphere	MPNN_GE_M	1.19504	0.578782		0.616417	0.368791	0.30141	0.575143	0.400076	0.193657	0.386482	0.389258		0.250788
125	Without_Outliers	2	cf_hh_total_air_indoor	RF (GROVER)	0.916045	0.339069	0.691284	0.246029	0.434331	0.169879	0.277465	0.393227	0.0836411	0.406807	0.175553	0.208573	0.29057
125	Without_Outliers	1	cf_hh_total_lower_stratosphere_and_upper_troposphere	MPNN_GE_M	1.03699	0.533312	0.652615	0.0819667	0.611128	0.330735	0.363114	0.629612	0.540087	0.394271	0.413745	-3.88165	0.242911
126	Without_Outliers	2	cf_eco_air_indoor	XGB (GROVER)	1.52805	0.443441		0.362492	0.316926	0.413428	0.160603	0.293185	0.0815955	-0.0538872	0.379145	0.072984	0.349395
126	Without_Outliers	1	cf_eco_non-agricultural_soil	MPNN_GE_M	1.23665	0.473311		0.642752	0.105285	0.298138	0.297471	0.279122	0.261003	0.294292	0.327538		0.0947127
126	Without_Outliers	2	cf_hh_total_air_indoor	XGB (GROVER)	0.884511	0.383789	0.739792	0.333006	0.506693	0.217701	0.317608	0.40926	0.101205	0.586141	0.211058	0.281465	0.303442
126	Without_Outliers	1	cf_hh_total_non-agricultural_soil	MPNN_GE_M	1.34485	0.450085	0.659385	0.166336	0.570272	0.41824	0.233223	0.503133	0.437965	0.267084	-0.0837479	-3.67125	0.564662
127	Without_Outliers	2	cf_eco_air_indoor	GP (GROVER)	1.50993	0.456566		0.30626	0.39666	0.383453	0.0954473	0.263173	0.0605358	-0.0620303	0.393735	0.243098	0.331908	1.54698
127	Without_Outliers	1	cf_eco_non-urban_air_or_from_high_stacks	MPNN_GE_M	1.19385	0.572998		0.654649	0.358301	0.300967	0.564758	0.401759	0.180322	0.412113	0.374385		0.242807
127	Without_Outliers	2	cf_hh_total_air_indoor	GP (GROVER)	0.892072	0.373209	0.739792	0.300777	0.485499	0.224005	0.278284	0.436019	-0.0479031	0.452845	0.198145	0.420584	0.221487	0.939588
127	Without_Outliers	1	cf_hh_total_non-urban_air_or_from_high_stacks	MPNN_GE_M	1.03677	0.533516	0.670308	0.0963822	0.618446	0.336803	0.34928	0.622797	0.546055	0.38788	0.434382	-3.5938	0.247086
128	Without_Outliers	2	cf_eco_air_indoor	DeepMPT_S (GROVER)	0.749124	0.474927		0.419116	0.565608	0.426483	0.473262	0.566311	0.779895	0.219078	0.38176	0.368998	0.45028
128	Without_Outliers	1	cf_eco_sea_water	MPNN_GE_M	2.4526	0.593331		0.316672	0.228218	0.67877	0.440893	0.435634	0.582893	0.70577	0.06727		0.37675
128	Without_Outliers	2	cf_hh_total_air_indoor	DeepMPT_S (GROVER)	0.844352	0.272083	0.615813	0.32739	0.0257574	0.402345	-0.108308	0.363337	0.441583	-176.381	0.43737	0.231234	0.139962
128	Without_Outliers	1	cf_hh_total_sea_water	MPNN_GE_M	1.62912	0.49424	0.658	-0.030672	0.803574	-0.312103	0.436976	0.742875	0.692507	0.329553	-0.00323833	-0.718596	0.397835
129	Without_Outliers	2	cf_eco_air_unspecified	RF (GROVER)	1.48999	0.402538		0.304859	0.384227	0.280241	0.0729535	0.153573	0.189249	-0.0333491	0.371061	0.23488	0.22084
129	Without_Outliers	1	cf_eco_soil_unspecified	MPNN_GE_M	1.23557	0.473082		0.64486	0.10971	0.305228	0.293939	0.271371	0.259571	0.289337	0.305772		0.107656
129	Without_Outliers	2	cf_hh_total_air_unspecified	RF (GROVER)	0.968763	0.369762	0.691284	0.281	0.447334	0.225992	0.27811	0.400649	0.144612	0.35406	0.184958	0.230164	0.354483
129	Without_Outliers	1	cf_hh_total_soil_unspecified	MPNN_GE_M	1.25896	0.434405	0.649231	0.0770169	0.656988	0.43634	0.143108	0.550874	0.43632	0.249982	0.0132167	-2.29133	0.480076
130	Without_Outliers	2	cf_eco_air_unspecified	XGB (GROVER)	1.40679	0.4674		0.393053	0.466864	0.362907	0.253377	0.15463	0.138224	-0.0118226	0.421937	0.474071	0.305799
130	Without_Outliers	1	cf_eco_urban_air_close_to_ground	MPNN_GE_M	1.15872	0.576307		0.64602	0.365148	0.305914	0.559163	0.394815	0.217656	0.418812	0.493298		0.258382
130	Without_Outliers	2	cf_hh_total_air_unspecified	XGB (GROVER)	0.934814	0.41316	0.739792	0.349075	0.507844	0.279723	0.311142	0.405889	0.239817	0.469259	0.249457	0.271988	0.356706
130	Without_Outliers	1	cf_hh_total_urban_air_close_to_ground	MPNN_GE_M	0.934636	0.497897	0.659077	0.0504119	0.67933	0.207175	0.354007	0.450908	0.482277	0.390755	0.358551	-0.578774	0.231109
131	Without_Outliers	2	cf_eco_air_unspecified	GP (GROVER)	1.39682	0.47492		0.383495	0.422108	0.359676	0.299819	0.29728	0.228147	0.0252633	0.461168	0.457762	0.311878	1.59747
131	Without_Outliers	1	cf_eco_water_unspecified	MPNN_GE_M	1.00668	0.532965		0.51987	0.0860209	0.438349	0.512235	0.278016	0.334808	0.338768	0.757726		0.400533
131	Without_Outliers	2	cf_hh_total_air_unspecified	GP (GROVER)	0.93067	0.418351	0.739792	0.358126	0.464947	0.339377	0.227723	0.48561	0.0440296	0.375725	0.253815	0.387543	0.310074	0.943165
131	Without_Outliers	1	cf_hh_total_water_unspecified	MPNN_GE_M	1.04517	0.574215	0.660308	0.135691	0.802507	0.251237	0.288059	0.749391	0.643854	0.271593	0.0325038	-2.6559	0.390597
132	Without_Outliers	1	cf_eco_agricultural_soil	RF	1.32535	0.463487		0.491386	0.315592	0.167566	0.260846	0.234004	0.234624	0.0999212	0.324492	0.373173	0.357875
132	Without_Outliers	2	cf_eco_air_unspecified	DeepMPT_S (GROVER)	0.749008	0.4737		0.391093	0.564459	0.379428	0.458259	0.611617	0.758059	0.199649	0.381344	0.381146	0.446096
132	Without_Outliers	1	cf_hh_total_agricultural_soil	RF	1.29105	0.362299	0.728703	0.141231	0.250034	0.331523	0.43428	0.224174	0.171233	0.379921	0.187102	-0.163706	0.370089
132	Without_Outliers	2	cf_hh_total_air_unspecified	DeepMPT_S (GROVER)	0.833009	0.302643	0.611459	0.43033	0.057269	0.473733	0.0458353	0.448652	0.53329	-2.75689	0.374467	0.35579	0.0728806
133	Without_Outliers	1	cf_eco_agricultural_soil	XGB	1.39561	0.405092		0.0581387	0.355819	0.287707	0.347921	0.248454	0.342239	0.156587	0.255508	0.325848	0.277344
133	Without_Outliers	2	cf_eco_fresh_water	RF (GROVER)	1.24637	0.376304		0.280172	0.323112	0.306639	0.234138	0.218139	0.074547	-0.0313223	0.347181	0.286318	0.245699
133	Without_Outliers	1	cf_hh_total_agricultural_soil	XGB	1.2262	0.424753	0.713245	0.175689	0.372219	0.484555	0.511885	0.124636	0.172472	0.584429	0.169728	-0.270169	0.440645
133	Without_Outliers	2	cf_hh_total_fresh_water	RF (GROVER)	1.18207	0.422799	0.691284	0.295786	0.529401	0.324824	0.470858	0.460002	0.19899	-0.592287	0.310436	0.314357	0.253924
134	Without_Outliers	1	cf_eco_agricultural_soil	GP	1.36316	0.432435		0.267065	0.233072	0.336381	0.285493	0.228286	0.33473	0.0404812	0.202295	0.395842	0.403977	1.4364
134	Without_Outliers	2	cf_eco_fresh_water	XGB (GROVER)	1.16275	0.457186		0.347472	0.411013	0.39593	0.315547	0.39334	0.0797151	-0.0071175	0.430694	0.495964	0.327389
134	Without_Outliers	1	cf_hh_total_agricultural_soil	GP	1.23967	0.412047	0.713245	0.0526911	0.252474	0.32291	0.447304	0.299732	0.215754	0.505249	0.157678	-0.174712	0.49932	1.18305
134	Without_Outliers	2	cf_hh_total_fresh_water	XGB (GROVER)	1.11608	0.485446	0.739792	0.408018	0.600992	0.398701	0.571559	0.497989	0.286158	-0.508005	0.359975	0.353792	0.296754
135	Without_Outliers	1	cf_eco_agricultural_soil	DeepMPT_S	0.916339	0.117981		0.450872	0.465042	0.35227	0.206594	-0.222652	0.158428	0.586511	0.543822	-0.0974501	0.539535
135	Without_Outliers	2	cf_eco_fresh_water	GP (GROVER)	1.15121	0.467911		0.325743	0.420259	0.399606	0.40396	0.364145	0.145369	0.0949802	0.465086	0.549781	0.312642	1.49007
135	Without_Outliers	1	cf_hh_total_agricultural_soil	DeepMPT_S	0.780751	0.420058	0.629685	0.345859	0.288448	0.585055	0.236878	0.503632	0.278684	0.429269	-0.187998	0.771312	0.717707
135	Without_Outliers	2	cf_hh_total_fresh_water	GP (GROVER)	1.13447	0.468352	0.739792	0.396449	0.518298	0.395428	0.624779	0.446581	0.0354319	-0.715851	0.367603	0.38516	0.293126	1.12499
136	Without_Outliers	1	cf_eco_agricultural_soil	MPNN_GO_S	1.51775	0.406155		0.296591	0.0196968	0.116257	0.00915675	0.304011	0.319928	0.193612	0.424787	-22.1537	0.26799
136	Without_Outliers	2	cf_eco_fresh_water	DeepMPT_S (GROVER)	0.769695	0.434613		0.245312	0.433729	0.360882	0.403595	0.491491	0.856986	-0.924942	0.449106	0.170605	0.352903
136	Without_Outliers	1	cf_hh_total_agricultural_soil	MPNN_GO_S	1.3433	0.359656	0.654923	0.0718709	0.483582	0.724255	0.162571	0.451717	0.322075	0.157795	0.224583	0.0604949	0.23637
136	Without_Outliers	2	cf_hh_total_fresh_water	DeepMPT_S (GROVER)	0.777136	0.368439	0.592999	0.103205	0.209126	0.494096	0.196855	0.506681	0.506824	0.491948	0.382289	0.576415	0.388064
137	Without_Outliers	1	cf_eco_agricultural_soil	MPNN_GE_S	1.44482	0.461848		0.383516	0.0862565	0.222369	0.333396	0.138752	0.210856	0.176743	0.350658	-5.48406	0.534035
137	Without_Outliers	2	cf_eco_lower_stratosphere_and_upper_troposphere	RF (GROVER)	1.67262	0.390381		0.335127	0.302869	0.231919	0.107263	0.159152	0.30099	-0.274236	0.339415	0.334278	0.380818
137	Without_Outliers	1	cf_hh_total_agricultural_soil	MPNN_GE_S	1.26678	0.430537	0.677385	0.0187282	0.685286	0.221905	0.252584	0.484867	0.380439	0.259593	0.0498903	-3.83158	0.433488
137	Without_Outliers	2	cf_hh_total_lower_stratosphere_and_upper_troposphere	RF (GROVER)	1.09461	0.416583	0.691284	0.411995	0.463007	0.243312	0.340248	0.436774	0.258113	0.352022	0.227201	0.285537	0.428409
138	Without_Outliers	1	cf_eco_air_indoor	RF	1.32267	0.483273		0.335108	0.350204	0.439159	0.659288	0.311946	0.196694	0.262515	0.466156	0.52453	0.357311
138	Without_Outliers	2	cf_eco_lower_stratosphere_and_upper_troposphere	XGB (GROVER)	1.59818	0.443439		0.389319	0.336827	0.334785	0.0190259	0.164888	0.327876	-0.393177	0.457223	0.471489	0.462096
138	Without_Outliers	1	cf_hh_total_air_indoor	RF	0.990143	0.315043	0.728703	0.293027	0.253488	0.257579	0.355088	-0.0240536	0.20501	0.242996	0.544628	0.001704	0.303995
138	Without_Outliers	2	cf_hh_total_lower_stratosphere_and_upper_troposphere	XGB (GROVER)	1.05677	0.456224	0.739792	0.398874	0.49697	0.333891	0.352863	0.472316	0.32604	0.458616	0.282818	0.249817	0.476207
139	Without_Outliers	1	cf_eco_air_indoor	XGB	1.26243	0.529263		0.362684	0.377416	0.521867	0.733923	0.364773	0.210764	0.382705	0.497558	0.329195	0.485482
139	Without_Outliers	2	cf_eco_lower_stratosphere_and_upper_troposphere	GP (GROVER)	1.61251	0.433412		0.388475	0.318444	0.280571	0.153444	0.17783	0.314418	-0.255152	0.454033	0.506024	0.482397	1.59352
139	Without_Outliers	1	cf_hh_total_air_indoor	XGB	0.964623	0.349897	0.713245	0.361443	0.390241	0.351351	0.390007	-0.128107	0.212795	0.325407	0.604419	-1.15673	0.37502
139	Without_Outliers	2	cf_hh_total_lower_stratosphere_and_upper_troposphere	GP (GROVER)	1.05802	0.454936	0.739792	0.449585	0.442192	0.370694	0.313558	0.512395	0.163576	0.371095	0.265085	0.297189	0.456547	1.01925
140	Without_Outliers	1	cf_eco_air_indoor	GP	1.3252	0.48129		0.232243	0.320692	0.428478	0.696256	0.359996	0.24958	0.257162	0.393757	-0.285507	0.430101	1.36848
140	Without_Outliers	2	cf_eco_lower_stratosphere_and_upper_troposphere	DeepMPT_S (GROVER)	0.752725	0.463765		0.40753	0.548017	0.413962	0.458722	0.581252	0.694485	0.194112	0.371752	0.370217	0.452562
140	Without_Outliers	1	cf_hh_total_air_indoor	GP	0.974427	0.336614	0.713245	0.261027	0.303844	0.202772	0.405818	-0.245557	0.195923	0.314464	0.597268	-0.43007	0.414423	0.960804
140	Without_Outliers	2	cf_hh_total_lower_stratosphere_and_upper_troposphere	DeepMPT_S (GROVER)	0.842406	0.336726	0.602665	0.510034	-0.016283	0.536993	0.174842	0.391404	0.463931	0.338024	0.361211	0.346235	0.0674335
141	Without_Outliers	1	cf_eco_air_indoor	DeepMPT_S	0.743216	0.372167		0.664376	0.204025	0.588968	0.160533	0.218077	0.55291	0.274805	0.47075	0.272277	0.468452
141	Without_Outliers	2	cf_eco_non-agricultural_soil	RF (GROVER)	1.52492	0.382054		0.211087	0.451494	0.282064	0.0841716	0.163941	0.141191	0.069628	0.190289	0.0894982	0.14585
141	Without_Outliers	1	cf_hh_total_air_indoor	DeepMPT_S	0.799886	0.351908	0.645177	0.424217	-0.716981	0.464769	0.285818	0.462536	0.0778856	0.199777	0.583126	0.695008	0.590646
141	Without_Outliers	2	cf_hh_total_non-agricultural_soil	RF (GROVER)	1.42493	0.413888	0.691284	0.257367	0.535055	0.381451	0.345864	0.420796	-0.340833	-0.66073	0.252747	0.224272	0.286132
142	Without_Outliers	1	cf_eco_air_indoor	MPNN_GO_S	1.11425	0.614053		0.543885	0.515706	0.330018	0.65865	0.571824	0.239112	0.420217	0.411228	-3.53245	0.24962
142	Without_Outliers	2	cf_eco_non-agricultural_soil	XGB (GROVER)	1.46305	0.43118		0.232942	0.47809	0.320749	0.302568	0.2455	0.156034	0.109586	0.268866	0.3351	0.178641
142	Without_Outliers	1	cf_hh_total_air_indoor	MPNN_GO_S	0.984275	0.414234	0.655077	0.124986	0.456244	0.398267	0.349593	0.168823	0.208548	0.143753	0.487123	0.812146	0.14765
142	Without_Outliers	2	cf_hh_total_non-agricultural_soil	XGB (GROVER)	1.3562	0.469065	0.739792	0.418404	0.508825	0.457883	0.515105	0.499301	-0.343338	-0.810129	0.299526	0.083406	0.345012
143	Without_Outliers	1	cf_eco_air_indoor	MPNN_GE_S	1.16145	0.58066		0.623188	0.523129	0.264089	0.591501	0.35187	0.177159	0.368427	0.389063	-7.44609	0.270692
143	Without_Outliers	2	cf_eco_non-agricultural_soil	GP (GROVER)	1.45315	0.438853		0.199085	0.481767	0.321487	0.347991	0.27496	0.255772	0.044869	0.304642	0.386761	0.15106	1.6703
143	Without_Outliers	1	cf_hh_total_air_indoor	MPNN_GE_S	0.945043	0.46	0.677846	0.275071	0.413022	-0.0510032	0.419259	0.310544	0.306738	0.182596	0.630656	0.717822	0.128938
143	Without_Outliers	2	cf_hh_total_non-agricultural_soil	GP (GROVER)	1.3918	0.440824	0.739792	0.339945	0.410048	0.428103	0.567375	0.457267	-0.565448	-0.887476	0.3261	0.132363	0.353951	1.48436
144	Without_Outliers	1	cf_eco_air_unspecified	RF	1.39294	0.489981		0.406624	0.222618	0.324542	0.609155	0.424949	0.181579	0.297409	0.298079	0.274548	0.333706
144	Without_Outliers	2	cf_eco_non-agricultural_soil	DeepMPT_S (GROVER)	0.793957	0.401601		0.162718	0.473635	0.329968	0.527277	0.452081	0.604186	-14.3412	0.390909	0.074248	0.395573
144	Without_Outliers	1	cf_hh_total_air_unspecified	RF	1.0037	0.357046	0.728703	0.369116	0.349277	0.348252	0.411592	0.0519645	0.228542	0.295805	0.484508	0.0354882	0.298732
144	Without_Outliers	2	cf_hh_total_non-agricultural_soil	DeepMPT_S (GROVER)	0.781513	0.315081	0.622954	-0.213104	0.19568	0.463175	0.62525	0.3383	0.27335	0.62593	0.41873	0.366817	0.358063
145	Without_Outliers	1	cf_eco_air_unspecified	XGB	1.38687	0.494419		0.366088	0.208985	0.408169	0.686835	0.450825	0.206957	0.335745	0.382495	0.441335	0.242905
145	Without_Outliers	2	cf_eco_non-urban_air_or_from_high_stacks	RF (GROVER)	1.57465	0.429893		0.324164	0.548535	0.235606	-0.0638942	0.145058	0.273821	0.0292511	0.216337	0.24894	0.353881
145	Without_Outliers	1	cf_hh_total_air_unspecified	XGB	0.951134	0.42263	0.713245	0.48446	0.48265	0.471838	0.421329	-0.00209494	0.277201	0.439847	0.549702	-0.115269	0.381573
145	Without_Outliers	2	cf_hh_total_non-urban_air_or_from_high_stacks	RF (GROVER)	1.09583	0.415288	0.691284	0.405132	0.457946	0.256191	0.298964	0.418237	0.271354	0.355588	0.228306	0.298156	0.421831
146	Without_Outliers	1	cf_eco_air_unspecified	GP	1.40071	0.484276		0.401866	0.23064	0.332412	0.585578	0.452617	0.134436	0.241862	0.338218	0.203612	0.351481	1.33722
146	Without_Outliers	2	cf_eco_non-urban_air_or_from_high_stacks	XGB (GROVER)	1.51082	0.475175		0.360097	0.606616	0.275478	0.0228074	0.0891286	0.314824	-0.278636	0.278021	0.433561	0.434548
146	Without_Outliers	1	cf_hh_total_air_unspecified	GP	0.98843	0.376462	0.713245	0.215374	0.404338	0.334698	0.467188	-0.0240269	0.203776	0.343726	0.554112	-0.373643	0.429309	0.955096
146	Without_Outliers	2	cf_hh_total_non-urban_air_or_from_high_stacks	XGB (GROVER)	1.0561	0.456918	0.739792	0.42196	0.49378	0.318562	0.347861	0.466934	0.331538	0.458307	0.292762	0.224899	0.494563
147	Without_Outliers	1	cf_eco_air_unspecified	DeepMPT_S	0.753193	0.394121		0.13338	0.131354	0.546638	0.678266	0.245792	0.344021	0.401379	0.157485	0.00563639	0.399645
147	Without_Outliers	2	cf_eco_non-urban_air_or_from_high_stacks	GP (GROVER)	1.53852	0.455751		0.29261	0.573206	0.208216	0.108238	0.160425	0.372465	-0.31658	0.27227	0.422381	0.441758	1.63765
147	Without_Outliers	1	cf_hh_total_air_unspecified	DeepMPT_S	0.795592	0.372905	0.614693	0.387225	0.131744	0.35421	0.293645	0.519776	-0.00576687	0.220223	0.300334	0.525688	0.560282
147	Without_Outliers	2	cf_hh_total_non-urban_air_or_from_high_stacks	GP (GROVER)	1.05948	0.453429	0.739792	0.449869	0.430599	0.371142	0.312108	0.511182	0.162913	0.37047	0.265228	0.298269	0.454836	1.01989
148	Without_Outliers	1	cf_eco_air_unspecified	MPNN_GO_S	1.25713	0.548224		0.464626	0.595719	0.4598	0.683271	0.45746	0.210668	0.197524	-0.385968	-2.86148	0.265729
148	Without_Outliers	2	cf_eco_non-urban_air_or_from_high_stacks	DeepMPT_S (GROVER)	0.749463	0.464801		0.388085	0.545462	0.370635	0.432194	0.636945	0.700752	0.212807	0.381067	0.355429	0.447118
148	Without_Outliers	1	cf_hh_total_air_unspecified	MPNN_GO_S	1.0328	0.408606	0.654769	-0.0367105	0.413346	0.498776	0.346978	0.296719	0.414466	0.140647	0.0586586	-0.710191	0.145277
148	Without_Outliers	2	cf_hh_total_non-urban_air_or_from_high_stacks	DeepMPT_S (GROVER)	0.841198	0.337966	0.608499	0.516364	0.00750721	0.512459	0.154079	0.396335	0.409456	0.180141	0.355313	0.322718	0.124866
149	Without_Outliers	1	cf_eco_air_unspecified	MPNN_GE_S	1.24424	0.55744		0.511419	0.668308	0.366017	0.667671	0.419871	0.152598	0.26341	-0.447008	-0.428115	0.393593
149	Without_Outliers	2	cf_eco_sea_water	RF (GROVER)	2.99226	0.481818		0.409567	0.407788	0.486312	0.585544	0.449059	0.358377	-0.794594	0.373654	-0.0618732	0.358678
149	Without_Outliers	1	cf_hh_total_air_unspecified	MPNN_GE_S	0.98008	0.467444	0.678462	0.0933655	0.596996	0.0913771	0.370151	0.385312	0.426736	0.29591	0.44574	-1.97438	0.197191
149	Without_Outliers	2	cf_hh_total_sea_water	RF (GROVER)	1.49597	0.447527	0.691284	0.269607	0.498151	0.299906	0.403733	0.536336	0.366239	-0.0710843	0.399605	0.434369	0.321224
150	Without_Outliers	1	cf_eco_fresh_water	RF	1.27127	0.437476		0.400399	0.265911	0.33594	0.554633	0.329601	0.255374	0.248608	0.375892	0.321123	0.173427
150	Without_Outliers	2	cf_eco_sea_water	XGB (GROVER)	2.76483	0.557593		0.49728	0.481422	0.564306	0.613596	0.528263	0.351522	-0.277653	0.484815	0.324873	0.433938
150	Without_Outliers	1	cf_hh_total_fresh_water	RF	1.10921	0.426111	0.728703	0.423268	0.316668	0.395533	0.405127	0.173082	0.36156	0.452742	0.178136	-0.163765	0.412006
150	Without_Outliers	2	cf_hh_total_sea_water	XGB (GROVER)	1.35558	0.546359	0.739792	0.394845	0.597509	0.420091	0.569321	0.496169	0.569393	0.0457486	0.501448	0.628152	0.402998
151	Without_Outliers	1	cf_eco_fresh_water	XGB	1.27982	0.429877		0.383142	0.133939	0.371762	0.666214	0.453043	0.277563	0.173313	0.554249	0.0181641	-0.0868283
151	Without_Outliers	2	cf_eco_sea_water	GP (GROVER)	2.82282	0.538839		0.427566	0.418096	0.5338	0.693313	0.555015	0.414455	-0.618012	0.491319	0.440773	0.402241	2.85809
151	Without_Outliers	1	cf_hh_total_fresh_water	XGB	1.04705	0.488631	0.713245	0.652949	0.407391	0.502464	0.467307	0.111445	0.410779	0.569498	0.345647	-0.961653	0.304681
151	Without_Outliers	2	cf_hh_total_sea_water	GP (GROVER)	1.44998	0.480976	0.739792	0.349869	0.331656	0.354434	0.486474	0.466166	0.420022	0.108039	0.503608	0.646351	0.460455	1.67807
152	Without_Outliers	1	cf_eco_fresh_water	GP	1.25845	0.448763		0.45125	-0.0107996	0.368681	0.533265	0.3932	0.328715	0.211931	0.474127	0.0650378	0.125068	1.18575
152	Without_Outliers	2	cf_eco_sea_water	DeepMPT_S (GROVER)	0.691739	0.543403		0.43495	0.548819	0.613098	0.226681	0.426728	0.746276	0.938157	0.607412	-0.0851821	0.578921
152	Without_Outliers	1	cf_hh_total_fresh_water	GP	1.08087	0.455063	0.713245	0.419075	0.364383	0.482696	0.418155	0.215302	0.351979	0.558986	0.225107	-0.719524	0.411723	1.03355
152	Without_Outliers	2	cf_hh_total_sea_water	DeepMPT_S (GROVER)	0.733305	0.375154	0.615987	0.242175	0.349365	0.584831	0.0367994	-0.171009	0.4673	-0.647204	0.331334	0.50242	0.503019
153	Without_Outliers	1	cf_eco_fresh_water	DeepMPT_S	0.831689	0.2974		0.0179647	0.276055	0.271306	0.523084	0.457425	-0.228296	0.273504	0.263182	-1.36267	0.45942
153	Without_Outliers	2	cf_eco_soil_unspecified	RF (GROVER)	1.52379	0.383681		0.215642	0.437746	0.289655	0.102486	0.195452	0.146291	0.0498728	0.207129	0.0671732	0.122867
153	Without_Outliers	1	cf_hh_total_fresh_water	DeepMPT_S	0.812244	0.393071	0.605864	0.38494	0.502577	0.266333	0.287701	0.550979	0.25243	0.330302	-0.086769	0.781347	0.280508
153	Without_Outliers	2	cf_hh_total_soil_unspecified	RF (GROVER)	1.28565	0.372231	0.691284	0.237495	0.393983	0.332268	0.356675	0.509896	-0.264926	-0.400191	0.271941	0.204053	0.260714
154	Without_Outliers	1	cf_eco_fresh_water	MPNN_GO_S	1.13794	0.499093		0.322286	0.54673	0.586556	0.650901	0.142911	0.294229	0.26884	0.586461	-201.702	0.229884
154	Without_Outliers	2	cf_eco_soil_unspecified	XGB (GROVER)	1.45869	0.435219		0.239808	0.486523	0.309591	0.298575	0.254453	0.140631	0.0664139	0.301492	0.319821	0.192073
154	Without_Outliers	1	cf_hh_total_fresh_water	MPNN_GO_S	1.12165	0.505098	0.653385	0.11939	0.80973	0.439832	0.298343	0.711174	0.554282	0.108006	-0.0128795	0.219263	0.0992666
154	Without_Outliers	2	cf_hh_total_soil_unspecified	XGB (GROVER)	1.23652	0.419294	0.739792	0.276639	0.374558	0.420244	0.542148	0.553055	-0.288075	-0.437288	0.294014	0.128116	0.311662
155	Without_Outliers	1	cf_eco_fresh_water	MPNN_GE_S	1.0513	0.572471		0.601092	0.635881	0.328837	0.660656	0.198698	0.355162	0.337422	0.289866	-626.247	0.383597
155	Without_Outliers	2	cf_eco_soil_unspecified	GP (GROVER)	1.45683	0.436655		0.197747	0.477746	0.317058	0.347915	0.276567	0.25316	0.0304974	0.304329	0.381645	0.148999	1.67039
155	Without_Outliers	1	cf_hh_total_fresh_water	MPNN_GE_S	1.0408	0.573872	0.678462	0.277014	0.763086	-0.117183	0.397281	0.662251	0.627633	0.22092	0.255056	-2.90455	0.374182
155	Without_Outliers	2	cf_hh_total_soil_unspecified	GP (GROVER)	1.25061	0.405988	0.739792	0.202981	0.351014	0.389397	0.594679	0.516116	-0.588027	-0.677235	0.314697	0.235102	0.345502	1.29281
156	Without_Outliers	1	cf_eco_lower_stratosphere_and_upper_troposphere	RF	1.43389	0.461768		0.366012	0.312763	0.298371	0.535982	0.375944	0.125381	0.271175	0.267548	-0.371734	0.17123
156	Without_Outliers	2	cf_eco_soil_unspecified	DeepMPT_S (GROVER)	0.800592	0.392738		0.146482	0.468256	0.317374	0.509111	0.456892	0.604122	-12.7557	0.387363	0.0287567	0.384029
156	Without_Outliers	1	cf_hh_total_lower_stratosphere_and_upper_troposphere	RF	1.08408	0.423131	0.728703	0.34058	0.41626	0.397321	0.465416	0.267287	0.27151	0.382088	0.395273	-0.0925049	0.258989
156	Without_Outliers	2	cf_hh_total_soil_unspecified	DeepMPT_S (GROVER)	0.818502	0.29853	0.612766	0.111951	0.0764471	0.430549	0.153554	0.439748	0.473194	0.745091	0.360157	0.464022	0.336337
157	Without_Outliers	1	cf_eco_lower_stratosphere_and_upper_troposphere	XGB	1.38212	0.499933		0.376827	0.30778	0.486906	0.643007	0.440675	0.106751	0.335933	0.445784	0.139081	0.0630816
157	Without_Outliers	2	cf_eco_urban_air_close_to_ground	RF (GROVER)	1.49409	0.428992		0.337461	0.55269	0.221986	-0.0470483	0.238192	0.258193	-0.184925	0.26325	0.261765	0.34103
157	Without_Outliers	1	cf_hh_total_lower_stratosphere_and_upper_troposphere	XGB	1.04118	0.467882	0.713245	0.393747	0.553365	0.494703	0.546848	0.22619	0.292698	0.457882	0.47893	-0.194835	0.236988
157	Without_Outliers	2	cf_hh_total_urban_air_close_to_ground	RF (GROVER)	0.94444	0.36992	0.691284	0.300593	0.442806	0.223464	0.280999	0.39505	0.137314	0.336115	0.215676	0.256117	0.319435
158	Without_Outliers	1	cf_eco_lower_stratosphere_and_upper_troposphere	GP	1.45167	0.448339		0.286449	0.27629	0.492483	0.498721	0.465292	0.13123	0.257271	0.321571	-0.377633	0.042313	1.40891
158	Without_Outliers	2	cf_eco_urban_air_close_to_ground	XGB (GROVER)	1.42239	0.482481		0.413049	0.590801	0.298771	0.124452	0.0806109	0.351291	-0.0678404	0.333839	0.46344	0.412464
158	Without_Outliers	1	cf_hh_total_lower_stratosphere_and_upper_troposphere	GP	1.06551	0.442723	0.713245	0.118319	0.475604	0.40249	0.521904	0.264021	0.270106	0.414803	0.485571	-0.269757	0.369822	1.02813
158	Without_Outliers	2	cf_hh_total_urban_air_close_to_ground	XGB (GROVER)	0.917322	0.405584	0.739792	0.328149	0.521329	0.26883	0.309039	0.430756	0.157184	0.431933	0.25071	0.252	0.35265
159	Without_Outliers	1	cf_eco_lower_stratosphere_and_upper_troposphere	DeepMPT_S	0.77102	0.41445		0.185401	0.429702	0.270223	0.468501	0.545959	0.508831	0.172137	0.60834	0.247634	0.591042
159	Without_Outliers	2	cf_eco_urban_air_close_to_ground	GP (GROVER)	1.4595	0.455126		0.343107	0.54263	0.22386	0.181871	0.189763	0.397803	-0.256087	0.303037	0.476489	0.416475	1.57953
159	Without_Outliers	1	cf_hh_total_lower_stratosphere_and_upper_troposphere	DeepMPT_S	0.71808	0.495516	0.672331	0.52965	0.588757	0.359133	0.498945	0.621196	0.299571	0.193874	0.504744	0.909377	0.592974
159	Without_Outliers	2	cf_hh_total_urban_air_close_to_ground	GP (GROVER)	0.916046	0.407237	0.739792	0.340627	0.469653	0.318796	0.216154	0.480131	0.033292	0.382749	0.249857	0.390924	0.284939	0.937796
160	Without_Outliers	1	cf_eco_lower_stratosphere_and_upper_troposphere	MPNN_GO_S	1.49331	0.495954		0.348659	0.401084	0.360832	0.497056	0.586691	0.225738	0.35147	0.292654	-0.106127	0.368034
160	Without_Outliers	2	cf_eco_urban_air_close_to_ground	DeepMPT_S (GROVER)	0.746356	0.477477		0.431479	0.571847	0.375226	0.482937	0.621293	0.782378	0.210868	0.376957	0.379907	0.440822
160	Without_Outliers	1	cf_hh_total_lower_stratosphere_and_upper_troposphere	MPNN_GO_S	1.12207	0.453596	0.652923	-0.192352	0.610483	0.438789	0.367017	0.424227	0.45398	0.157462	0.324398	-0.786446	0.15126
160	Without_Outliers	2	cf_hh_total_urban_air_close_to_ground	DeepMPT_S (GROVER)	0.836827	0.291779	0.613027	0.429318	0.0560816	0.433564	-0.0172266	0.463352	0.532163	-6.81721	0.39479	0.325949	0.0920123
161	Without_Outliers	1	cf_eco_lower_stratosphere_and_upper_troposphere	MPNN_GE_S	1.48088	0.504313		0.516185	-0.0304962	0.294687	0.575051	0.582086	0.175713	0.183053	0.333589	0.305639	0.347948
161	Without_Outliers	2	cf_eco_water_unspecified	RF (GROVER)	1.48665	0.324971		0.254064	0.230716	0.35828	0.187818	-0.00645294	0.0288344	-0.155491	0.267206	-0.975773	0.280558
161	Without_Outliers	1	cf_hh_total_lower_stratosphere_and_upper_troposphere	MPNN_GE_S	1.09711	0.477633	0.678154	-0.182403	0.63269	0.195183	0.298457	0.615344	0.505026	0.306202	0.0973121	-9.72296	0.231771
161	Without_Outliers	2	cf_hh_total_water_unspecified	RF (GROVER)	1.18533	0.421808	0.691284	0.31021	0.514594	0.309776	0.437432	0.48649	0.241564	-0.410655	0.291122	0.346431	0.269415
162	Without_Outliers	1	cf_eco_non-agricultural_soil	RF	1.31204	0.466923		0.461316	0.229398	0.274271	0.36395	0.240473	0.298527	0.094932	0.332679	0.301315	0.280224
162	Without_Outliers	2	cf_eco_water_unspecified	XGB (GROVER)	1.41769	0.386138		0.303797	0.244054	0.450019	0.215348	0.0867922	0.0328182	-0.18838	0.373589	-0.241745	0.421634
162	Without_Outliers	1	cf_hh_total_non-agricultural_soil	RF	1.41597	0.351288	0.728703	0.244591	0.240383	0.361007	0.431018	0.189545	0.175549	0.348507	0.100533	0.100304	0.348219
162	Without_Outliers	2	cf_hh_total_water_unspecified	XGB (GROVER)	1.1216	0.482307	0.739792	0.397453	0.59305	0.387424	0.586415	0.486835	0.31879	-0.471363	0.357156	0.374172	0.293326
163	Without_Outliers	1	cf_eco_non-agricultural_soil	XGB	1.35307	0.433063		0.326174	-0.190546	0.418846	0.449281	0.284174	0.343885	0.122702	0.437874	0.173279	0.18837
163	Without_Outliers	2	cf_eco_water_unspecified	GP (GROVER)	1.4241	0.380581		0.251858	0.277597	0.380705	0.148601	0.0914317	0.128632	-0.30083	0.341161	-0.0145336	0.39626	1.408
163	Without_Outliers	1	cf_hh_total_non-agricultural_soil	XGB	1.38238	0.381694	0.713245	0.285009	0.267058	0.464609	0.501914	0.0932917	0.232731	0.492429	-0.0167087	0.0185065	0.312602
163	Without_Outliers	2	cf_hh_total_water_unspecified	GP (GROVER)	1.13644	0.468524	0.739792	0.397293	0.515702	0.389825	0.623006	0.447554	0.0675765	-0.659143	0.371885	0.388775	0.293256	1.12697
164	Without_Outliers	1	cf_eco_non-agricultural_soil	GP	1.35541	0.4311		0.438135	-0.0595394	0.314786	0.314339	0.266955	0.332808	-0.0119662	0.361067	0.519281	0.147099	1.42678
164	Without_Outliers	2	cf_eco_water_unspecified	DeepMPT_S (GROVER)	0.765668	0.440512		0.293062	0.449779	0.351349	0.506815	0.477931	0.832781	-0.682576	0.432634	0.209902	0.379733
164	Without_Outliers	1	cf_hh_total_non-agricultural_soil	GP	1.39208	0.372987	0.713245	0.100018	0.223396	0.325215	0.478373	0.301772	0.16947	0.471371	0.0782091	-0.0279887	0.411701	1.32191
164	Without_Outliers	2	cf_hh_total_water_unspecified	DeepMPT_S (GROVER)	0.785112	0.354918	0.611024	0.0521849	0.216024	0.479545	0.130189	0.471715	0.510502	0.347331	0.380631	0.559511	0.380475
165	Without_Outliers	1	cf_eco_non-agricultural_soil	DeepMPT_S	0.805278	0.281855		0.354468	-0.081569	0.0865181	-0.105243	0.494244	0.324469	0.0806991	0.430964	-5.28954	0.340286
165	Without_Outliers	1	cf_hh_total_non-agricultural_soil	DeepMPT_S	0.814143	0.35682	0.606363	0.361976	0.171337	0.448494	0.22483	0.387916	0.290303	0.325794	-0.580209	0.726184	0.555012
166	Without_Outliers	1	cf_eco_non-agricultural_soil	MPNN_GO_S	1.4147	0.514505		0.502497	0.277387	0.303095	0.394267	0.202583	0.308008	0.37754	0.106912	0.459701	-0.0432496
166	Without_Outliers	1	cf_hh_total_non-agricultural_soil	MPNN_GO_S	1.39055	0.412072	0.652923	0.171251	0.535584	0.64293	0.346008	0.422908	0.358315	0.27728	0.328226	-1.0113	0.281189
167	Without_Outliers	1	cf_eco_non-agricultural_soil	MPNN_GE_S	1.31163	0.58267		0.784247	0.566821	0.269194	0.488059	0.16894	0.251837	0.387603	0.15267	-0.12033	0.00539251
167	Without_Outliers	1	cf_hh_total_non-agricultural_soil	MPNN_GE_S	1.34541	0.449627	0.678462	0.19771	0.644354	0.444338	0.300401	0.391634	0.340944	0.310446	0.0435506	-5.89104	0.560578
168	Without_Outliers	1	cf_eco_non-urban_air_or_from_high_stacks	RF	1.44686	0.497046		0.474815	0.215993	0.340675	0.676452	0.474951	0.134828	0.310002	0.181958	0.355479	0.276979
168	Without_Outliers	1	cf_hh_total_non-urban_air_or_from_high_stacks	RF	1.08683	0.422933	0.728703	0.322043	0.41626	0.397321	0.465416	0.267287	0.27151	0.382088	0.395273	-0.0925049	0.258989
169	Without_Outliers	1	cf_eco_non-urban_air_or_from_high_stacks	XGB	1.39523	0.532298		0.503466	0.270155	0.425119	0.733597	0.534263	0.153151	0.370946	0.14949	0.536794	0.346602
169	Without_Outliers	1	cf_hh_total_non-urban_air_or_from_high_stacks	XGB	1.04411	0.467404	0.713245	0.371458	0.553365	0.494703	0.546848	0.22619	0.292698	0.457882	0.47893	-0.194835	0.236988
170	Without_Outliers	1	cf_eco_non-urban_air_or_from_high_stacks	GP	1.49703	0.46156		0.415981	0.196288	0.338057	0.603701	0.480111	0.157333	0.21966	-0.010523	0.234931	0.287498	1.43511
170	Without_Outliers	1	cf_hh_total_non-urban_air_or_from_high_stacks	GP	1.0687	0.442023	0.713245	0.103388	0.475604	0.40249	0.521904	0.264021	0.270106	0.414803	0.485571	-0.269757	0.369822	1.02813
171	Without_Outliers	1	cf_eco_non-urban_air_or_from_high_stacks	DeepMPT_S	0.756751	0.482489		0.385608	0.511287	0.494216	0.369727	0.554141	0.74927	0.276372	0.384039	0.28215	0.492836
171	Without_Outliers	1	cf_hh_total_non-urban_air_or_from_high_stacks	DeepMPT_S	0.74938	0.450069	0.626187	0.363356	0.37399	0.153543	0.45541	0.609218	0.275593	0.279721	0.254323	0.599815	0.598421
172	Without_Outliers	1	cf_eco_non-urban_air_or_from_high_stacks	MPNN_GO_S	1.50777	0.501707		0.333079	0.275408	0.185923	0.644612	0.300686	0.120876	0.363943	0.408926	-20426.7	0.170663
172	Without_Outliers	1	cf_hh_total_non-urban_air_or_from_high_stacks	MPNN_GO_S	1.11761	0.457935	0.654615	0.00354639	0.578284	0.380025	0.199299	0.512271	0.559121	0.193857	0.155747	0.422065	0.136526
173	Without_Outliers	1	cf_eco_non-urban_air_or_from_high_stacks	MPNN_GE_S	1.48913	0.513946		0.261202	0.345211	0.0369692	0.589785	0.31096	0.246183	0.406952	0.420478	-6985.55	0.35695
173	Without_Outliers	1	cf_hh_total_non-urban_air_or_from_high_stacks	MPNN_GE_S	1.07613	0.49742	0.678308	0.0453184	0.62042	0.215812	0.390881	0.555025	0.438205	0.328923	0.390052	-6.01504	0.220332
174	Without_Outliers	1	cf_eco_sea_water	RF	2.48589	0.617787		0.501503	0.443349	0.752366	0.49194	0.423895	0.578269	0.449775	0.135819	0.320528	0.491515
174	Without_Outliers	1	cf_hh_total_sea_water	RF	1.27602	0.527805	0.728703	0.396476	0.518275	0.366891	0.553581	0.515852	0.445806	0.51966	0.363338	-1.04925	0.428664
175	Without_Outliers	1	cf_eco_sea_water	XGB	2.41921	0.638017		0.475191	0.57547	0.776343	0.544547	0.520043	0.604811	0.474275	0.335698	0.241127	0.460214
175	Without_Outliers	1	cf_hh_total_sea_water	XGB	1.20589	0.578285	0.713245	0.510545	0.480229	0.488179	0.580622	0.477382	0.54945	0.615671	0.550131	-0.0284333	0.365383
176	Without_Outliers	1	cf_eco_sea_water	GP	2.48553	0.617897		0.431117	0.622985	0.737874	0.506328	0.49492	0.598827	0.392008	0.233196	-0.0720176	0.472939	2.41913
176	Without_Outliers	1	cf_hh_total_sea_water	GP	1.26915	0.532878	0.713245	0.416805	0.416041	0.447413	0.615304	0.521781	0.390453	0.587272	0.380912	-0.33057	0.375529	1.39399
177	Without_Outliers	1	cf_eco_sea_water	DeepMPT_S	0.673931	0.589655		0.480697	0.644244	0.741891	0.703233	0.634733	0.442797	0.694947	0.608836	0.133038	0.464258
177	Without_Outliers	1	cf_hh_total_sea_water	DeepMPT_S	0.718468	0.421388	0.619857	0.271843	0.787819	0.614032	0.455671	0.58438	0.237321	0.340223	-1.15471	0.840169	0.409743
178	Without_Outliers	1	cf_eco_sea_water	MPNN_GO_S	2.45757	0.567747		0.261435	0.656148	0.575475	0.729152	0.535825	0.496672	0.748099	0.232806	-0.149424	0.137695
178	Without_Outliers	1	cf_hh_total_sea_water	MPNN_GO_S	1.77969	0.396435	0.652154	-0.14219	0.788141	-1.31374	0.238485	0.60482	0.566208	0.282204	0.276557	0.140374	0.00940153
179	Without_Outliers	1	cf_eco_sea_water	MPNN_GE_S	2.44768	0.571218		0.467463	0.759197	0.510115	0.65639	0.513305	0.382442	0.761115	0.447482	-0.484679	0.361442
179	Without_Outliers	1	cf_hh_total_sea_water	MPNN_GE_S	1.6111	0.50537	0.678154	0.0396474	0.767275	-0.837732	0.559004	0.743429	0.629373	0.369322	0.285205	-2.87593	0.287914
180	Without_Outliers	1	cf_eco_soil_unspecified	RF	1.31439	0.465072		0.473563	0.188486	0.270928	0.36076	0.229964	0.301592	0.111767	0.336402	0.428247	0.245252
180	Without_Outliers	1	cf_hh_total_soil_unspecified	RF	1.29918	0.353788	0.728703	0.105413	0.245682	0.325427	0.442583	0.231127	0.176803	0.35704	0.152308	-0.127949	0.358219
181	Without_Outliers	1	cf_eco_soil_unspecified	XGB	1.34341	0.441187		0.30687	0.00427061	0.361791	0.445491	0.312669	0.358791	0.132585	0.45456	0.581617	0.167249
181	Without_Outliers	1	cf_hh_total_soil_unspecified	XGB	1.23307	0.417887	0.713245	0.167275	0.345329	0.482209	0.517653	0.115274	0.23719	0.543299	0.166076	-0.301771	0.402874
182	Without_Outliers	1	cf_eco_soil_unspecified	GP	1.35175	0.434225		0.441473	-0.0567718	0.308534	0.308741	0.260485	0.354708	-0.0077367	0.366907	0.518194	0.141219	1.42544
182	Without_Outliers	1	cf_hh_total_soil_unspecified	GP	1.24891	0.402831	0.713245	0.0267751	0.256607	0.31724	0.451418	0.306589	0.200605	0.499965	0.152687	-0.121668	0.479881	1.18894
183	Without_Outliers	1	cf_eco_soil_unspecified	DeepMPT_S	0.784884	0.318808		0.399266	-0.450472	0.147626	-0.0472087	0.486724	0.451653	0.242202	0.280162	-6.14038	0.266952
183	Without_Outliers	1	cf_hh_total_soil_unspecified	DeepMPT_S	0.797333	0.393983	0.672331	0.131346	0.310474	0.528299	0.192634	0.509007	0.310441	0.387258	-0.133298	0.774402	0.641906
184	Without_Outliers	1	cf_eco_soil_unspecified	MPNN_GO_S	1.39414	0.52854		0.536982	0.288126	0.264666	0.435475	0.181063	0.254914	0.419269	-0.061134	0.483698	0.138013
184	Without_Outliers	1	cf_hh_total_soil_unspecified	MPNN_GO_S	1.31353	0.38431	0.654615	0.142733	0.613833	0.37047	0.224283	0.460764	0.324449	0.239281	0.42034	-1.42201	0.216539
185	Without_Outliers	1	cf_eco_soil_unspecified	MPNN_GE_S	1.28801	0.597586		0.806125	0.562067	0.391498	0.474753	0.168572	0.273418	0.351726	0.195787	0.309459	0.0409381
185	Without_Outliers	1	cf_hh_total_soil_unspecified	MPNN_GE_S	1.26257	0.431155	0.677846	0.0483634	0.68479	0.291924	0.263335	0.459301	0.384748	0.295109	-0.0471791	-6.4515	0.441602
186	Without_Outliers	1	cf_eco_urban_air_close_to_ground	RF	1.38018	0.491579		0.424904	0.2443	0.358497	0.647642	0.480503	0.161631	0.346918	0.0883011	0.340204	0.297473
186	Without_Outliers	1	cf_hh_total_urban_air_close_to_ground	RF	0.994232	0.342328	0.728703	0.362303	0.343529	0.323511	0.409776	0.0431508	0.20851	0.274007	0.480458	0.0364254	0.30403
187	Without_Outliers	1	cf_eco_urban_air_close_to_ground	XGB	1.31145	0.540958		0.477836	0.320403	0.49381	0.68962	0.550229	0.235999	0.354376	0.146316	0.715913	0.340452
187	Without_Outliers	1	cf_hh_total_urban_air_close_to_ground	XGB	0.971957	0.371468	0.713245	0.356646	0.398834	0.325652	0.428345	-0.116345	0.23795	0.372602	0.542785	-0.0977204	0.354563
188	Without_Outliers	1	cf_eco_urban_air_close_to_ground	GP	1.40746	0.471285		0.341675	0.257612	0.347188	0.604534	0.493991	0.231464	0.231238	-0.0124988	0.257985	0.308192	1.36414
188	Without_Outliers	1	cf_hh_total_urban_air_close_to_ground	GP	0.981295	0.359332	0.713245	0.22483	0.390297	0.306718	0.452929	-0.0880019	0.187619	0.329021	0.56581	-0.395148	0.429182	0.950786
189	Without_Outliers	1	cf_eco_urban_air_close_to_ground	DeepMPT_S	0.76939	0.465561		0.273882	0.462125	0.519272	0.345517	0.530572	0.728107	0.309577	0.467753	0.231456	0.598169
189	Without_Outliers	1	cf_hh_total_urban_air_close_to_ground	DeepMPT_S	0.772936	0.404778	0.645177	0.573541	0.296283	0.314206	0.392994	0.468835	0.112207	0.199866	0.299599	0.797871	0.563859
190	Without_Outliers	1	cf_eco_urban_air_close_to_ground	MPNN_GO_S	1.41391	0.500435		0.28319	0.238881	0.26048	0.590232	0.388993	0.152504	0.317098	0.388378	-190584	0.253771
190	Without_Outliers	1	cf_hh_total_urban_air_close_to_ground	MPNN_GO_S	1.03706	0.381813	0.654615	-0.129346	0.500681	0.430704	0.313779	0.202315	0.277875	0.144467	0.262969	0.72552	0.130793
191	Without_Outliers	1	cf_eco_urban_air_close_to_ground	MPNN_GE_S	1.36288	0.535845		0.382869	0.390063	-0.0456244	0.599663	0.281815	0.267385	0.357828	0.354366	-89398.8	0.336082
191	Without_Outliers	1	cf_hh_total_urban_air_close_to_ground	MPNN_GE_S	0.973434	0.455346	0.678154	0.00563714	0.697511	0.130911	0.341469	0.40883	0.389166	0.30658	0.453383	-1.66516	0.148362
192	Without_Outliers	1	cf_eco_water_unspecified	RF	1.11601	0.498989		0.470316	0.399382	0.369851	0.514182	0.376309	0.327031	0.266858	0.349423	0.456974	0.396179
192	Without_Outliers	1	cf_hh_total_water_unspecified	RF	1.1163	0.418845	0.728703	0.396452	0.323471	0.342859	0.398375	0.191159	0.343905	0.454614	0.222874	-0.189608	0.395768
193	Without_Outliers	1	cf_eco_water_unspecified	XGB	1.12638	0.489633		0.433904	0.355919	0.495408	0.596209	0.427514	0.295214	0.234592	0.424984	0.374094	0.260918
193	Without_Outliers	1	cf_hh_total_water_unspecified	XGB	1.04951	0.486306	0.713245	0.656752	0.428923	0.463416	0.435176	0.0669322	0.449354	0.581714	0.327669	-0.50428	0.288715
194	Without_Outliers	1	cf_eco_water_unspecified	GP	1.14947	0.468502		0.420346	0.364423	0.423288	0.501923	0.418449	0.209033	0.192973	0.415158	0.269318	0.347709	1.21938
194	Without_Outliers	1	cf_hh_total_water_unspecified	GP	1.08417	0.45182	0.713245	0.40178	0.370265	0.483763	0.422464	0.224904	0.341486	0.56176	0.236799	-0.65629	0.398027	1.03376
195	Without_Outliers	1	cf_eco_water_unspecified	DeepMPT_S	0.704177	0.507564		0.30697	0.116056	0.696461	0.601913	0.443661	0.605707	0.312898	0.667393	0.2031	0.619125
195	Without_Outliers	1	cf_hh_total_water_unspecified	DeepMPT_S	0.845181	0.344936	0.614693	0.543783	0.315162	0.355936	0.139189	0.547719	0.190928	0.201258	0.0270583	0.768754	0.218078
196	Without_Outliers	1	cf_eco_water_unspecified	MPNN_GO_S	1.16091	0.46388		0.299188	0.276758	0.628636	0.622727	-0.165137	0.163128	0.57132	0.527041	0.755023	0.0648248
196	Without_Outliers	1	cf_hh_total_water_unspecified	MPNN_GO_S	1.14087	0.492671	0.654154	-0.0120218	0.775509	0.458746	0.248142	0.706484	0.5485	0.109026	-0.217092	0.480405	0.176174
197	Without_Outliers	1	cf_eco_water_unspecified	MPNN_GE_S	1.19021	0.436476		0.0794387	0.451798	0.635333	0.682175	0.221523	0.205611	0.418106	0.410959	0.610445	0.105136
197	Without_Outliers	1	cf_hh_total_water_unspecified	MPNN_GE_S	1.03576	0.581847	0.678	0.245473	0.75813	0.0123014	0.410936	0.690735	0.645663	0.263018	0.153321	-6.02064	0.387547
198	Without_Outliers	2	cf_eco_agricultural_soil	DeepMPT_M	0.81161	0.226214		0.347426	0.415361	-0.096036	0.149122	0.243881	0.0994411	0.437889	0.123458	-8.38802	-0.938481
198	Without_Outliers	2	cf_hh_total_agricultural_soil	DeepMPT_M	0.79362	0.342474	0.57209	0.124301	0.380408	0.362333	0.142977	0.406949	0.318836	0.469928	0.0847815	0.713708	0.418026
199	Without_Outliers	2	cf_eco_air_indoor	DeepMPT_M	0.719683	0.418208		0.625678	0.554563	0.0700506	0.196412	0.436307	0.482426	0.40016	0.458022	-0.970822	0.0859174
199	Without_Outliers	2	cf_hh_total_air_indoor	DeepMPT_M	0.792358	0.333389	0.555291	0.289481	0.668081	0.435511	0.132118	0.219053	0.349136	0.32083	0.466704	0.635008	0.486389
200	Without_Outliers	2	cf_eco_air_unspecified	DeepMPT_M	0.728136	0.400787		0.615291	0.593199	-0.0582675	0.140971	0.439013	0.4424	0.421176	0.40676	-1.26855	0.0439441
200	Without_Outliers	2	cf_hh_total_air_unspecified	DeepMPT_M	0.758793	0.385313	0.610053	0.280053	0.692803	0.496049	0.246232	0.316342	0.24255	0.414345	0.360247	0.608408	0.556028
201	Without_Outliers	2	cf_eco_fresh_water	DeepMPT_M	0.765209	0.32974		0.497643	0.667998	-0.0524815	0.178714	0.340381	0.363257	0.363288	-0.0718096	-2.52029	-0.0397555
201	Without_Outliers	2	cf_hh_total_fresh_water	DeepMPT_M	0.728144	0.445458	0.593254	0.438596	0.554965	0.37305	0.441673	0.567673	0.503842	0.245293	0.413725	0.660324	0.538529
202	Without_Outliers	2	cf_eco_lower_stratosphere_and_upper_troposphere	DeepMPT_M	0.746832	0.37919		0.604308	0.518786	-0.0394485	0.0946042	0.363343	0.432783	0.404097	0.442315	-1.48609	0.169788
202	Without_Outliers	2	cf_hh_total_lower_stratosphere_and_upper_troposphere	DeepMPT_M	0.744949	0.441	0.572884	0.296803	0.570448	0.547235	0.413018	0.394522	0.208307	0.425436	0.280819	0.669066	0.646422
203	Without_Outliers	2	cf_eco_non-agricultural_soil	DeepMPT_M	0.822692	0.201253		0.328362	0.426425	-0.148643	0.122705	0.223841	0.0548557	0.428017	0.0943712	-9.93227	-1.01776
203	Without_Outliers	2	cf_hh_total_non-agricultural_soil	DeepMPT_M	0.785121	0.345347	0.621032	0.0033704	0.347679	0.387601	0.114987	0.377812	0.385031	0.529648	-0.0629781	0.246144	0.427265
204	Without_Outliers	2	cf_eco_non-urban_air_or_from_high_stacks	DeepMPT_M	0.741294	0.384899		0.586309	0.611521	-0.0711683	0.0751408	0.382764	0.411997	0.424058	0.452105	-1.42671	0.155108
204	Without_Outliers	2	cf_hh_total_non-urban_air_or_from_high_stacks	DeepMPT_M	0.749605	0.433492	0.56164	0.298261	0.57421	0.543362	0.404176	0.373087	0.192377	0.42823	0.271163	0.665216	0.632107
205	Without_Outliers	2	cf_eco_sea_water	DeepMPT_M	0.653845	0.524841		0.567221	0.369041	0.217132	0.4848	0.575527	0.527251	0.632314	0.386533	-9.20894	0.148071
205	Without_Outliers	2	cf_hh_total_sea_water	DeepMPT_M	0.679587	0.501335	0.614683	0.572567	0.523912	0.543209	0.403979	0.655344	0.561844	0.220969	0.523946	0.245296	0.64646
206	Without_Outliers	2	cf_eco_soil_unspecified	DeepMPT_M	0.815885	0.214243		0.344375	0.41086	-0.13685	0.129213	0.237558	0.0649127	0.436488	0.124066	-8.35077	-0.942006
206	Without_Outliers	2	cf_hh_total_soil_unspecified	DeepMPT_M	0.796545	0.332647	0.60873	0.103546	0.396335	0.358404	0.111075	0.384955	0.314261	0.471218	0.0611409	0.642099	0.430181
207	Without_Outliers	2	cf_eco_urban_air_close_to_ground	DeepMPT_M	0.709423	0.432013		0.60817	0.621217	0.0461774	0.197912	0.465722	0.485272	0.439472	0.445069	-0.796868	0.0808796
207	Without_Outliers	2	cf_hh_total_urban_air_close_to_ground	DeepMPT_M	0.768841	0.362725	0.616799	0.259211	0.705288	0.471108	0.189014	0.291794	0.270788	0.381068	0.369242	0.615633	0.543191
208	Without_Outliers	2	cf_eco_water_unspecified	DeepMPT_M	0.756875	0.344301		0.504643	0.62995	-0.0759902	0.222642	0.36475	0.388505	0.367833	-0.0977919	-2.68632	0.0448478
208	Without_Outliers	2	cf_hh_total_water_unspecified	DeepMPT_M	0.728735	0.445556	0.618783	0.399304	0.529876	0.352241	0.421454	0.582903	0.49897	0.270916	0.385717	0.675784	0.59061
209	Without_Outliers	2	cf_eco_agricultural_soil	MPNN_GO_M	1.68475	0.374336		0.265789	0.135942	-0.162362	0.414043	0.376269	0.148286	0.300553	0.10031	0.254416	-0.00110703
209	Without_Outliers	2	cf_hh_total_agricultural_soil	MPNN_GO_M	1.18994	0.377526	0.812555	0.285379	-0.22975	-0.46275	0.189137	0.259212	-0.0452154	-0.0501849	0.34602	0.711536	0.762034
210	Without_Outliers	2	cf_eco_air_indoor	MPNN_GO_M	1.59644	0.41786		0.180762	0.208003	0.0476407	0.51883	0.481996	0.270202	0.480572	0.388425	0.400626	0.0672666
210	Without_Outliers	2	cf_hh_total_air_indoor	MPNN_GO_M	0.889353	0.386803	0.813213	0.319011	-0.598131	0.483003	0.339164	0.14925	-0.262265	0.213186	0.577578	0.498514	0.629508
211	Without_Outliers	2	cf_eco_air_unspecified	MPNN_GO_M	1.61549	0.41247		0.179966	0.154234	0.0388765	0.515766	0.471503	0.266332	0.480094	0.350109	0.414544	0.0833261
211	Without_Outliers	2	cf_hh_total_air_unspecified	MPNN_GO_M	0.874073	0.407467	0.813872	0.399891	-0.499116	0.410734	0.188973	0.31625	-0.217387	0.195964	0.601606	0.740823	0.658912
212	Without_Outliers	2	cf_eco_fresh_water	MPNN_GO_M	1.48107	0.340189		0.164181	0.154923	-0.13077	0.49275	0.352844	0.281943	0.34693	0.108277	0.430182	0.177903
212	Without_Outliers	2	cf_hh_total_fresh_water	MPNN_GO_M	1.02702	0.425808	0.812774	0.441012	-0.328849	0.090842	0.00494164	0.374338	0.162362	0.0387903	0.468622	0.539996	0.750373
213	Without_Outliers	2	cf_eco_lower_stratosphere_and_upper_troposphere	MPNN_GO_M	1.66364	0.416472		0.182516	0.214459	0.0184725	0.504588	0.463285	0.257289	0.459259	0.385245	0.397767	0.053516
213	Without_Outliers	2	cf_hh_total_lower_stratosphere_and_upper_troposphere	MPNN_GO_M	0.958665	0.463564	0.812774	0.355886	-0.259739	0.307497	0.0825167	0.410611	-0.0249612	0.200123	0.632568	0.697826	0.621545
214	Without_Outliers	2	cf_eco_non-agricultural_soil	MPNN_GO_M	1.68732	0.373978		0.278412	0.131283	-0.161727	0.412211	0.380986	0.148441	0.298974	0.0700986	0.249952	0.00389016
214	Without_Outliers	2	cf_hh_total_non-agricultural_soil	MPNN_GO_M	1.4079	0.356642	0.813872	0.156337	-0.242337	-0.520273	0.0979693	0.25349	0.105185	-0.10425	0.332724	0.71348	0.801096
215	Without_Outliers	2	cf_eco_non-urban_air_or_from_high_stacks	MPNN_GO_M	1.66358	0.415635		0.20357	0.148435	0.00778743	0.506244	0.457987	0.252845	0.453349	0.357494	0.406801	0.0711715
215	Without_Outliers	2	cf_hh_total_non-urban_air_or_from_high_stacks	MPNN_GO_M	0.95979	0.462305	0.813982	0.339106	-0.23959	0.338055	0.0664695	0.410396	-0.0133876	0.197787	0.621132	0.690611	0.625943
216	Without_Outliers	2	cf_eco_sea_water	MPNN_GO_M	2.72642	0.502201		0.25865	0.342788	0.681275	0.353355	0.607422	0.374585	0.505685	0.0106609	0.352789	0.422384
216	Without_Outliers	2	cf_hh_total_sea_water	MPNN_GO_M	1.26235	0.496303	0.812555	0.43704	0.13378	0.640411	0.450181	0.583477	0.165789	0.0789708	0.411177	0.324601	0.62672
217	Without_Outliers	2	cf_eco_soil_unspecified	MPNN_GO_M	1.68661	0.375206		0.273131	0.133049	-0.165853	0.412704	0.378101	0.147093	0.304376	0.0764466	0.262702	0.000476286
217	Without_Outliers	2	cf_hh_total_soil_unspecified	MPNN_GO_M	1.19974	0.369106	0.81453	0.274617	-0.25316	-0.527616	0.17661	0.258854	-0.0235529	-0.0822484	0.34709	0.739801	0.782324
218	Without_Outliers	2	cf_eco_urban_air_close_to_ground	MPNN_GO_M	1.61263	0.41275		0.181063	0.153467	0.0550088	0.518039	0.474964	0.270329	0.485152	0.351553	0.416305	0.0883556
218	Without_Outliers	2	cf_hh_total_urban_air_close_to_ground	MPNN_GO_M	0.87073	0.39282	0.813213	0.400764	-0.581724	0.410259	0.216423	0.275555	-0.249456	0.188694	0.594465	0.737467	0.667723
219	Without_Outliers	2	cf_eco_water_unspecified	MPNN_GO_M	1.47938	0.340933		0.167792	0.154196	-0.122862	0.495784	0.352809	0.285025	0.348049	0.111198	0.424652	0.176229
219	Without_Outliers	2	cf_hh_total_water_unspecified	MPNN_GO_M	1.03398	0.417281	0.813213	0.442911	-0.375874	0.104822	0.00358742	0.385379	0.156087	0.0138064	0.444178	0.527005	0.739522
220	Without_Outliers	2	cf_eco_agricultural_soil	MPNN_GE_M	1.71646	0.350563		0.247141	0.172326	-0.231241	0.316138	0.124931	0.208873	0.220596	0.186451	0.183371	-0.0297414
220	Without_Outliers	2	cf_hh_total_agricultural_soil	MPNN_GE_M	1.09608	0.471844	0.740562	0.306927	-0.0270083	-0.0780309	0.401711	0.359593	-0.0485805	0.3048	0.463744	-0.621461	0.786054
221	Without_Outliers	2	cf_eco_air_indoor	MPNN_GE_M	1.63533	0.389157		0.194974	0.0593271	-0.00106479	0.528342	0.38432	0.23153	0.470097	0.34993	0.235535	-0.0655396
221	Without_Outliers	2	cf_hh_total_air_indoor	MPNN_GE_M	0.883215	0.395239	0.744952	0.320943	-0.271476	0.677393	0.444133	-0.159528	-0.201379	0.383931	0.648909	-1.02416	0.702363
222	Without_Outliers	2	cf_eco_air_unspecified	MPNN_GE_M	1.6534	0.384573		0.199821	-0.0228423	-0.0754957	0.522119	0.364188	0.233374	0.469496	0.300943	0.228735	-0.0260122
222	Without_Outliers	2	cf_hh_total_air_unspecified	MPNN_GE_M	0.867316	0.416592	0.735514	0.233421	-0.476715	0.769378	0.370559	0.0520836	-0.175737	0.360557	0.551605	-1.55252	0.699337
223	Without_Outliers	2	cf_eco_fresh_water	MPNN_GE_M	1.49312	0.329408		0.191756	0.0983794	0.0266981	0.486913	0.273433	0.279494	0.273899	-0.129454	0.248629	0.039153
223	Without_Outliers	2	cf_hh_total_fresh_water	MPNN_GE_M	1.00604	0.449033	0.741001	0.415344	-0.912031	0.552231	0.207198	0.386441	0.0892727	0.353718	0.328348	-1.01464	0.773232
224	Without_Outliers	2	cf_eco_lower_stratosphere_and_upper_troposphere	MPNN_GE_M	1.70224	0.389079		0.196962	0.092336	-0.0337648	0.514487	0.345593	0.19514	0.456196	0.383686	0.22465	-0.0813112
224	Without_Outliers	2	cf_hh_total_lower_stratosphere_and_upper_troposphere	MPNN_GE_M	0.934603	0.490155	0.74583	0.0879501	-0.361151	0.735674	0.337541	0.250308	0.00955265	0.385258	0.47459	-1.80565	0.668809
225	Without_Outliers	2	cf_eco_non-agricultural_soil	MPNN_GE_M	1.72276	0.347401		0.248906	0.177173	-0.169757	0.316412	0.12435	0.213137	0.219719	0.169562	0.163651	-0.0292445
225	Without_Outliers	2	cf_hh_total_non-agricultural_soil	MPNN_GE_M	1.27768	0.470148	0.748903	0.326058	-0.198251	-0.0060541	0.292799	0.368295	0.187127	0.267675	0.567982	-1.41285	0.830367
226	Without_Outliers	2	cf_eco_non-urban_air_or_from_high_stacks	MPNN_GE_M	1.70322	0.387459		0.201861	0.0120592	-0.0225038	0.511891	0.35076	0.206141	0.453652	0.360615	0.241898	-0.0259871
226	Without_Outliers	2	cf_hh_total_non-urban_air_or_from_high_stacks	MPNN_GE_M	0.938872	0.485486	0.744513	0.0836833	-0.348808	0.719572	0.328119	0.250289	-0.00900937	0.397249	0.417763	-1.83521	0.670242
227	Without_Outliers	2	cf_eco_sea_water	MPNN_GE_M	2.75036	0.493419		0.275711	0.512167	0.594169	0.303921	0.644293	0.341071	0.544155	-0.575308	-0.0761447	0.367762
227	Without_Outliers	2	cf_hh_total_sea_water	MPNN_GE_M	1.29339	0.47122	0.748683	0.494135	-0.303932	0.447203	0.518348	0.538766	0.177977	0.356184	-0.182776	-1.15437	0.509112
228	Without_Outliers	2	cf_eco_soil_unspecified	MPNN_GE_M	1.71927	0.350771		0.249781	0.167641	-0.23826	0.321445	0.120201	0.209933	0.219647	0.167771	0.182196	-0.0205463
228	Without_Outliers	2	cf_hh_total_soil_unspecified	MPNN_GE_M	1.10438	0.465413	0.749342	0.29433	-0.0685312	-0.142767	0.392412	0.360616	-0.026606	0.308027	0.460379	-0.592921	0.793822
229	Without_Outliers	2	cf_eco_urban_air_close_to_ground	MPNN_GE_M	1.64987	0.385318		0.196179	-0.0264366	-0.0383471	0.522895	0.378711	0.24322	0.483673	0.283809	0.237107	-0.0112577
229	Without_Outliers	2	cf_hh_total_urban_air_close_to_ground	MPNN_GE_M	0.861468	0.40567	0.74583	0.264904	-0.598723	0.753288	0.366711	0.0148772	-0.153773	0.382603	0.538779	-1.49061	0.702392
230	Without_Outliers	2	cf_eco_water_unspecified	MPNN_GE_M	1.49419	0.32767		0.187554	0.106784	0.0175597	0.484476	0.277497	0.27769	0.277484	-0.132055	0.267486	0.0564037
230	Without_Outliers	2	cf_hh_total_water_unspecified	MPNN_GE_M	1.00295	0.451722	0.742757	0.414612	-0.900407	0.566939	0.217583	0.382251	0.120812	0.347578	0.382111	-0.954449	0.762848
231	Without_Outliers	2	cf_eco_agricultural_soil	RF	1.337	0.481358		0.456778	0.254686	0.145555	0.344705	0.198593	0.304605	0.13594	0.215243	0.659254	0.38733
231	Without_Outliers	2	cf_hh_total_agricultural_soil	RF	1.17329	0.405565	0.693939	0.308374	0.266649	0.394613	0.333177	0.241866	0.182183	0.330231	0.475425	-0.16412	0.569099
232	Without_Outliers	2	cf_eco_agricultural_soil	XGB	1.26172	0.53812		0.508754	0.252566	0.218306	0.467685	0.243433	0.395944	0.254589	0.491923	0.809455	0.396473
232	Without_Outliers	2	cf_hh_total_agricultural_soil	XGB	1.11227	0.465789	0.704599	0.310892	0.399641	0.472479	0.428506	0.259866	0.252948	0.42087	0.527684	0.0311253	0.59405
233	Without_Outliers	2	cf_eco_agricultural_soil	GP	1.31245	0.500227		0.486387	0.181268	0.25494	0.357014	0.167444	0.37247	0.160689	0.585317	0.637078	0.330709	1.42904
233	Without_Outliers	2	cf_hh_total_agricultural_soil	GP	1.14232	0.436527	0.704599	0.356272	0.425012	0.380192	0.346483	0.263542	0.271653	0.389471	0.321018	-1.36968	0.586892	1.20714
234	Without_Outliers	2	cf_eco_agricultural_soil	DeepMPT_S	0.80571	0.325058		0.222137	0.469566	0.275551	0.312387	0.349955	0.399816	0.0820549	0.458306	0.624371	0.337139
234	Without_Outliers	2	cf_hh_total_agricultural_soil	DeepMPT_S	0.816665	0.303732	0.587566	0.128896	0.0220138	0.400661	0.0674677	0.370486	0.498128	0.376421	0.272706	0.294084	0.552913
235	Without_Outliers	2	cf_eco_agricultural_soil	MPNN_GO_S	1.52676	0.414177		0.55199	-0.0972727	0.334415	0.297207	0.234667	0.177836	0.395382	0.296406	-2.4706	-0.0252036
235	Without_Outliers	2	cf_hh_total_agricultural_soil	MPNN_GO_S	1.22824	0.336806	0.796532	0.318676	-0.291784	-0.394239	0.17624	0.0774326	-0.12865	0.114908	0.544939	0.791908	0.545921
236	Without_Outliers	2	cf_eco_agricultural_soil	MPNN_GE_S	1.50253	0.432618		0.728612	-0.0812895	0.41475	0.391179	0.155856	-0.00523261	0.295844	0.313394	-2.09762	-0.0252086
236	Without_Outliers	2	cf_hh_total_agricultural_soil	MPNN_GE_S	1.16346	0.40492	0.771071	0.372184	-0.142108	0.0272757	0.255104	0.315674	-0.0422647	0.155843	0.489988	0.0949156	0.566273
237	Without_Outliers	2	cf_eco_air_indoor	RF	1.20625	0.531863		0.400507	0.352008	0.310992	0.624585	0.490503	0.186354	0.294517	0.0744303	0.266211	0.309683
237	Without_Outliers	2	cf_hh_total_air_indoor	RF	0.945613	0.357366	0.693939	0.384287	0.234375	0.0241055	0.411722	0.193426	0.111867	0.333978	0.512917	-0.108502	0.232264
238	Without_Outliers	2	cf_eco_air_indoor	XGB	1.17724	0.554113		0.141816	0.332769	0.32244	0.695106	0.559833	0.284965	0.382329	0.384551	0.571615	0.336452
238	Without_Outliers	2	cf_hh_total_air_indoor	XGB	0.903906	0.412804	0.704599	0.383352	0.333633	0.00831534	0.424748	0.303009	0.208891	0.442247	0.604193	-0.0737483	0.221071
239	Without_Outliers	2	cf_eco_air_indoor	GP	1.21695	0.523526		0.274102	0.288889	0.344281	0.577745	0.549403	0.217757	0.270828	0.358944	0.176051	0.30501	1.38538
239	Without_Outliers	2	cf_hh_total_air_indoor	GP	0.906659	0.409222	0.704599	0.385441	0.48959	0.0942061	0.453523	0.289912	0.232652	0.398024	0.467317	-0.975559	0.248111	0.978349
240	Without_Outliers	2	cf_eco_air_indoor	DeepMPT_S	0.666131	0.50157		0.585693	0.492625	0.352201	0.452091	0.424259	0.685801	0.502689	0.550094	-0.253757	0.258065
240	Without_Outliers	2	cf_hh_total_air_indoor	DeepMPT_S	0.780539	0.353127	0.618915	-0.0493807	0.411704	0.156709	0.189931	0.422299	0.496469	0.346222	0.405699	0.596909	0.500581
241	Without_Outliers	2	cf_eco_air_indoor	MPNN_GO_S	1.63036	0.392862		0.216782	0.189451	0.0618595	0.485177	0.472067	0.135237	0.518468	0.0835148	0.256163	0.0220828
241	Without_Outliers	2	cf_hh_total_air_indoor	MPNN_GO_S	0.93456	0.32288	0.794557	0.243956	-0.947807	0.320328	0.268654	0.00134711	-0.281851	0.348553	0.57775	0.15078	0.225111
242	Without_Outliers	2	cf_eco_air_indoor	MPNN_GE_S	1.61262	0.405999		0.208537	0.200824	0.278003	0.505286	0.438474	0.20756	0.46348	0.225575	0.341451	0.0282616
242	Without_Outliers	2	cf_hh_total_air_indoor	MPNN_GE_S	0.883599	0.394712	0.764706	0.506359	-0.477185	0.679376	0.340696	-0.0266774	-0.207294	0.327672	0.6455	-0.0607965	0.486994
243	Without_Outliers	2	cf_eco_air_unspecified	RF	1.35095	0.524218		0.499675	0.227097	0.331406	0.610965	0.472047	0.23916	0.28027	0.237613	0.400385	0.254535
243	Without_Outliers	2	cf_hh_total_air_unspecified	RF	0.973578	0.367464	0.693939	0.144527	0.325409	0.234939	0.428245	0.29361	0.125072	0.274988	0.415384	-0.238148	0.219092
244	Without_Outliers	2	cf_eco_air_unspecified	XGB	1.31252	0.550901		0.532057	0.21783	0.392522	0.675984	0.503265	0.277091	0.359506	0.197858	0.624178	0.220508
244	Without_Outliers	2	cf_hh_total_air_unspecified	XGB	0.915049	0.441231	0.704599	0.263271	0.381196	0.140667	0.465637	0.412621	0.270707	0.429194	0.495443	0.0973856	0.16218
245	Without_Outliers	2	cf_eco_air_unspecified	GP	1.30213	0.557981		0.559077	0.244631	0.463786	0.589191	0.540929	0.262906	0.309152	0.370376	0.176858	0.377655	1.37065
245	Without_Outliers	2	cf_hh_total_air_unspecified	GP	0.922384	0.432236	0.704599	0.273233	0.568447	0.243165	0.448679	0.408252	0.263029	0.348772	0.407122	-1.09159	0.283693	0.97657
246	Without_Outliers	2	cf_eco_air_unspecified	DeepMPT_S	0.716062	0.498579		0.160517	0.506699	0.434231	0.407236	0.508342	0.535183	0.513743	0.615324	0.446327	0.66907
246	Without_Outliers	2	cf_hh_total_air_unspecified	DeepMPT_S	0.735473	0.422515	0.639153	0.27674	0.553452	0.552299	0.370314	0.514602	0.35062	0.261346	0.414906	0.330225	0.537654
247	Without_Outliers	2	cf_eco_air_unspecified	MPNN_GO_S	1.23251	0.487224		0.432251	0.199731	0.40531	0.480878	0.589126	0.253138	0.0467407	-0.0871501		0.300687
247	Without_Outliers	2	cf_hh_total_air_unspecified	MPNN_GO_S	0.889153	0.386845	0.797849	0.320068	-0.48837	0.738907	0.201563	0.217455	-0.162574	0.308092	0.582558	-0.104069	0.291189
248	Without_Outliers	2	cf_eco_air_unspecified	MPNN_GE_S	1.29745	0.431758		0.172347	0.194121	0.467743	0.330429	0.490921	0.257711	0.0919218	0.00472489		0.234148
248	Without_Outliers	2	cf_hh_total_air_unspecified	MPNN_GE_S	0.861999	0.423724	0.771291	0.337081	-0.411639	0.662021	0.32715	0.161205	-0.281451	0.403319	0.695407	0.230939	0.535723
249	Without_Outliers	2	cf_eco_fresh_water	RF	1.2708	0.49321		0.469901	0.422543	0.185247	0.45853	0.342007	0.305125	0.285795	0.348908	0.599477	0.287227
249	Without_Outliers	2	cf_hh_total_fresh_water	RF	1.0357	0.46879	0.693939	0.471136	0.267322	0.359969	0.318846	0.448796	0.2975	0.31901	0.41832	-0.0821448	0.483306
250	Without_Outliers	2	cf_eco_fresh_water	XGB	1.21482	0.536876		0.47046	0.485007	0.297102	0.579172	0.402343	0.394546	0.382831	0.501858	0.360276	0.308065
250	Without_Outliers	2	cf_hh_total_fresh_water	XGB	0.969516	0.534509	0.704599	0.570524	0.400368	0.467436	0.39569	0.527045	0.361735	0.414937	0.590663	-0.183636	0.452229
251	Without_Outliers	2	cf_eco_fresh_water	GP	1.22509	0.529014		0.46669	0.53642	0.374148	0.495131	0.418074	0.401029	0.292421	0.429748	0.572287	0.375083	1.21136
251	Without_Outliers	2	cf_hh_total_fresh_water	GP	0.971216	0.532875	0.704599	0.411982	0.515542	0.469281	0.383662	0.544641	0.461177	0.36452	0.327892	-1.84057	0.502091	1.06189
252	Without_Outliers	2	cf_eco_fresh_water	DeepMPT_S	0.799119	0.375244		0.0246528	0.0450485	0.486061	0.367052	0.431696	0.411364	0.526629	0.140402	0.204407	0.3835
252	Without_Outliers	2	cf_hh_total_fresh_water	DeepMPT_S	0.783288	0.358284	0.652646	0.177969	0.52179	0.262263	0.51674	0.548732	0.479173	-0.161507	0.463064	0.278925	0.63181
253	Without_Outliers	2	cf_eco_fresh_water	MPNN_GO_S	0.987363	0.497304		0.51949	-0.142616	0.558734	0.587995	0.484717	0.29157	0.257379	0.195421		0.534566
253	Without_Outliers	2	cf_hh_total_fresh_water	MPNN_GO_S	1.08447	0.359769	0.798727	0.295259	-0.72983	0.647676	-0.0776631	0.319768	0.144754	0.113302	0.475543	-0.15392	0.503485
254	Without_Outliers	2	cf_eco_fresh_water	MPNN_GE_S	1.05308	0.428161		0.296014	-0.460474	0.637603	0.549637	0.349619	0.432331	0.13	-0.348067		0.30568
254	Without_Outliers	2	cf_hh_total_fresh_water	MPNN_GE_S	1.02506	0.427998	0.77151	0.434765	-1.00645	0.619965	0.273643	0.209721	0.046437	0.148417	0.597882	-0.437467	0.750257
255	Without_Outliers	2	cf_eco_lower_stratosphere_and_upper_troposphere	RF	1.35854	0.536762		0.51648	0.175637	0.304855	0.637881	0.370288	0.129705	0.266752	0.298802	-0.30334	0.467355
255	Without_Outliers	2	cf_hh_total_lower_stratosphere_and_upper_troposphere	RF	1.09492	0.417969	0.693939	0.152409	0.391321	0.347053	0.427959	0.399181	0.19995	0.281059	0.309473	-0.55948	0.188276
256	Without_Outliers	2	cf_eco_lower_stratosphere_and_upper_troposphere	XGB	1.3256	0.558956		0.470826	0.22678	0.345583	0.717102	0.417255	0.19434	0.319686	0.377234	-0.179132	0.466138
256	Without_Outliers	2	cf_hh_total_lower_stratosphere_and_upper_troposphere	XGB	1.0142	0.500623	0.704599	0.204102	0.503812	0.355432	0.500593	0.52212	0.315098	0.420949	0.414855	0.040339	0.158571
257	Without_Outliers	2	cf_eco_lower_stratosphere_and_upper_troposphere	GP	1.39878	0.50892		0.293694	0.174705	0.420016	0.667928	0.344576	0.207096	0.263612	0.330591	-0.0328935	0.468595	1.41656
257	Without_Outliers	2	cf_hh_total_lower_stratosphere_and_upper_troposphere	GP	1.03693	0.477986	0.704599	0.173867	0.600611	0.366706	0.464598	0.527251	0.295485	0.316527	0.361899	-1.2133	0.26308	1.04168
258	Without_Outliers	2	cf_eco_lower_stratosphere_and_upper_troposphere	DeepMPT_S	0.714344	0.474213		0.350214	0.322495	0.48021	0.599628	0.458913	0.411447	0.383827	0.688392	-0.651465	0.56077
258	Without_Outliers	2	cf_hh_total_lower_stratosphere_and_upper_troposphere	DeepMPT_S	0.753365	0.428299	0.61164	0.199834	0.588662	0.533978	0.428833	0.45411	0.158177	0.308287	0.47594	0.330938	0.605789
259	Without_Outliers	2	cf_eco_lower_stratosphere_and_upper_troposphere	MPNN_GO_S	1.61224	0.435031		0.216683	0.454417	0.546876	0.620796	0.218763	0.201215	0.357506	0.118557	0.682807	0.148252
259	Without_Outliers	2	cf_hh_total_lower_stratosphere_and_upper_troposphere	MPNN_GO_S	0.968728	0.452244	0.798068	0.262941	-0.333688	0.661993	0.269743	0.301966	-0.0200775	0.204309	0.715154	0.275258	0.100885
260	Without_Outliers	2	cf_eco_lower_stratosphere_and_upper_troposphere	MPNN_GE_S	1.5461	0.480435		0.40154	0.372406	0.553095	0.614066	0.295956	0.199707	0.35238	0.131191	0.35955	0.177508
260	Without_Outliers	2	cf_hh_total_lower_stratosphere_and_upper_troposphere	MPNN_GE_S	0.937657	0.486818	0.77173	0.218413	-0.0524157	0.512533	0.354735	0.282984	-0.0698318	0.402231	0.159477	0.0420098	0.545809
261	Without_Outliers	2	cf_eco_non-agricultural_soil	RF	1.37542	0.489792		0.477266	0.325257	0.138051	0.308472	0.142763	0.276944	0.129895	0.311318	0.124706	0.383249
261	Without_Outliers	2	cf_hh_total_non-agricultural_soil	RF	1.27665	0.444459	0.693939	0.474615	0.329666	0.400259	0.338966	0.23435	0.224014	0.283162	0.403217	-0.265375	0.545448
262	Without_Outliers	2	cf_eco_non-agricultural_soil	XGB	1.33368	0.520284		0.460488	0.535736	0.196221	0.353442	0.178346	0.351109	0.17411	0.415969	0.447087	0.4333
262	Without_Outliers	2	cf_hh_total_non-agricultural_soil	XGB	1.2061	0.504168	0.704599	0.484455	0.49788	0.470822	0.404355	0.268488	0.292032	0.403453	0.47135	-0.0271019	0.595811
263	Without_Outliers	2	cf_eco_non-agricultural_soil	GP	1.33592	0.518674		0.487453	0.518199	0.201873	0.30849	0.186597	0.297673	0.0658989	0.401645	0.0474123	0.521673	1.42177
263	Without_Outliers	2	cf_hh_total_non-agricultural_soil	GP	1.24916	0.468133	0.704599	0.486239	0.492715	0.376803	0.32303	0.292451	0.282962	0.354354	0.26525	-1.20853	0.570753	1.35768
264	Without_Outliers	2	cf_eco_non-agricultural_soil	DeepMPT_S	0.707114	0.471838		0.702863	0.442409	0.476226	0.532913	0.363341	0.560408	0.369217	0.419394	-0.989679	0.296968
264	Without_Outliers	2	cf_hh_total_non-agricultural_soil	DeepMPT_S	0.782221	0.350174	0.62619	-0.158639	0.35335	0.333671	0.277741	0.315837	0.589322	0.463887	0.265873	-2.849	0.572726
265	Without_Outliers	2	cf_eco_non-agricultural_soil	MPNN_GO_S	1.47678	0.431697		0.463719	0.192755	0.0614681	0.107097	0.366215	-0.0120289	0.194306	0.379434		0.234869
265	Without_Outliers	2	cf_hh_total_non-agricultural_soil	MPNN_GO_S	1.47083	0.297844	0.800044	0.0724973	-0.224373	-0.5144	0.256244	0.146281	0.0270969	0.154574	0.452678	0.853173	0.21676
266	Without_Outliers	2	cf_eco_non-agricultural_soil	MPNN_GE_S	1.32728	0.540934		0.720415	0.307281	0.237412	0.216442	0.298559	0.236289	0.114839	0.371171		0.249796
266	Without_Outliers	2	cf_hh_total_non-agricultural_soil	MPNN_GE_S	1.31489	0.43884	0.764486	0.33998	-0.0832964	-0.182344	0.246645	0.287042	0.173943	0.208155	-0.148855	0.528822	0.769634
267	Without_Outliers	2	cf_eco_non-urban_air_or_from_high_stacks	RF	1.50611	0.485107		0.439275	0.309573	0.368538	0.457132	0.473887	0.175123	0.298956	0.10997	0.113212	0.288726
267	Without_Outliers	2	cf_hh_total_non-urban_air_or_from_high_stacks	RF	1.09729	0.415443	0.693939	0.118306	0.372617	0.379364	0.420753	0.389346	0.202806	0.284088	0.328608	-0.528749	0.186858
268	Without_Outliers	2	cf_eco_non-urban_air_or_from_high_stacks	XGB	1.4565	0.518468		0.443966	0.221573	0.482434	0.560178	0.510985	0.235332	0.408907	0.0778596	0.38647	0.367687
268	Without_Outliers	2	cf_hh_total_non-urban_air_or_from_high_stacks	XGB	1.0142	0.500626	0.704599	0.180658	0.4963	0.354141	0.506544	0.530073	0.334507	0.414984	0.419452	-0.0510748	0.136574
269	Without_Outliers	2	cf_eco_non-urban_air_or_from_high_stacks	GP	1.4912	0.495251		0.361603	0.28909	0.4869	0.521846	0.512284	0.256011	0.390326	0.252256	0.00967778	0.318676	1.3959
269	Without_Outliers	2	cf_hh_total_non-urban_air_or_from_high_stacks	GP	1.03733	0.477592	0.704599	0.1513	0.601751	0.366696	0.465067	0.527269	0.295734	0.317024	0.361569	-1.21203	0.263539	1.04238
270	Without_Outliers	2	cf_eco_non-urban_air_or_from_high_stacks	DeepMPT_S	0.748152	0.408166		0.564887	0.00662357	0.403097	0.440844	-0.140951	0.61674	0.623862	0.296471	-0.258745	0.262937
270	Without_Outliers	2	cf_hh_total_non-urban_air_or_from_high_stacks	DeepMPT_S	0.738885	0.449579	0.640741	0.263754	0.385082	0.53598	0.469049	0.506149	0.203909	0.332569	0.493211	0.624248	0.629498
271	Without_Outliers	2	cf_eco_non-urban_air_or_from_high_stacks	MPNN_GO_S	1.41239	0.480195		0.428174	0.278941	0.207938	0.551139	0.281202	0.296481	0.395737	-0.0952773	-1.89011	0.351894
271	Without_Outliers	2	cf_hh_total_non-urban_air_or_from_high_stacks	MPNN_GO_S	0.978843	0.440745	0.799824	0.274722	0.223437	0.575015	0.274149	0.300462	-0.431885	0.398605	0.653722	0.193976	0.0515183
272	Without_Outliers	2	cf_eco_non-urban_air_or_from_high_stacks	MPNN_GE_S	1.43634	0.462413		0.295475	0.22774	0.0499062	0.636523	0.378086	0.271331	0.256506	-0.371924	-1.53402	0.406184
272	Without_Outliers	2	cf_hh_total_non-urban_air_or_from_high_stacks	MPNN_GE_S	0.952978	0.46991	0.77173	0.247794	-0.0450246	0.246668	0.307941	0.332585	-0.140911	0.302468	0.555421	-0.0760172	0.465437
273	Without_Outliers	2	cf_eco_sea_water	RF	2.45705	0.620746		0.411453	0.575536	0.573688	0.477827	0.508291	0.532172	0.542412	0.297836	0.530744	0.641984
273	Without_Outliers	2	cf_hh_total_sea_water	RF	1.42649	0.509821	0.693939	0.242673	0.220108	0.447186	0.541751	0.529721	0.418217	0.391743	0.651748	-0.135175	0.45082
274	Without_Outliers	2	cf_eco_sea_water	XGB	2.37358	0.646075		0.393035	0.682279	0.567993	0.538549	0.557053	0.589448	0.582298	0.462158	0.816019	0.618343
274	Without_Outliers	2	cf_hh_total_sea_water	XGB	1.36201	0.553138	0.704599	0.208593	0.511213	0.634836	0.592747	0.526245	0.483171	0.465611	0.755141	-1.09896	0.54322
275	Without_Outliers	2	cf_eco_sea_water	GP	2.42322	0.631116		0.493694	0.689906	0.554403	0.493004	0.545397	0.545399	0.519204	0.234655	0.590972	0.594361	2.42397
275	Without_Outliers	2	cf_hh_total_sea_water	GP	1.31508	0.5834	0.704599	0.358461	0.519582	0.544417	0.531394	0.611958	0.554025	0.38217	0.637463	-0.123251	0.584749	1.37029
276	Without_Outliers	2	cf_eco_sea_water	DeepMPT_S	0.72667	0.480943		0.680293	0.578582	0.504295	-0.381282	0.57124	0.621038	0.564468	0.700409	-0.821642	0.556659
276	Without_Outliers	2	cf_hh_total_sea_water	DeepMPT_S	0.6852	0.493063	0.625529	0.797939	0.486145	0.446601	0.677162	0.636827	0.661923	-0.145827	0.49876	0.708658	0.188133
277	Without_Outliers	2	cf_eco_sea_water	MPNN_GO_S	2.37757	0.617103		0.152473	0.696537	0.699783	0.446985	0.536609	0.543948	0.525618	0.280788		0.412271
277	Without_Outliers	2	cf_hh_total_sea_water	MPNN_GO_S	1.3019	0.46424	0.802019	0.248411	-0.164616	0.714787	0.390841	0.537279	0.442149	0.257755	0.672586	-0.58884	0.417132
278	Without_Outliers	2	cf_eco_sea_water	MPNN_GE_S	2.43376	0.598791		0.219803	0.604533	0.718277	0.425417	0.512193	0.587864	0.498146	0.635223		0.098068
278	Without_Outliers	2	cf_hh_total_sea_water	MPNN_GE_S	1.18746	0.554291	0.771071	0.510856	-0.295073	0.73348	0.609492	0.524604	0.418201	0.298193	0.569743	-0.716578	0.678702
279	Without_Outliers	2	cf_eco_soil_unspecified	RF	1.36301	0.498707		0.50193	0.368594	0.112441	0.318743	0.134636	0.27129	0.117046	0.293564	0.250705	0.381471
279	Without_Outliers	2	cf_hh_total_soil_unspecified	RF	1.17108	0.404635	0.693939	0.307535	0.27572	0.385989	0.360517	0.23769	0.18197	0.316359	0.454347	-0.294756	0.565788
280	Without_Outliers	2	cf_eco_soil_unspecified	XGB	1.33312	0.520448		0.45485	0.519102	0.197018	0.354863	0.190488	0.356901	0.191742	0.433908	0.490155	0.408439
280	Without_Outliers	2	cf_hh_total_soil_unspecified	XGB	1.11673	0.458611	0.704599	0.284659	0.411239	0.466431	0.425491	0.256883	0.241106	0.417087	0.482447	0.082548	0.592914
281	Without_Outliers	2	cf_eco_soil_unspecified	GP	1.33822	0.516778		0.482902	0.521195	0.20187	0.305714	0.181903	0.301739	0.0721459	0.406068	0.0509865	0.491084	1.41956
281	Without_Outliers	2	cf_hh_total_soil_unspecified	GP	1.14394	0.431909	0.704599	0.353468	0.430121	0.383325	0.343953	0.271548	0.265104	0.386956	0.317793	-1.33781	0.572659	1.21429
282	Without_Outliers	2	cf_eco_soil_unspecified	DeepMPT_S	0.720368	0.450482		0.646992	0.309142	0.499523	0.532256	0.336427	0.547785	0.335559	0.461332	-1.16006	0.208805
282	Without_Outliers	2	cf_hh_total_soil_unspecified	DeepMPT_S	0.793407	0.337894	0.628836	-0.101692	0.211178	0.223657	0.257476	0.416415	0.596903	0.340683	0.0808869	0.380525	0.605065
283	Without_Outliers	2	cf_eco_soil_unspecified	MPNN_GO_S	1.4037	0.48685		0.557782	0.255699	0.212298	0.200672	0.32242	0.0516888	0.245321	0.117444		0.316529
283	Without_Outliers	2	cf_hh_total_soil_unspecified	MPNN_GO_S	1.28393	0.277461	0.799385	0.194401	-0.326699	-0.0720234	0.286938	0.156032	-0.160312	0.110029	0.500653	0.623374	0.106751
284	Without_Outliers	2	cf_eco_soil_unspecified	MPNN_GE_S	1.30878	0.553905		0.804707	0.313361	0.332563	0.132215	0.319294	0.156042	0.0787286	-0.00963821		0.303922
284	Without_Outliers	2	cf_hh_total_soil_unspecified	MPNN_GE_S	1.19072	0.378558	0.771071	0.257444	-0.602617	0.0127587	0.392484	0.300709	-0.249301	0.220836	0.371704	0.0561812	0.637661
285	Without_Outliers	2	cf_eco_urban_air_close_to_ground	RF	1.39748	0.500783		0.460046	0.345594	0.339321	0.50138	0.442846	0.203597	0.318952	0.173182	0.120761	0.29872
285	Without_Outliers	2	cf_hh_total_urban_air_close_to_ground	RF	0.950643	0.36927	0.693939	0.280934	0.303638	0.18737	0.418358	0.266701	0.144667	0.305218	0.471684	-0.262881	0.203881
286	Without_Outliers	2	cf_eco_urban_air_close_to_ground	XGB	1.34926	0.534637		0.449757	0.2524	0.457318	0.619788	0.504092	0.278916	0.424576	0.206397	0.384634	0.344889
286	Without_Outliers	2	cf_hh_total_urban_air_close_to_ground	XGB	0.903819	0.429873	0.704599	0.321208	0.357409	0.142523	0.464884	0.355617	0.236297	0.44146	0.529297	-0.0463799	0.162688
287	Without_Outliers	2	cf_eco_urban_air_close_to_ground	GP	1.38321	0.510925		0.372151	0.305587	0.501514	0.557105	0.487309	0.321604	0.391692	0.338191	0.0084061	0.311857	1.34075
287	Without_Outliers	2	cf_hh_total_urban_air_close_to_ground	GP	0.909264	0.422983	0.704599	0.296366	0.555828	0.214496	0.446196	0.379661	0.246225	0.358607	0.411687	-1.03442	0.28047	0.97285
288	Without_Outliers	2	cf_eco_urban_air_close_to_ground	DeepMPT_S	0.722274	0.442722		0.556181	0.125838	0.515389	0.467544	0.0789325	0.584922	0.576011	0.583721	-0.520998	0.166287
288	Without_Outliers	2	cf_hh_total_urban_air_close_to_ground	DeepMPT_S	0.733365	0.420178	0.63254	0.326551	0.610346	0.672226	0.333665	0.470743	0.330797	0.183973	0.476377	0.613854	0.567037
289	Without_Outliers	2	cf_eco_urban_air_close_to_ground	MPNN_GO_S	1.38299	0.442074		0.371944	0.314743	0.244616	0.442671	0.30147	0.126286	0.230034	0.268515	-1.04635	0.325328
289	Without_Outliers	2	cf_hh_total_urban_air_close_to_ground	MPNN_GO_S	0.890256	0.365283	0.792581	0.361194	-0.329733	0.222739	0.295716	0.211866	-0.357796	0.309583	0.540474	0.788604	0.288089
290	Without_Outliers	2	cf_eco_urban_air_close_to_ground	MPNN_GE_S	1.34503	0.47228		0.323081	0.217811	0.127347	0.607272	0.438193	0.218701	0.307576	0.0157325	-1.61817	0.327593
290	Without_Outliers	2	cf_hh_total_urban_air_close_to_ground	MPNN_GE_S	0.895126	0.358321	0.77151	0.399125	-1.49858	0.597919	0.215337	0.0794278	-0.212753	0.339901	0.481759	-0.871287	0.636478
291	Without_Outliers	2	cf_eco_water_unspecified	RF	1.15645	0.448731		0.476564	0.26629	0.276858	0.482143	0.337301	0.30208	0.254345	0.417134	0.862285	0.368035
291	Without_Outliers	2	cf_hh_total_water_unspecified	RF	1.03836	0.467208	0.693939	0.46122	0.249263	0.34449	0.336415	0.458276	0.303257	0.306015	0.45519	-0.0503373	0.461197
292	Without_Outliers	2	cf_eco_water_unspecified	XGB	1.09544	0.505366		0.468248	0.328921	0.41087	0.5795	0.421391	0.392294	0.291595	0.542702	0.896351	0.429821
292	Without_Outliers	2	cf_hh_total_water_unspecified	XGB	0.956775	0.547645	0.704599	0.573583	0.419678	0.47371	0.429375	0.517856	0.416994	0.39722	0.61317	-0.268721	0.476949
293	Without_Outliers	2	cf_eco_water_unspecified	GP	1.14195	0.462465		0.389846	0.269802	0.320214	0.468501	0.441196	0.418372	0.256627	0.439297	0.859402	0.357267	1.22339
293	Without_Outliers	2	cf_hh_total_water_unspecified	GP	0.971289	0.533816	0.704599	0.410981	0.521045	0.468582	0.386578	0.549238	0.458851	0.361843	0.334084	-1.84146	0.499193	1.06326
294	Without_Outliers	2	cf_eco_water_unspecified	DeepMPT_S	0.759667	0.384692		-0.219784	0.666864	0.167431	0.464594	0.383928	0.315323	0.5252	0.117044	0.46562	0.175418
294	Without_Outliers	2	cf_hh_total_water_unspecified	DeepMPT_S	0.741128	0.426537	0.678175	0.38161	0.430412	0.170145	0.491634	0.555953	0.500373	0.192956	0.473707	0.291411	0.654592
295	Without_Outliers	2	cf_eco_water_unspecified	MPNN_GO_S	1.18079	0.513863		0.384691	0.361794	0.520621	0.674547	0.482729	0.329175	0.379314	0.35084	0.240225	0.207378
295	Without_Outliers	2	cf_hh_total_water_unspecified	MPNN_GO_S	1.07091	0.374912	0.8018	0.352762	-0.738615	0.40572	-0.0130054	0.352881	0.22667	0.0211819	0.303981	0.462981	0.553518
296	Without_Outliers	2	cf_eco_water_unspecified	MPNN_GE_S	1.09983	0.578242		0.63266	0.509402	0.4128	0.720671	0.445045	0.346648	0.35841	0.446352	-0.505185	0.121895
296	Without_Outliers	2	cf_hh_total_water_unspecified	MPNN_GE_S	1.01951	0.433468	0.770632	0.439081	-0.807205	0.58764	0.194017	0.330334	-0.0541208	0.221399	0.633754	0.221912	0.735036
